# Supplementary material for: 2014 Annual Report of the American Board of Psychiatry and Neurology, Inc.
Source: Atypon-hosted journal article supplement (doi:10.1176/appi.ajp.2015.1720901), 2015-09-01
Supplement: appi.ajp.2015.1720901.ds001.pdf [file appi.ajp.2015.1720901.ds001.pdf]

**Announcing diplomates of the ABPN for: Maintenance of Certification in Psychiatry awarded  
February 3, 2014**

Archil Abashidze, M.D., Glen Burnie, MD  
Mohamed A. Abdel Aziz, M.D., M.S., Mason, OH  
Elias Nassif Aboujaoude, M.D., Stanford, CA  
Paul Timothy Abrinko, M.D., Oakland, CA  
S. Carolyn Acker, M.D., Atlanta, GA  
Kathleen Cantwell Ackerman, M.D., Bethesda, MD  
Douglas William Adams, M.D., Madison, AL  
Akinola Oluwafemi Adebisi, M.D., Brooklyn, NY  
Nayyar Afroz, M.D., Chicago, IL  
Sheikh M. M. Afzal, M.D., Allentown, PA  
Eileen Patricia Ahearn, M.D., Madison, WI  
Susan Elizabeth Ahmari, M.D., Downers Grove, IL  
Mahmoud Mostafa Ahmed, M.D., Eau Claire, WI  
Suman Ahuja, M.D., Pittsburgh, PA  
Aafaque Akhter, M.D., Norton, MA  
Akintayo Oluwatosin Akinlawon, M.D., Richardson, TX  
Husam K. Alathari, M.D., McLean, VA  
Larry Adam Alb, M.D., Villa Park, CA  
Mark Joseph Albanese, M.D., Winchester, MA  
Ghada A. Albeheary, M.D., Chicago, IL  
Vicki Ann Alberts, M.D., Chattahoochee, FL  
Suzanne Alice Albrecht, M.D., Suttons Bay, MI  
Ronald Craig Albucher, M.D., San Francisco, CA  
Marya Jocelyn Alexander, M.D., Laguna Hills, CA  
Mehrunissa Ali, M.D., Lees Summit, MO  
Syed Asif H Ali, M.D., Silver Spring, MD  
John Hudson Allahham, M.D., Danville, KY  
Carlin Ann Alleyne, M.D., Owings Mills, MD  
Hassan Salhani Almaat, M.D., Bloomfield Hills, MI  
Arlene Christie Hernandez Almazan, M.D., Skowhegan, ME  
Patrick John Amar, M.D., Atlanta, GA  
Richard Patrick Amar, M.D., Atlanta, GA  
Laura Christine Anderson, M.D., Denver, CO  
Mioara Andrei, M.D., Montvale, NJ  
Angela Dawn Angstmann, M.D., San Francisco, CA  
Maria Maria Anleu, M.D., South Beloit, IL  
Jennifer Emily Annunziata, M.D., San Francisco, CA  
Ifeoma Juliet Anwunah-Okoye, M.D., North Brunswick, NJ  
Joan Meyer Anzia, M.D., River Forest, IL  
Darryl Evan Appleton, M.D., Delray Beach, FL  
Flavio A. Arana, M.D., Chicago, IL  
Arturo-Plinio Archila, M.D., Tenafly, NJ  
Emma Bernabe Arellano-Cabusao, M.D., Wheaton, IL  
Michael Nicholas Arena, D.O., Maspeth, NY  
Rasim Arikan, M.D., South Dartmouth, MA  
Mark Daniel Armerding, M.D., Reno, NV  
Yevgenia Aronova, M.D., New York, NY

Monica Arora, M.D., Omaha, NE  
Lillian M. Arroyo-Rivera, M.D., Guaynabo, PR  
Jose M. Artadi, M.D., Alpharetta, GA  
Jose Francisco Artecona, M.D., Baton Rouge, LA  
Roselin Arunachalam, M.D., Champaign, IL  
Michelle Goldman Ashley, M.D., Pacific Palisades, CA  
Raymond Robert Auger, M.D., Rochester, MN  
Jasdeep Singh Aulakh, M.D., Patton, CA  
Ayodele Olusegun Ayoade, M.D., Irving, TX  
Maher Omar Ayyash, M.D., Wexford, PA  
Olasimbo M. Babatope, M.D., Martinez, GA  
Estera Andronik Badalyan, M.D., Alameda, CA  
Ruxandra Carmen Badescu, M.D., Huntington, NY  
Alison Barnes Baker, M.D., Fayetteville, GA  
Paul Gerard Baldizzi, M.D., Naples, FL  
Carolyn Oates Ballantine, M.D., Raleigh, NC  
Tiffany Eilers Ballard, D.O., Austin, TX  
Daniel John Balog, M.D., Charleston, SC  
Robert Donald Barger, M.D., Traverse City, MI  
Mary Louisa Barnhart, M.D., M.P.H., China Village, ME  
Ivan Stephen Baroya, M.D., Chula Vista, CA  
Gaston Carlos Baslet, M.D., Jamaica Plain, MA  
Jaskanwar Singh Batra, M.D., South Burlington, VT  
Michelle Bauer, M.D., Salt Lake City, UT  
Raymond Max Baum, M.D., Millstone Township, NJ  
Brigid Bonsato Bautista, M.D., Philadelphia, PA  
Ethan Alan Bean, M.D., Raleigh, NC  
Marc David Bear, M.D., Chicago, IL  
Joseph Marshall Bebhuk, M.D., Plymouth, MN  
John Jefferson Beddingfield III, M.D., Jackson, MS  
David Benjamin Bekelman, M.D., Denver, CO  
Kara Delynn Belue, M.D., Little Rock, AR  
Louis Roger Belzie, M.D., Rockville Centre, NY  
Daniel Rhodes Bennett, M.D., Agoura, CA  
Jeffrey Ivan Bennett, M.D., Springfield, IL  
William Leroy Bennett, M.D., Mead, WA  
Joshua Aaron Berman, M.D., Ph.D., New York, NY  
Valentin Berman, M.D., Chicago, IL  
Ricardo Bernal, M.D., Orlando, FL  
Matthew Evan Bernstein, M.D., Framingham, MA  
David Wayne Berrier, M.D., Chicago, IL  
Myriam Aurelia Bertoldo Townsend, M.D., San Jose, CA  
Nitin Prabhakar Bhosale, M.D., Scottsdale, AZ  
Arkady Bilenko, M.D., Brooklyn, NY  
Carol Sue Birnbaum, M.D., Cambridge, MA  
Reemon N. Bishara, M.D., Savannah, GA  
Trina Lee Bivens, M.D., Coppell, TX  
Adam Simon Blackman, M.D., Toronto, ON  
Greg David Blaisdell, M.D., Waco, TX  
Jennifer Bleak, M.D., Janesville, WI  
William V. Bobo, M.D., Rochester, MN

Zofia Bochacki, M.D., Morganton, NC  
Tiberiu Florin Bodea Crisan, M.D., Pittsburgh, PA  
Paul Stelian Bodea-Barothi, M.D., Burleson, TX  
Daniela A. Boerescu, M.D., Providence, RI  
Ann Marjorie Bogan, M.D., Palo Alto, CA  
Philip Manning Bolton, M.D., Portland, OR  
Mihaela Boran, M.D., Fairfield, CT  
Karin Elizabeth Borgmann-Winter, M.D., Conshohocken, PA  
Esad Boskailo, M.D., Phoenix, AZ  
Kathleen Mary Bottum, M.D., Ph.D., Mechanicsburg, IL  
Iveta Boyanchek, M.D., Columbus, GA  
Judith Lea Boyer-Patrick, M.D., M.P.H., Ellicott City, MD  
Daniel William Bradford, M.D., Chapel Hill, NC  
William Harold Bragdon Jr., M.D., Lexington, SC  
Thomas Brashers-Krug, M.D., Ph.D., Iowa City, IA  
Eric Joseph Brewer, M.D., Pittsford, NY  
Jessica Janelle Bright, M.D., Ann Arbor, MI  
Kristin Erin Brink, M.D., Oregon, WI  
Joanne Tortomas Brodtkin White, M.D., Hopewell Junction, NY  
Elizabeth Ann Bromley, M.D., Ph.D., Sherman Oaks, CA  
Mehri Inman Brown, M.D., San Francisco, CA  
Michelle Lanette Browne-Barnum, M.D., Denham Springs, LA  
Kirstin Ellen Brunner, D.O., Erie, PA  
Alina Budu, M.D., Houston, TX  
Christopher Brent Bullock, M.D., Newton Highlands, MA  
George Joseph Burnett, M.D., Buffalo, NY  
Jeffrey Michael Burock, M.D., Warren, RI  
James Daniel Byrne, M.D., Richmond, VA  
Joanna Edyta Caban, M.D., Highland Park, IL  
Victoria Mabutas Cabanela, M.D., Vallejo, CA  
Roger John Cabansag, M.D., Loma Linda, CA  
Wenhui Cai, M.D., Ph.D., TUCSON, AZ  
Andrea Lenore Caldwell, M.D., San Pedro, CA  
Brenda Y. Camacho, M.D., Mantua, NJ  
Michele Ann Campione, M.D., New York, NY  
Oscar Alberto Canale, M.D., San Luis Obispo, CA  
Sheila Sheftall Cannon, M.D., Atlanta, GA  
Lisa Ann Marie Carbone, M.D., Brookline, MA  
Lynnea Terese Carder, M.D., Spencerville, IN  
Thomas Mitchell Cardwell, M.D., Woodstock, VA  
Sarah M. Carey, , Menlo Park, CA  
Alicia Tiamson Carlos, D.O., Lexington, KY  
Deborah Lee Carlson, M.D., Salem, OR  
Marjorie Caro, M.D., Miami, FL  
Timothy Lewis Carpenter, D.O., Florence, AL  
Christopher Patrick Carroll, M.D., Cockeysville, MD  
William Paul Carter, M.D., Belmont, MA  
Sara Aikins Cartmell, M.D., Bethesda, MD  
Aldo Joseph Castiglioni Jr., M.D., College Station, TX  
Anthony James Caterine, M.D., Poquoson, VA  
Deborah Susan Cavanaugh, M.D., Saint Paul, MN

Barbara Herman Center, M.D., Madison, WI  
Tracy Marie Chaffee, M.D., Norwalk, CA  
John Robert Chamberlain, M.D., Foster City, CA  
Vivien Chan, M.D., Irvine, CA  
Satyanarayana Chandragiri, M.D., Salem, OR  
Michael Chang, M.D., Honolulu, HI  
Ian Jonathan Chapel, M.D., Virginia Beach, VA  
France Irene Chaput, M.D., New York, NY  
Michail Charissis, M.D., Washington, DC  
Sujatha Charlu, M.D., New York, NY  
Karen Jeanne Chason, D.O., Altha, FL  
Anand Mohan Chaturvedi, M.D., Akron, OH  
Tanveer Ahmad Chaudhry, M.D., Brooksville, FL  
Mitali Chaudhuri-Basu, M.D., San Antonio, TX  
Farid Chekaoui, M.D., Santa Rosa Beach, FL  
John Yu-Sheng Chen, M.D., San Jose, CA  
Yung-Cheng Joseph Chen, M.D., M.P.H., Westminster, CA  
Merrie Anna Cherry, M.D., Lexington, SC  
Chelsea Lynn Chesen, M.D., Omaha, NE  
David Houliet Cheung, M.D., Tustin, CA  
Srinivas Chilakamarri, M.D., St. Louis, MO  
Laura Zue Childress-Hazen, M.D., Pittsburgh, PA  
Fee Sean Jane Chin, M.D., San Diego, CA  
Martin Stuart Chin, M.D., Washington, DC  
Samuel Chin, M.D., Irvine, CA  
Radhika G. Chithriki, M.D., Jacksonville, FL  
Raymond Young-Jin Cho, M.D., Pittsburgh, PA  
Samson Junyong Cho, M.D., Torrance, CA  
Joseph Patric Chozinski, M.D., Colorado Springs, CO  
Scott Douglas Christie, M.D., Mt Pleasant, SC  
Diana Ochoa Chu, M.D., Bloomington, IL  
Linda I-An Chuang, M.D., Ridgewood, NJ  
Bok Chung, M.D., Omaha, NE  
John Cleo Ciaccio, M.D., Coal Valley, IL  
Roza Bozena Cieszkowski, M.D., Brownsboro, AL  
Nicole Harrington Cirino, M.D., Portland, OR  
Heather W. Clague, M.D., Berkeley, CA  
Greg Lawson Clary, M.D., Morganton, NC  
Jennifer K. Coffman, M.D., Portland, OR  
Neil Randolph Cohn, M.D., Philadelphia, PA  
Richard A. Cohn, M.D., Englewood, CO  
Sean Coldren, M.D., Coatesville, PA  
Dianne Louise Collins, D.O., Roseville, CA  
Jenny Meyer Colman, M.D., Lagrangeville, NY  
Vincent Frederick Colon, M.D., Warren, NJ  
Daniel Woodall Comiskey, M.D., Tiverton, RI  
John Anderson Coons, M.D., Lake St Louis, MO  
James Patrick Corcoran, M.D., Downers Grove, IL  
Angela Minnick Court, M.D., Okatie, SC  
Terry Shawn Crombie, M.D., Portland, OR  
Thomas Nathan Crumbley, M.D., Scottsdale, AZ

Gustavo Cuadra, M.D., Largo, FL  
Antonio Cusi, M.D., Fayetteville, NC  
Marija Grba Cutlip, M.D., Pittsburgh, PA  
Susan Elizabeth Czapiewski, M.D., St Louis Park, MN  
Kim-Lan Tran Czelusta, M.D., Houston, TX  
Christopher Anthony D'Agostino, D.O., South Elgin, IL  
Reshma Richard D'Mello, M.D., Newburgh, IN  
Jatin Jagdishbhai Dalal, M.D., Yorba Linda, CA  
Christine Maura Daly, M.D., Tacoma, WA  
Hanumantharao Damerla, M.D., Arcadia, CA  
Melany Marie Danehy, M.D., La Grange Park, IL  
Alexandrina Darabus, M.D., Taunton, MA  
Milton Henry Daugherty, M.D., Chicago, IL  
Robert Dean Davies, M.D., Denver, CO  
Kent Charles Davis, M.D., Sartell, MN  
Robert Marc Davis, M.D., Pittsburgh, PA  
Yelena M. Davydov, M.D., Queens village, NY  
Shandara D. Dawes, M.D., Santa Barbara, CA  
Christopher Michael Deakin, M.D., Williamsville, NY  
Etienne Valere Dehoorne, M.D., Chelsea, MI  
Kenneth Borut Dekleva, M.D., Grand Prairie, TX  
Marites P. Del Rosario, M.D., Lancaster, CA  
Marina F. Demetrashvili, M.D., Atlanta, GA  
Michael Colton Dempsey, M.D., Pontiac, IL  
John Denegre, M.D., Billings, MT  
Komal Ajay Desai, M.D., Bakersfield, CA  
Pradipkumar S. Desai, M.D., Hines, IL  
Rakesh Jayantilal Desai, M.D., Sugar Land, TX  
Kiran Shashi Devaraj, M.D., Charleston, WV  
Nancy Claire Abuyen Devine, M.D., Muskegon, MI  
Jagannath Devulapally, M.D., Hinsdale, IL  
Yeshuschandra R. Dhaibar, M.D., West Orange, NJ  
Alice A. DiBenedetto, M.D., New York, NY  
Ruth Ann Dickinson, M.D., Salt Lake City, UT  
Lucinda DiDomenico, M.D., West Roxbury, MA  
David James Diehl, M.D., Saline, MI  
Robert Benjamin Diener, M.D., Dorchester, MA  
Jeevan Diptee-Rodrigues, M.D., Treasure Island, FL  
Linda Anne Diraimondo, M.D., Madison, WI  
Susan Marie Ditter, M.D., San Jose, CA  
Kara E. Ditto, M.D., Richmond, VA  
Walker Bryan Dixon III, M.D., Portland, OR  
Luz Evangeline S. Dizon, M.D., Brockton, MA  
Donna Christine Dobrowolsky, M.D., Palatine, IL  
Mehmet Emin Dokucu, M.D., Ph.D., Chicago, IL  
Stephen Scott Dominy, M.D., Novato, CA  
Doris Mary Donoghue, M.D., Aptos, CA  
Shelley J. Doumani-Semino, M.D., Phoenix, AZ  
Susan Ruth Downs, M.D., Palo Alto, CA  
Dianna Dragatsi, M.D., Dobbs Ferry, NY  
Todor Tode Dragicevic, M.D., Port Huron, MI

Evelyn Roswitha Driscoll, M.D., Tucson, AZ  
Susan Marie Drymalski, M.D., Reno, NV  
Laurence Evans Du Comb, M.D., Belmont, MA  
Kristen Marie Dunaway, M.D., Portland, OR  
Mitchell Harold Dunn, M.D., Dallas, TX  
Richard Kerry Dyer, M.D., Manhattan, KS  
Georgia Ann Ede, M.D., Northampton, MA  
Sherif El Asyouty, M.D., Santa Barbara, CA  
Mohammed Fawzi El-Awady, M.D., Murphy, TX  
Gloria Ellis, M.D., New York, NY  
Gregory Wilkins Ellis, M.D., Salt Lake City, UT  
Walter Ray Elliston, M.D., Dallas, TX  
Jared Keith Ellman, M.D., Philadelphia, PA  
Jonathan Scott Emens, M.D., Portland, OR  
Bradley James Engwall, M.D., Albany, CA  
Jane Ingrid Epstein, M.D., Chestnut Hill, MA  
Cheryl L. Eschbach, M.D., Ph.D., Decatur, GA  
Sharon Marie Esposito, M.D., Tulsa, OK  
Samuel Omatsola Tosan Etchie, M.D., La Mesa, CA  
Dillon Carmickle Euler, M.D., Brooklyn, NY  
Ael Evan Eyler, M.D., Burlington, VT  
Ria G. Rodriguez Fabunan, M.D., Flushing, NY  
Peter George Fadow, M.D., Wichita Falls, TX  
Amy Dawn Fairchild, M.D., Chapel Hill, NC  
Jay David Falk, M.D., New York, NY  
Emiliya Fardman, M.D., Morganville, NJ  
Donna Brian Fargason, M.D., Baton Rouge, LA  
Alexander Fariborzian, M.D., Gainesville, FL  
Nabila Syeda Farooq, M.D., West Bloomfield, MI  
Rokeya Sultana Farooque, M.D., Nashville, TN  
Joanna Ewa Faryna, M.D., Omaha, NE  
Tasbeeh Fatima, M.D., Pelham, NY  
David Adam Fedoronko, M.D., Darien, CT  
Bradford Laird Felker, M.D., Seattle, WA  
Debra Lynn Fertig, M.D., Chevy Chase, MD  
Michael Alan Finch, M.D., Asheville, NC  
John K. Findley, M.D., Barrington, RI  
Joan Finkelstein, M.D., Nnewton, MA  
Mario Finkelstein, M.D., Tenafly, NJ  
Shabana Firdous, M.D., Sterling, VA  
Steven Victor Fischel, M.D., Ph.D., Springfield, MA  
Kimberly Ann Fitch, M.D., Chanhassen, MN  
Thomas Michael Fitzgerald Jr., M.D., Davidson, NC  
David Flaherty, D.O., Sunrise, FL  
Mark Harry Fleisher, M.D., Omaha, NE  
Deborah Lynne Flores, M.D., Torrance, CA  
Elizabeth Ellen Flynn, M.D., Providence, RI  
Sarah Ann Flynn, M.D., Sioux Falls, SD  
Thomas Francis Flynn, M.D., Portland, OR  
Sylvia Fogel, M.D., New York, NY  
Ron Shihyung Foo, M.D., Loma Linda, CA

Alexandra Catherine Forman-Chou, M.D., Maplewood, NJ  
Jennifer Flamm Fortner, M.D., Loganville, GA  
Jody Jane Foster, M.D., M.B.A., Philadelphia, PA  
Everts Cranson Fox III, M.D., Honolulu, HI  
Fiona Jane Fox, M.D., Chevy Chase, MD  
Thomas Neil Franklin, M.D., Baltimore, MD  
Nancy Jeanne Franzoso, M.D., Boulder, CO  
Lisa Marie Frappier, D.O., Providence, RI  
Adrienne Fratini, M.D., San Rafael, CA  
Dawn Jackson Fyler, M.D., Davidson, NC  
David Mbugua Gacengeci, M.D., Raleigh, NC  
Kenneth Dean Galen, M.D., Las Vegas, NV  
Riqueza Galura Cua, M.D., Tarpon Springs, FL  
Niladri Ganguli, M.D., Great Neck, NY  
Dinu Petru Gangure, M.D., Saint Louis, MO  
Steven Lee Gans, M.D., Winchester, MA  
Joseph Michael Garbely, D.O., Royersford, PA  
Keith Sigmond Garcia, M.D., Ph.D., Austin, TX  
Susan Gardiner, M.D., Delmar, NY  
Patrick Charles Gariety, M.D., Olympia, WA  
Evan Howard Garner, M.D., Mountain View, CA  
Luis Angel Garza, M.D., New York, NY  
Bradley Neil Gaynes, M.D., Chapel Hill, NC  
Alison Meri Gedalowitz, M.D., Scarsdale, NY  
Susan George, M.D., Syosset, NY  
Anna Maria Georgiopoulos, M.D., Newton, MA  
Veena Ghai, M.D., Austin, TX  
Mohammed Shahjahan Ghani, M.D., Cheshire, CT  
Joshua B. Gibson, M.D., Larkspur, CA  
Richard Lee Gibson, M.D., Knoxville, TN  
Roberto B. Gil, M.D., Ardsley, NY  
Akbar Gilani, M.D., Fremont, CA  
Jasleen Gill, M.D., Charlotte, NC  
Honi Lee Gluck, M.D., Fayetteville, NC  
Mukund Gnanadesikan, M.D., Napa, CA  
Eliseo A. Go, M.D., Garden City, NY  
Peter Gobar, M.D., Golden Valley, MN  
Rhonda Russell Goen, M.D., Rockwall, TX  
Richard Jay Goldbaum, M.D., Natick, MA  
Pablo H. Goldberg, M.D., New York, NY  
Lisa Michele Goldfarb, M.D., New York, NY  
Elizabeth Sarah Goldman, M.D., Fort Washington, PA  
Sara Gail Goldman, M.D., Beachwood, OH  
Robert Glen Goldstein, M.D., New York, NY  
Julia Ann Golier, M.D., Bronxville, NY  
Maria Fernanda Gomez, M.D., Englewood Cliffs, NJ  
Hemanjani Gonchigar, M.D., Potomac, MD  
Murali Gopal, M.D., Long Grove, IL  
Raman Nurani Gopalakrishnan, M.D., Media, PA  
Gayle Suzanne Goren, M.D., New York, NY  
Sara M. Gotheridge, M.D., Evanston, IL

Debrin Packer Goubert, M.D., Clackamas, OR  
Joseph S. Goveas, M.D., Menomonee Falls, WI  
Sarah van den Hoek Graff, M.D., Irvine, CA  
David Peter Graham, M.D., Houston, TX  
Diana R. Graham, M.D., Raleigh, NC  
Mark Alan Graham, M.D., Fayetteville, NC  
Jon Edgar Grant, M.D., Chicago, IL  
Thomas Gabor Gratzner, M.D., Edina, MN  
Garrett Van Antwerp Graves Jr., M.D., Lemington, VT  
Sonja Gray, M.D., New Providence, NJ  
Heidi Louise Green, M.D., Raleigh, NC  
Glyn Carol Griffin, M.D., Woodside, CA  
Kristy Marie Griffith, M.D., Tulsa, OK  
Todd Richardson Griswold, M.D., Carlisle, MA  
Michael Case Groner, M.D., Woodbridge, CT  
Mark Summers Groves, M.D., Brooklyn, NY  
Ramakrishna Gudapati, M.D., Paramus, NJ  
Kurt Guindon, M.D., Omaha, NE  
Doris Christine Gundersen, M.D., Denver, CO  
Karl Raymond Gundersen, M.D., Saint Louis, MO  
Sharad Gupta, M.D., Hoffman Estates, IL  
Sunita Gupta, M.D., Alpharetta, GA  
Jolanta Gurdek, M.D., Albuquerque, NM  
Rinah Irene Gutierrez, M.D., Kennewick, WA  
Naomi H. Gwynn, M.D., New York, NY  
Wade Allen Hachinsky, D.O., Lees Summit, MO  
Fatima Mehjabeen Hadi, M.D., Saint Charles, IL  
Mark Richard Hager, M.D., Valrico, FL  
Phyllis Elisabeth Hager, M.D., Palmyra, VA  
Chang-Gyu Hahn, M.D., Ph.D., Bryn Mawr, PA  
Adrienne Kimberly Hall, M.D., Sacramento, CA  
John David Hall, M.D., Charlotte, NC  
Stephanie Zoeller Hall, M.D., Louisville, KY  
Stephen Elihu Hall, M.D., San Francisco, CA  
Yvonne de Guadalupe Hall Gomez, M.D., Rio Rancho, NM  
Marilynn Klein Hammond, M.D., Topton, NC  
Jaesu Han, M.D., Davis, CA  
Samuel Patton Hand, M.D., Phoenix, AZ  
Benita Handa, M.D., Burlington, MA  
Constance Margo Hanes, M.D., Chapel Hill, NC  
Yoshiko N. Hapke, M.D., Saint Paul, MN  
George Lynn Hardman, M.D., Sherborn, MA  
James Gregory Harold, M.D., Longview, TX  
Ari Joel Harrison, M.D., Santa Rosa, CA  
Yaprak Egilmez Harrison, M.D., Dallas, TX  
Jonathan Lincoln Harry, M.D., Catheys Valley, CA  
Bert A. Hartman, M.D., Whites Creek, TN  
Kenneth Hashman, M.D., Calgary, AB  
Stephen Meredith Hawk, D.O., D.F.A.P.A., Saint Petersburg, FL  
Ann Elizabeth Hedberg, M.D., Richmond, VA  
Eric Jon Heidenreich, M.D., Coeur d' Alene, ID



Badalin Helvink, M.D., Rancho Santa Fe, CA  
John Paul Hennessee, M.D., Oklahoma City, OK  
Michael Ernest Henry, M.D., Northborough, MA  
Stafford Christopher Henry, M.D., Chicago, IL  
Adriana Patricia Hermida, M.D., Atlanta, GA  
Denise Hernandez, M.D., Arvada, CO  
Jose A. Hidalgo, M.D., Watertown, MA  
John Anthony Hinck, M.D., Hanover, NH  
Osama Saad Hindash, M.D., Roswell, GA  
Anil Raghunathprasad Hinnaria, M.D., Fairfax, VA  
Tiffany B. Ho, M.D., San Jose, CA  
Nicholas Hoeh, M.D., Bordentown, NJ  
Susan Lee Hoerter, D.O., Pearl River, NY  
Matthew Seth Holden, M.D., New York, NY  
Daniel Philipp Holschneider, M.D., Los Angeles, CA  
Mady Hornig, M.D., New York, NY  
Mark Lewis Hoskin, M.D., Shelburne, VT  
Angela Chevelle Houston, M.D., Oklahoma City, OK  
Frederick Yuh Huang, M.D., San Francisco, CA  
Edward Denmead Huey, M.D., Larchmont, NY  
Jeffery Clifton Huffman, M.D., Boston, MA  
Nedim Hukovic, M.D., Ph.D., Ogdensburg, NY  
Michael Elwin Hunt, M.D., Perry, MI  
Janet Lynne Hunter, M.D., Dahlonega, GA  
Jason William Hunziker, M.D., Salt Lake City, UT  
Cheryl Lynn Hurd, M.D., Fort Worth, TX  
Grace Efiok Inyang, M.D., Clinton, MD  
Susan Yuri Ishiyama, M.D., North Royalton, OH  
Michelle S. Izmirly, D.O., New York, NY  
Yadollah Mahmood Jabbarpour, M.D., Salem, VA  
Shagufta Jabeen, M.D., Brentwood, TN  
Jeffrey Alan Jacobs, M.D., Knoxville, TN  
Sunil B. Jacques, M.D., Orinda, CA  
Syed Hadi Jafar, M.D., San Diego, CA  
Shakuntala Jain, M.D., Chandler, AZ  
Vivek Jain, M.D., Tacoma, WA  
Cynthia Tabligan Jalandon, M.D., Dumont, NJ  
Martha Lee James, M.D., Philadelphia, PA  
Cynthia A. Janes, M.D., Nashville, TN  
Ashhal Mohamed Jastaniah, M.D., Kingston, MA  
Jeffery Lee Jenkins, M.D., Stilwell, OK  
Steven Mark Jenkusky, M.D., Albuquerque, NM  
Geraldine Victoria Jerome, M.D., Loveland, CO  
Jason Matthew Jerry, M.D., Chagrin Falls, OH  
Martin Thomas Johnson, M.D., Marietta, GA  
Nicole Reid Johnson, M.D., Ashton, MD  
Douglas Howard Jones, M.D., Swisher, IA  
Jason Guilford Jones, M.D., Belmont, MA  
David Brent Joye, M.D., Lookout Mountain, TN  
Beth Amelia Judge, M.D., San Diego, CA  
Samuel Lawrence Judice, M.D., San Francisco, CA

Timothy Michael Juergens, M.D., Madison, WI  
Kulsoom Fatima Junaid, M.D., Town And Country, MO  
Levi Isaac Kahane, M.D., Hollywood, FL  
Kristopher Edward Kaliebe, M.D., New Orleans, LA  
Masoud Kamali, M.D., Ann Arbor, MI  
Kyle Matthew Kampman, M.D., Philadelphia, PA  
Przemyslaw Les Kapalczynski, M.D., Bay Village, OH  
Polina Kaplunsky, M.D., Buffalo Grove, IL  
Gillian Kay Karatinos, M.D., Tampa, FL  
Kristin Angelie Kassaw, M.D., Houston, TX  
Michal Maciej Kassur, M.D., Johns Island, SC  
Lucia Cecilia Katz, M.D., Philadelphia, PA  
Jeffrey William Katzman, M.D., Albuquerque, NM  
Ramandeep Kaur, M.D., Alamo, CA  
Batool Kazim, M.D., Westborough, MA  
Thomas Lee Keister Jr., M.D., New Orleans, LA  
Susan M. Kelly, M.D., North Easton, MA  
Christopher Concannon Kennedy, M.D., Harvard, MA  
Shira Amitai Keri, M.D., La Jolla, CA  
Asha Keshavan, M.D., Westwood, MA  
Thomas John Keul, M.D., Roseville, MN  
Susanna Khachatryan, M.D., Glendale, CA  
Maureen Williams Khalil, M.D., Prospect, KY  
Khizar Ali Khan, M.D., Ellicott City, MD  
Mujahid A. Khan, M.D., Princeton, NJ  
Navaid Ahmed Khan, M.D., M.P.H., Sun City West, AZ  
Shahbaz Muhammad Khan, M.D., Leawood, KS  
Tehmina Amjad Khan, M.D., Louisville, KY  
Namita Khanna-Arora, M.D., Madison, MS  
Kishore Anil Khot, M.D., Cape Girardeau, MO  
Daniel Young-Joong Kim, M.D., Chicago, IL  
Emily Kim, M.D., Boston, MA  
Jason Jeho Kim, M.D., New York, NY  
James Leroy Kimball III, M.D., Salt Lake City, UT  
Ravi S. Kirbat, M.D., Ann Arbor, MI  
Debra Frances Kirsch, M.D., Parkland, FL  
Jorge N. Kirshtein, M.D., New York, NY  
David Abram Klein, M.D., Glenwood Landing, NY  
Patti S. Klein, D.O., New York, NY  
Lynn Marie Klimo, M.D., Tucson, AZ  
Jeffrey James Knowles, M.D., Sacramento, CA  
Elizabeth Louise Koenig, M.D., Bellevue, WA  
Mia Clara Kogan, M.D., Washington, DC  
Ramesh Konakanchi, D.O., Orchard Park, NY  
Anne Irene Koplin, M.D., Milwaukee, WI  
Ren,e Christine Koronkowski, M.D., Blaine, MN  
Manjula Kottapalli, M.D., Solon, OH  
Raymond James Kotwicki, M.D., Atlanta, GA  
Regina Koziyevskaya, M.D., Waban, MA  
Markus Kraebber, M.D., New York, NY  
Nanditha Krishnamsetty, M.D., Monroe Twp, NJ

Michael Robert Kronen, M.D., Silver Spring, MD  
Thomas William Kuhn, M.D., Holland, MI  
Pradeep Kumar, M.D., Plano, TX  
Shribala Kumar, M.D., Rolling Hills Estates, CA  
Richard H. Kumet, M.D., Vail, AZ  
Marc Willis Kundler, M.D., Austin, TX  
Jelena Kunovac, M.D., Oceanside, CA  
Peggy Kwun, M.D., Mill Valley, CA  
Zev William E. Labins, M.D., New York, NY  
Louella Chan Ladia, M.D., Escondido, CA  
Jesus Angel Lago, M.D., Purchase, NY  
Rozina Lakhani, M.D., M.P.H., Mill Creek, WA  
Naomi Kiyoko Lam, M.D., San Francisco, CA  
Graciana Lapetina, M.D., New York, NY  
Kathleen G. Lapp, M.D., Chapel Hill, NC  
Richard Michael Lasarow, M.D., Valley Village, CA  
Tracy Thompson Latz, M.D., Mooresville, NC  
John Charles Lauer, M.D., Mattoon, IL  
Meg Depender Lawrence, M.D., San Diego, CA  
Anne Lyon League, M.D., Colorado Springs, CO  
Mary Rachel Lee, M.D., Washington, DC  
Royce J. Lee, M.D., Chicago, IL  
Susan Neely Legacy, M.D., Kendall Park, NJ  
Jonathan Eaton Leinbach, M.D., Durham, NC  
Eduardo David Leonardo, M.D., Ph.D., River Edge, NJ  
Kenneth G. Lerner, M.D., Manchester, NH  
Laura Leso, M.D., Homer, NY  
Pejman David Leviadin, M.D., Beverly Hills, CA  
Larisa Levin, M.D., Beverly Hills, CA  
Oren Isaac Levin, M.D., Geneva, IL  
Amir A. Levine, M.D., New York, NY  
Michael Uri Levinson, M.D., San Francisco, CA  
Elliott Evens Levy, M.D., Charleston, SC  
Donna Ellen Lewinter, M.D., New York, NY  
Judith Lynne Lewis, M.D., Charlotte, VT  
Stephen Frederick Lewis, M.D., Albuquerque, NM  
Jordan Allan Lieberman, M.D., Yardley, PA  
Edward Mina Lim, M.D., El Dorado Hills, CA  
Lisa Ann Lindquist, D.O., Sicklerville, NJ  
Richard Gordon Listerud, M.D., Uxbridge, MA  
J. Scott Littleton, M.D., Alvaton, KY  
Louis Littman, M.D., Ph.D., Sicklerville, NJ  
Feng Liu, M.D., Scarsdale, NY  
David Baird Loboza, M.D., New Gloucester, ME  
Michelle Renee Lofwall, M.D., Lexington, KY  
Anita M. Lopker, M.D., Westport, CT  
Brent Roger Lovett, M.D., Naples, FL  
Xiu Ruo Lowe, M.D., Castro Valley, CA  
Darryl Lucia, M.D., San Jose, CA  
Yanik Lourdes Luis-Roig, M.D., Melbourne, FL  
Daniella Dorothy Lukashok, M.D., New York, NY

Christopher Joseph Lukonis, M.D., Rochester, VT  
Thomas D. Lupton, M.D., San Francisco, CA  
David J. Lynn, M.D., River Forest, IL  
David Edward Lyon, D.O., Holt, MI  
Kaimana Scott MacDonald, M.D., San Diego, CA  
Kanchana Mala Madhavan, M.D., Farmington Hills, MI  
Maureen Frances Magauran, M.D., North Andover, MA  
Michael John Magera, M.D., Westfield, NJ  
Jack Armen Mahdasian, M.D., Ada, MI  
Michael Joseph Mahelsky, M.D., New York, NY  
Elizabeth Joan Mahler, M.D., Portola Valley, CA  
Abdul Majid Malik, M.D., Granger, IN  
Mansoor Ahmed Malik, M.D., Silver Spring, MD  
Nitin Malik, M.D., Austin, TX  
PaulaJo Malin, M.D., Papillion, NE  
Richard Wayne Malis, M.D., Northbrook, IL  
Litos O. Mallare, M.D., Malibu, CA  
David Bruce Mallott, M.D., Baltimore, MD  
Ann Elizabeth Maloney, M.D., Shrewsbury, MA  
Maia Mamamtavrishvili, M.D., New York, NY  
Jyothi Mandava, M.D., Town And Country, MO  
Omar Sharif Manejwala, M.D., Matthews, NC  
Anjali Mangat, M.D., Aliso Viejo, CA  
Mehul Vipul Mankad, M.D., Chapel Hill, NC  
Josefina Manzano, M.D., Wellington, FL  
Lori Faye Marantz, M.D., North Tustin, CA  
William Albert Marcil, M.D., Elkhorn, NE  
Judith Tamarah Marcus, M.D., Swarthmore, PA  
Shaheda Fatima Maroof, M.D., Raleigh, NC  
Ardis Capprice Martin, M.D., Colorado Springs, CO  
Laura Martin, M.D., Denver, CO  
John Scott Martin-Joy, M.D., Watertown, MA  
Melisa Ybarra Martinez, M.D., Zionsville, IN  
Maureen D. Martino, M.D., New York, NY  
Monique Masse, M.D., Poway, CA  
Adriana Mateoc, M.D., Brooklyn, NY  
Shila Jacob Mathew, M.D., Hudson, OH  
Robert Kepler Matlack Jr., M.D., Fayetteville, NC  
Courtenay Ruriko Matsu, M.D., Honolulu, HI  
Suneetha Mattegunta, M.D., Goldsboro, NC  
Scott Christian Matthews, M.D., San Diego, CA  
Bryan Scot Maulden, M.D., Sandy, UT  
Earl John Delacruz Mauricio, M.D., Walpole, MA  
Rebecca Helena Maxwell, M.D., Pearland, TX  
Robin May-Davis, M.D., Austin, TX  
Richard Mayer, M.D., Teaneck, NJ  
Robert Michael McCarron, D.O., Davis, CA  
Richard Lones McColl, M.D., Leander, TX  
William Edward McCollum, M.D., Rogers, AR  
Charles H. McDaniel, M.D., Los Angeles, CA  
Marcia Strickland McDonald, D.O., Shell Beach, CA

Linda Frances McDonnaugh, M.D., Ph.D., Wichita, KS  
Bethany Ann McGovern, M.D., Anderson, IN  
Bryan James McGreal, M.D., New York, NY  
Judythe Schott McKay, M.D., M.P.H., Asheville, NC  
Margaret Alverta McKeathern, M.D., Rockville, MD  
Laurie May McPearce, M.D., St Thomas, VI  
Karen Ann Medzoyan, M.D., Lebanon, PA  
Radhika Mehendru, M.D., Glastonbury, CT  
Raveen Mehendru, M.D., Glastonbury, CT  
Shital Tapan Mehta, M.D., Bourbonnais, IL  
Allison Marie Meisner, M.D., Roseville, CA  
Sergio Mejia, M.D., West Hartford, CT  
Ali Mohamad Melhem, M.D., Pittsburgh, PA  
George John Melnyk, M.D., La Crosse, WI  
Alejandro Y. Mendoza, M.D., North Easton, MA  
Amy K. Metzger, M.D., Napa, CA  
Margaret Stirling Meyer, M.D., Austin, TX  
Jane Frances Novak Miceli, M.D., Denver, CO  
Leszek Michalewicz, M.D., Kenner, LA  
Athanasios Anastasio Mihas, M.D., Redlands, CA  
Keith Eugene Miller, M.D., Denver, CO  
Galina Mindlin, M.D., New York, NY  
Devra Caryn Mintz, M.D., Weston, FL  
Maurie Lynn Mintz, M.D., Decatur, GA  
Adam Michael Mirot, M.D., Longmeadow, MA  
Michael A.V. Mirzai, M.D., Bismarck, ND  
Kerry E. Mitchell, M.D., Menlo Park, CA  
Dinesh Mittal, M.D., Little Rock, AR  
John Steven Mogerman, M.D., Ann Arbor, MI  
Khaled Ibrahim Mohamed, M.D., White Plains, NY  
Manoj K. Mohata, M.D., Merion Station, PA  
Faisal Mohsin, M.D., Yorktown, VA  
Farooq Mohyuddin, M.D., Alexandria, VA  
Zaki Moin, M.D., Sugar Land, TX  
Sylvia Patricia Montesinos, M.D., Jacksonville, FL  
Lyle Barnes Montgomery, M.D., Gautier, MS  
Sumi Moon, M.D., Providence, RI  
Stephen Thomas Moran, M.D., Bangor, ME  
Charles Joseph Moreau, M.D., La Jolla, CA  
Jennifer Michelle Morris, M.D., Edmond, OK  
Marcia Ruth Morris, M.D., Ocala, FL  
Caroline Margaret Morrison, M.D., Naperville, IL  
Mary Frances Morrison, M.D., Wynnewood, PA  
Jeffrey Hale Morse, M.D., Norfolk, VA  
Jennifer Sheraden Morse, M.D., Rancho Santa Fe, CA  
Kathryn Moss, M.D., New York, NY  
Charles Duke Motsinger, M.D., Arlington, VA  
Lynn Marie Mousel, M.D., Great Falls, MT  
Anne Elizabeth Moylan, M.D., M.P.H., Ipswich, MA  
Koushik Mukherjee, M.D., Presto, PA  
Beth Logan Murphy, M.D., Ph.D., Arlington, MA

Jagadeeswara Rao Musunuru, M.D., Fond Du Lac, WI  
Shivani Myer, M.D., White Marsh, MD  
Nishad J. Nadkarni, M.D., La Grange Park, IL  
Padmini Nagaraj, M.D., Kenner, LA  
Linda Bess Nahulu, M.D., Honolulu, HI  
Richard M. Naimark, M.D., Rye, NH  
R. Luke Napier, M.D., Halifax, NS  
Muhammad Omar Nasib, M.D., Downers Grove, IL  
Richard Andrew Nathanson, M.D., New York, NY  
Shah Nawaz, M.D., Newtown, CT  
Victoria Nee, M.D., Chicago, IL  
Edward Joseph Neidhardt, M.D., Santa Fe, NM  
Douglas Alan Nemecek, M.D., Eden Prairie, MN  
Neviana Iordanova Nenov, M.D., Ph.D., Davie, FL  
Antonia Silva New, M.D., Scarsdale, NY  
Audrey Riker Newell, M.D., Ann Arbor, MI  
Donald Jeffrey Newport, M.D., Sunny Isles Beach, FL  
Charles Tuan-Tu Nguyen, M.D., Irvine, CA  
Cuc Thu Nguyen, M.D., Mercer Island, WA  
Eric Huy Nguyen, M.D., Santa Ana, CA  
Mikhail V. Nickita, M.D., Manhasset, NY  
Joshua Niclas, M.D., San Quentin, CA  
Rajendra Kumar Nigam, M.D., Sewickley, PA  
Sanjay Kumar Nigam, M.D., Edwardsville, IL  
Wanjiku Njoroge, M.D., Kansas City, MO  
Stephen George Noffsinger, M.D., Hudson, OH  
Devereaux Lashonti Nollie, M.D., Corpus Christi, TX  
Terrence John Norton Jr., M.D., Dubuque, IA  
Hatem Ahmed Nour El Deen, M.D., El Paso, TX  
Giovanny Merices Nunez, M.D., Valley Stream, NY  
Thomas Boyd Nutter III, M.D., Elmhurst, IL  
Karen O'Flynn, M.D., Collinsville, CT  
Aruby Odom-White, M.D., Philadelphia, PA  
Nnenna Kalaya Okereke, M.D., White Plains, NY  
Ashraf Mohamed Oloufa, M.D., Gainesville, FL  
Christine Anne Olson, M.D., Deerfield, IL  
Judith Elizabeth Olson, M.D., Keene, NH  
Alphonse Daniel Osinski, M.D., Mount Kisco, NY  
Britta Ostermeyer, M.D., Oklahoma City, OK  
Fortunate Ehi Ovbiagele, M.D., Greenville, AL  
Charles Vincent Panadero, M.D., Rocklin, CA  
Daud Mohammad-Masood Panah, M.D., Atlantic City, NJ  
Shantha Grace Pandian, M.D., Johnson City, TN  
Sujatha Pandian, M.D., Sewickley, PA  
Aimee Lee Paniagua-Ryan, M.D., Rye, NY  
Azra Naveen Pappa, D.O., Aurora, IL  
Jacqueline Denise Pardo, M.D., Chicago, IL  
Asha Parekh, M.D., Newton, MA  
Bhadreshkumar H. Parikh, M.D., Tamarac, FL  
Charles W. Park, M.D., Morristown, NJ  
Jennifer M. Park, M.D., McLean, VA

Sandra W. Park, M.D., New York, NY  
James Adam Parker, M.D., Mercer Island, WA  
Joanne Gail Parks, M.D., Barrington, IL  
Harish K. Patel, M.D., Girard, OH  
Smitha Patel, M.D., Powell, OH  
Tejaskumar Babulal Patel, M.D., Johnstown, PA  
Praveen Chandra Pathak, M.D., Orlando, FL  
Maria Patrascu, M.D., Farmington, CT  
James Clifton Patterson II, M.D., Ph.D., Shreveport, LA  
Anca Daniela Paunica, M.D., Wezembeek-Oppem, n/a  
Venus C. Paxton, M.D., San Diego, CA  
Victoria Mitchell Payne, M.D., Rougemont, NC  
Roger Ray Peebles, D.O., Arlington, VA  
Roger Peele, M.D., Rockville, MD  
Eduardo Ignacio Pena, M.D., West Palm Beach, FL  
Stephen Thomas Penepacker, M.D., Buffalo Grove, IL  
Tarique Dhyhan Perera, M.D., New Fairfield, CT  
Carol Bezirgianian Perez, M.D., Fairfax, VA  
Catherine Bost Peters, M.D., Atlanta, GA  
Jason Andrew Petrilla, M.D., Waban, MA  
Janis Bacon Petzel, M.D., Islesboro, ME  
Kinh Luan Dinh Phan, M.D., Oak Park, IL  
Alison Cooper Phillips, M.D., Wellesley, MA  
Stephen Mark Pickstone, M.D., Columbus, OH  
Andrei A. Pikalov, M.D., Ph.D., Kinnelon, NJ  
Edward Poa, M.D., Houston, TX  
Mordecai Natan Potash, M.D., New Orleans, LA  
Traci Elcan Powell, M.D., Chicago, IL  
Steven E. Pratt, M.D., Lino Lakes, MN  
Shoshanna Adine Press, M.D., Seattle, WA  
Mark Allen Preston, M.D., West Des Moines, IA  
Lucy Woltz Preyer, M.D., Charleston, SC  
Bryan David Price, M.D., Atlanta, GA  
Michael Thomas Price, M.D., Augusta, ME  
Susana Emelina Prieto, M.D., Miami, FL  
Gary Ray Proctor, M.D., Ponte Vedra Beach, FL  
Louis Augustino Profenno, M.D., Syracuse, NY  
Danielle Marie Pyevich, M.D., scottsdale, AZ  
Jacqueline Jazmine Pynn, M.D., Mesa, AZ  
Stephan Jeremy Quentzel, M.D., Englewood, NJ  
Seema Quraishi, M.D., New York, NY  
Terry Rabinowitz, M.D., Charlotte, VT  
Andrea Lynn Raby, D.O., Chandler, AZ  
Anthony Angelo Racaniello, M.D., Hoboken, NJ  
Alina Rahel Rais, M.D., Sylvania, OH  
Anthony Valentine Raiteri, M.D., New York, NY  
Kanthi Penmatcha Raju, D.O., Richardson, TX  
Dharmindra Ramaiya, M.D., Gilbert, AZ  
Amruthur Gita Ramamurthy, M.D., Ithaca, NY  
Michael Scott Ramsey, D.O., Seattle, WA  
Sohail Anjum Rana, M.D., Marlton, NJ

Aruna S. Rao, M.D., Baltimore, MD  
Balakrishna Mohan Rao, M.D., Tampa, FL  
Sheila C. Rao, D.O., Lemont, IL  
Sonya Rachel Rasminsky, M.D., Irvine, CA  
Kaushik Jitendra Raval, M.D., Saginaw, MI  
David Frank Ray, M.D., Cape Elizabeth, ME  
Christine E. Rayner, M.D., Providence, RI  
Kathleen M. Regan, M.D., Midland, MI  
Lance Boyd Reger, M.D., Charlotte, NC  
Zafar Rehmani, M.D., Chesterfield, MO  
Shauna Pencer Reinblatt, M.D., Baltimore, MD  
Martin Javier Repetto, M.D., Ph.D., Champaign, IL  
Cecille Herrera Reuther, M.D., Portland, OR  
David Neal Reynolds, M.D., New York, NY  
Kelly Barbara Rhoadarmer, M.D., Indianapolis, IN  
John Lanier Rice, M.D., Asheville, NC  
Madhvi Phadtare Richards, M.D., Okemos, MI  
Elbert Greer Richardson Jr., M.D., Chester, CT  
Muhamad Aly Rifai, M.D., Easton, PA  
Robert John Riley, M.D., Baltimore, MD  
Maricel Rios-Gonzalez, M.D., Guaynabo, PR  
Joy Dana Riskin, M.D., Brookline, MA  
Lisa Ilene Robbins, M.D., Short Hills, NJ  
Margaret Shippen Robbins, M.D., Johnson City, TN  
Doreen Elizabeth Robertson-Hoffmann, M.D., Bernardsville, NJ  
Wilfredo Rodriguez, M.D., Greenville, NC  
Iris E. Rodriguez-Delgado, M.D., Carolina, PR  
Mary Hasbah Roessel, M.D., Santa Fe, NM  
Nadine Elizabeth Rogers, M.D., Hatboro, PA  
Barbara Marie Rohland, M.D., Rochester, MN  
Pamela Rootenberg, M.D., Media, PA  
Vernon Anthony Rosario II, M.D., Ph.D., Los Angeles, CA  
Steven R. Rosen, D.O., Centerville, OH  
Mathilde H. Ross, M.D., Boston, MA  
Rachel Pamela Ross, M.D., Del Mar, CA  
Heather Mary Rowe, M.D., Opelika, AL  
Boris Royak, M.D., Pepper Pike, OH  
Teresita Dumo Ruiz, M.D., Floral Park, NY  
Roxana Ruizcaro-Chavez, M.D., Queens Village, NY  
Tilla Friederike Ruser, M.D., Hartford, CT  
David Alan Ruskin, M.D., Seattle, WA  
Daniel Benjamin Saal, M.D., Ph.D., Palo Alto, CA  
Saima Sabah, M.D., Oak Brook, IL  
Laura Teresa Safar, M.D., Boston, MA  
Henry Archer Sakow, M.D., Leary, GA  
Kazi M. Salahuddin, M.D., Lincoln, RI  
Arifa Salam, M.D., Prosper, TX  
Naheed Saleem, M.D., Virginia Beach, VA  
Betty Jo Salmeron, M.D., Towson, MD  
Majid Samad, M.D., East Meadow, NY  
Eric Alan Samstad, M.D., Monkton, MD



Steven C. Samuels, M.D., Ridgewood, NJ  
Jose Arturo Sanchez-Lacay, M.D., Palisades Pk, NJ  
Roy Quincy Sanders, M.D., Decatur, GA  
Honora Manning Sandifer, M.D., Gray, TN  
Ioana Corina Sandu, M.D., Morton Grove, IL  
Maritza Santana-Garcia, M.D., Watertown, NY  
Amy Noelle Saracino, D.O., Harrisburg, PA  
Ankur U. Saraiya, M.D., New York, NY  
Archna Sarwal, M.D., Staten Island, NY  
Maya Sastry, M.D., Fremont, CA  
Norma Cecilly Saunders, M.D., Wellington, FL  
Thomas Risdon Scales, M.D., Nashville, TN  
David Scott Schaefer, M.D., Saint George, UT  
Michele Nicole Schaefer, M.D., Concord, NC  
Sandra Lee Schank, M.D., West Sacramento, CA  
Paul David Schefflein, M.D., Cortlandt Mnr, NY  
Brian Charles Schief, M.D., Johns Creek, GA  
Rosanne Schipani, M.D., Andover, MA  
Max Herbert Schubert, M.D., Temple, TX  
Jonathan Carl Schwartz, M.D., Hanover, NH  
Robert Michael Schweitzer, M.D., Indianapolis, IN  
Catherine Scott, M.D., Venice, CA  
Jennifer Uhl Scott, M.D., Melbourne, FL  
Lisa Jeanann Scott, M.D., Atascadero, CA  
Vadim G. Sechkin, M.D., Bedford, MA  
Sunandha Sekar, M.D., Pinecrest, FL  
Kathryn Kim Selmo, M.D., Minneapolis, MN  
Renee Won Seto, M.D., Long Island City, NY  
Janet Elizabeth Settle, M.D., Denver, CO  
Bryan Norbert Sewing, D.O., Saint Louis, MO  
Lisa Sou Seyfried, M.D., Ann Arbor, MI  
Jonathan Gershon Shack, M.D., Bala Cynwyd, PA  
Bindi Shah, D.O., Upper Montclair, NJ  
Pritesh J. Shah, M.D., Franklin Lakes, NJ  
Revathi Shanmugham, M.D., Guttenberg, NJ  
Angela Patrice Shannon, M.D., Atlanta, GA  
Sanjay Mahesh Sharma, M.D., Decatur, GA  
Susan Sharp, D.O., Parkville, MO  
Joseph McConnico Sharpe, M.D., Nashville, TN  
Amie Lynn Sharrits, M.D., Raleigh, NC  
William Patrick Sheehan, M.D., Honolulu, HI  
Fauzia Ghazanfar Sheikh, M.D., Shippensburg, PA  
Shabnum Hamid Sheikh, M.D., Saline, MI  
Daniel Paul Sheneman, M.D., Richmond, VA  
David M. Sherman, M.D., New York, NY  
Michael A. Shiekh, M.D., Dallas, TX  
Renu R. Shishodia, M.D., Murrieta, CA  
Vivian Chern Shnaidman, M.D., Princeton, NJ  
Michael Samuel Shrift, M.D., Carmel, IN  
Dana Lynn Sibilsky, M.D., Hoschton, GA  
Mian A. Siddique, M.D., Brooklyn, NY

Kiran Fatima Siddiqui, M.D., Irving, TX  
Lisa Aronow Siegal, M.D., Great Neck, NY  
Donna Christine Sigurdson, M.D., Minneapolis, MN  
Eleonora Sikic-Klisovic, M.D., Columbus, OH  
David Alan Silbersweig, M.D., Chestnut Hill, MA  
Adam Jonathan Silk, M.D., Brookline, MA  
Lee David Silverman, M.D., Darby, PA  
Xiomara A. Simmons, M.D., Canton, OH  
Amarpreet Singh, M.D., Alamo, CA  
Sabina Singh, M.D., New York, NY  
Sarita Singh, M.D., New York, NY  
Vivek Singh, M.D., San Antonio, TX  
Nalin Kumar Sinha, M.D., New Hartford, NY  
Dorothy K.Y. Sit, M.D., Pittsburgh, PA  
John Robert Skulstad, M.D., Denver, CO  
Kenneth Ray Sladkin, M.D., Brandon, FL  
Sharon Louise Smart, M.D., Ph.D., San Francisco, CA  
Annette Marie Smick, M.D., Saint Charles, MN  
Art Glenn Smith, M.D., Denton, TX  
Barbara Ann Smith, M.D., Ph.D., Coronado, CA  
Blake Devor Smith, M.D., Medfield, MA  
Deborah Anne Smith, M.D., Olympia, WA  
Jill Kristin Smith, M.D., Santa Monica, CA  
Marshall Henry Smith, M.D., San Antonio, TX  
Rebecca Pringle Smith, M.D., New York, NY  
Robert Mathew Smith, M.D., New York, NY  
Lisa Renee Snow, M.D., Maumelle, AR  
Marjorie Blue Snyder, M.D., Hampden, ME  
Ana Imelda Soares, M.D., Davis, CA  
Preeti Sodhi, M.D., Dallas, TX  
Joanette Sorkin, M.D., Benicia, CA  
James Harrison Sorrell, M.D., Omaha, NE  
Meg Winifred Sosnow, M.D., Summit, NJ  
Tasha Souter, M.D., Palo Alto, CA  
Andrew Lincoln Spitznas, M.D., Johnson City, TN  
Adam David Spivack, M.D., Guilford, CT  
Arielle Doree Stanford, M.D., Boston, MA  
Norman Scott Stehle, M.D., Wynnewood, PA  
Joanna • owyn Steinglass, M.D., New York, NY  
David Steinman, M.D., Bala Cynwyd, PA  
Susan Stern, M.D., Chicago, IL  
Jayne Maree Stevenson, M.D., Boise, ID  
Timothy Thomas Stock, M.D., Richardson, TX  
Mary J. Stoller, M.D., Mountain House, CA  
Michael B. Stotler, M.D., Webster Groves, MO  
Nathan Robert Strahl, M.D., Chapel Hill, NC  
Bimmie Price Strausser II, M.D., San Francisco, CA  
Christopher Douglas Streeter, M.D., Boise, ID  
David Keith Strickland, M.D., Westminster, MD  
Monica Lee Strobe, M.D., Seattle, WA  
Samuel Timothy Stroupe, M.D., New York, NY

Elizabeth Jean Stuart, M.D., San Francisco, CA  
Jinae Su, M.D., Redlands, CA  
Joseph K. Sunny, M.D., Cape Girardeau, MO  
David Christopher Sutherland, M.D., Ph.D., San Francisco, CA  
Larry Remigi Sutter, M.D., Carmel, CA  
Danielle Charmaine Suykerbuyk, D.O., Grovetown, GA  
Jeff Thomas Svoboda, M.D., Sunnyvale, CA  
Edward Joseph Swanton, M.D., Fulton, MD  
Daniel Donald Swartz, M.D., Madison, AL  
Pamela Eve Swedlow, M.D., Berkeley, CA  
Eileen Anne Sweeney, M.D., Rockville Centre, NY  
Boglarka Szabo, M.D., Cockeysville, MD  
Anthony Charles Tabacco, M.D., Worcester, MA  
Rex Eugene Taber, M.D., Walnut Grove, MO  
Fatimah A. Tahil, M.D., Brookside, NJ  
Rongrong Tao, M.D., Falls Church, VA  
Mary Connell Tarail, M.D., South Hadley, MA  
Katarina Mina Tasic, M.D., Long Beach, CA  
Hamid R. Tavakoli, M.D., Norfolk, VA  
Stephan Floyd Taylor, M.D., Ann Arbor, MI  
Luven Marie Sequerra Tejero, M.D., Ann Arbor, MI  
Vatsal G. Thakkar, M.D., Fairfield, CT  
Mugdha Ekanath Thakur, M.D., Chapel Hill, NC  
Arthur Thalassinis, M.D., Columbus, OH  
Purushottam Bhadra Thapa, M.D., Little Rock, AR  
Paul Douglas Thielking, M.D., Salt Lake City, UT  
Christopher Reveley Thompson, M.D., Los Angeles, CA  
Louise Marion Thurman, M.D., Oklahoma City, OK  
Christian Conrad Thurstone, M.D., Denver, CO  
Mary Wentworth Tibbetts, M.D., South Gardiner, ME  
Carlos Francisco Tirado, M.D., Austin, TX  
David H. F. Tom, M.D., Honolulu, HI  
Ana Isabel Torres-Martin, M.D., San Juan, PR  
Jayne F. Trachman, M.D., Jamaica Plain, MA  
Fabien Tremeau, M.D., Edgewater, NJ  
Michael Tress, M.D., Weatogue, CT  
William Rand Trimble, M.D., Tucson, AZ  
Kathleen Anne Trott, M.D., Milwaukee, WI  
Tatyana Pavlovna Tsipursky, M.D., Valley Stream, NY  
Kevin Turner, M.D., Jackson, TN  
Susan Turner, M.D., New York, NY  
Audrey Robin Tyrka, M.D., Ph.D., Providence, RI  
Aniedi Etukudo Fred Udofa, M.D., Baton Rouge, LA  
Shantala Umashankar, M.D., Madison, CT  
Jos, Jesús Urdaneta, M.D., Phoenix, AZ  
Liana Krystinne Urfer, M.D., Vero Beach, FL  
Juan Carlos Urizar, M.D., San Antonio, TX  
Amy Marie Ursano, M.D., Chapel Hill, NC  
Vaishnavi Vaddigiri, M.D., Plainview, NY  
Helen Vafaie, D.O., Strongsville, OH  
Michael Nicholas Valan, M.D., San Francisco, CA

Margriet Ellen van Achterberg, M.D., Washington, DC  
Laura Marie Van Dusen, M.D., Glen Ellyn, IL  
David Brian Van Holla, M.D., Iron Mountain, MI  
Jon Alan Van Loon, M.D., Rochester, MN  
Nicolaas John Van Nieuwenhuysen, M.D., Tustin, CA  
Ilva Elizabeth Van Valkenburgh, M.D., Mequon, WI  
Susan Carole Vaughan, M.D., New York, NY  
Luis Vazquez, M.D., Milwaukee, WI  
Corina M. Velehorsi, M.D., Windsor, ON  
Priya Venkatesh, M.D., Los Altos, CA  
Sonya Marie Vieira, M.D., New York, NY  
Anthony Joseph Villani, M.D., Rochester, NY  
Gilbert Jose Villela, M.D., Oakland, CA  
Ejaz Shareef Virk, M.D., Germantown, TN  
Gina Genoveffa Vitiello, M.D., Randolph, MA  
Katalin Vladar, M.D., Bethesda, MD  
Umar Wadood, M.D., Prairie Village, KS  
Marc David Waldman, M.D., Cross River, NY  
Susan S. Walker, M.D., Boston, MA  
Brandon James Wall, M.D., Little Rock, AR  
Christopher Lesle Wallace, M.D., San Antonio, TX  
Elizabeth Anne Walter, M.D., Molt, MT  
Ngozi Justina Wamuo, M.D., Plymouth, MN  
Wei Wang, M.D., Englewood, NJ  
Rebecca Ann Ware, M.D., Columbus, OH  
Jeffrey Masahisa Watabe, M.D., Sandy, UT  
Evan Todd Weiden, M.D., Gilbert, AZ  
Tanya Weinberg, M.D., Northport, NY  
Gary Weinstein, M.D., Searingtown, NY  
Linda Welkovich, M.D., West Palm Beach, FL  
Eric Michael Wexler, M.D., Ph.D., Pacific Palisades, CA  
James J. Whalen, M.D., Lincoln, RI  
Neil Evans Whicker, M.D., Atlanta, GA  
Robert Lee White Jr., M.D., Jasper, IN  
Michelle Lee Widlitz, M.D., New York, NY  
Andrew Daniel Wilkerson, M.D., Florence, AL  
Adedapo Babatunde Williams, M.D., Oak Park, IL  
Kristi Skeel Williams, M.D., TOLEDO, OH  
Veronica Lynn Williams, M.D., Little Rock, AR  
Daniel James Willis, M.D., Williamsville, NY  
Marketa Michelle Wills, M.D., Houston, TX  
Shawn Louise Willson, M.D., Prairie Village, KS  
Zaw Win, M.D., Kankakee, IL  
Elizabeth Raphael Wolff, M.D., Brooklyn, NY  
Robert James Wolff, M.D., Saranac Lake, NY  
Ikwunga Wonodi, M.B.B.S., Columbia, MD  
Shaun Patrick Wood, M.D., Indianapolis, IN  
Timothy W. Woodard, M.D., Fort Collins, CO  
Richard Lowell Worth, M.D., Shrewsbury, NJ  
William Wu, M.D., New York, NY  
Xiaoyan Wu, M.D., Lewisville, TX

Anna Qin Xiao, M.D., San Marino, CA  
Lin Xu, M.D., Wichita, KS  
Steven Raymond Yale, M.D., Tampa, FL  
Anupama Dronavalli Yedla, M.D., Huntsville, AL  
Zinaida Yel, M.D., Brooklyn, NY  
Anna Yoo, M.D., Watertown, MA  
Gihyun Yoon, M.D., New Haven, CT  
Joel L. Young, M.D., Rochester Hills, MI  
John Joseph Young, M.D., Cornwall, VT  
Raymond Young, M.D., Decatur, GA  
Thomas Myong Yun, M.D., Lilburn, GA  
Jorge Antonio Zapatel, M.D., San Diego, CA  
Rogelio Soria Zaragoza, M.D., Gig Harbor, WA  
Patricia E. Zaror, M.D., Wilmette, IL  
Lisa Elaine Zbaraschuk, M.D., Seattle, WA  
David Zeman, M.D., Livingston, NJ  
Shumin Zhao, M.D., Okemos, MI  
Khursheed Zia, M.D., Kansas City, MO  
Stephanie Ann Zisook, M.D., Los Angeles, CA  
Jonathan Gabriel Zuess, M.D., Phoenix, AZ  
Ilene Sharon Zwirn, M.D., Hastings On Hudson, NY

**Announcing diplomates of the ABPN for: Certification in Psychiatry, Part II, awarded March 28, 2014**

Farha Zaman Abbasi, M.D., Okemos, MI  
Kurian Chiramel Abraham, M.D., Belmont, NC  
Shamsher Singh Ahluwalia, M.D., Cary, NC  
Shabeer Ahmed, M.D., Annandale, MN  
Mohammed Turab Ali, M.D., Lombard, IL  
Muhammad Masihuddin Ali, M.D., Wichita, KS  
Shaheda Ali, M.D., Clarkdale, AZ  
Jason Lee Andersen, D.O., Elk Ridge, UT  
Jahi Kashka Anderson, M.D., Irving, TX  
Sandra Cadiente Aquino, M.D., Carson, CA  
Roomana Sameer Arain, M.D., Ballwin, MO  
Bushra Aziz, M.D., Garland, TX  
Rajendra Dhar Badgaiyan, M.D., Amherst, NY  
Cheryl Ellen Baggeroer, M.D., Exeter, NH  
Ani Adrine Baghdassarian, M.D., Great Neck, NY  
Nadine Renee Baptiste, M.D., Sugar Land, TX  
Carolina Biernacki, M.D., New York, NY  
Ahmad Bilal, M.D., Pittsford, NY  
Gyorgy K Bodrog, M.D., Lexington, MA  
Ed Jose Borrego, M.D., El Paso, TX  
Monica L Broderick, M.D., Hempstead, NY  
Payton Gordon Brown, M.D., Granger, IN  
Shawn Patrick Brown, M.D., Waddy, KY  
Douglas Michael Burgess, M.D., Parkville, MO  
Mouvielle Enit Caro Gracia, M.D., West Palm Beach, FL  
Kirk Anthony Carruthers, M.D., Nashville, TN  
Rohit Mathur Chandra, M.D., Brookline, MA  
David Gudipati Chandran, M.D., Ellicott City, MD  
Raquel Choua, M.D., North Bergen, NJ  
Evangelos Christodoulou, M.D., Sparta, NJ  
Ian Nui Chun, M.D., Kamuela, HI  
John William Collins, M.D., Thomasville, GA  
Peter Leo Cuff, D.O., Pulaski, NY  
Robert Lawrence Czech, M.D., Woodbury, MN  
Sandra Denis, M.D., Bethlehem, PA  
David Purushottamdas Desai, M.D., Highland, CA  
Matthew Norris Doolittle, M.D., New York, NY  
Mark Allen Esche, M.D., Austin, TX  
Margarita Markovna Eydelman, M.D., Malden, MA  
Cynthia Theresa Fonder, M.D., Lebanon, PA  
Vamsi Krishna Garlapati, M.D., North Chicago, IL  
Nazem Ghobrial, M.D., Rancho Cucamonga, CA  
Luisa Sobeyda Gonzalez, M.D., Bronx, NY  
Erik Dennis Goodwyn, M.D., Shepherdsville, KY  
Elisabeth Groome Gordon, M.D., New York, NY  
Sead Hadziahmetovic, M.D., Phoenix, AZ  
Noumana Hameed, M.D., Vestal, NY  
Mary H. Hanessian, M.D., Clayton, MO

Brian L. Harlan, M.D., Draper, UT  
Quamrul Hasan, M.D., Plainsboro, NJ  
Tamara Evans Hearst, M.D., Edmond, OK  
Audrey Verniece Hill, M.D., Grand Blanc, MI  
Dayna D. Hughes, M.D., Fayetteville, AR  
Amir Ali Ashiq Ali Hussaini, M.D., Knoxville, TN  
Ajaz Iqbal, M.D., Fort Wayne, IN  
Ajay Jalwan, M.D., Albertson, NY  
Karl Jeffries, M.D., Amherst, MA  
Ana Maria Brigida C. Junia, M.D., Sacramento, CA  
Tabassum Kahkashan, M.D., Northville, MI  
Ryosuke Kawatsuji, M.D., Grantham, NH  
Jonathan Kerr, D.O., Brookville, PA  
Ali Aijaz Khan, M.D., Plano, TX  
Mohammad Sarfaraz Ali Khan, M.D., McKinney, TX  
Laurie Blair Kile, M.D., Harrisburg, PA  
M Robin Larkin, M.D., Louisville, KY  
Arkady Levitan, M.D., Brooklyn, NY  
Marc Stuart Libman, M.D., Rochester, NY  
Howard Jung Shuo Lin, M.D., Tucson, AZ  
Matthew Lowe, D.O., Hilliard, OH  
Dale Eugene Marko, M.D., Charleston, SC  
Edward J. Maxwell, M.D., Piedmont, CA  
Tatiana Menick, M.D., Falls Church, VA  
Shaheena Minhas, M.D., Irving, TX  
Danielle Marie Mire, M.D., New Albany, IN  
Rukhsana Wajahat Mirza, M.D., Mount Pleasant, SC  
Mitali Sathi Mitra, M.D., Tucson, AZ  
Ali Saleh Mobaideen, M.D., Forest, VA  
Habibah Emelyn Mosley, D.O., Chester Springs, PA  
Georgian Tiberiu Mustata, M.D., Cazenovia, NY  
Pubudini Savithri Muthukuda, M.D., Gaithersburg, MD  
Elva Vehbiu Naco, M.D., Brooklyn, NY  
Inayath Fathima Nayeemuddin, M.D., Sugar Land, TX  
Muhammad Aslam Naz, M.D., South Ozone Park, NY  
Richard Allen New, M.D., Ammon, ID  
Shana-Xuanlan Chau Nguyen, M.D., Huntington Beach, CA  
Robert Cyrus Norwich, M.D., Corvallis, OR  
Wally Nobleza Novero, M.D., Hermitage, PA  
Ayobola Adekunle Oloworaran, M.D., Baxter, KY  
Anne Grace Stephanie N. Pascual, M.D., Monterey, CA  
Jasmine Patel, M.D., Yardley, PA  
Shaili K. Patel, M.D., Paradise Valley, AZ  
Sachin Shamkant Phansalkar, M.D., Sharon, MA  
Cynthia Allena Pilgrim, M.D., Cushing, OK  
Michael Pratts, M.D., Syracuse, NY  
Michael Welles Propper, M.D., Nashville, TN  
Donald Joseph Purcell II, M.D., Napa, CA  
Melissa DeJesus Quinn, M.D., San Antonio, TX  
Dilip Rajesh, M.D., Santa Fe, NM  
Amit Rathi, M.D., Glastonbury, CT

Clare Rene, M.D., Davis, CA  
Mya Sabai, M.D., Cincinnati, OH  
Ashwini Vinod Sabnis, M.D., Westport, CT  
Adamu Salisu, M.D., Charlotte, NC  
Nazish Sarfraz, M.D., Irving, TX  
Margaret Seide, M.D., New York, NY  
Srijan Sen, M.D., Ph.D., Ann Arbor, MI  
Tuzeen Shakir, M.D., Staten Island, NY  
Kellye Nichol Singletary, M.D., Louisville, KY  
Andrew Brewster Smith, M.D., Dayton, OH  
Pavan Somusetty, M.D., Wilsonville, OR  
Nesibe Oya Soysal, M.D., Santa Cruz, CA  
Kenneth Gregory Stephens, M.D., Shreveport, LA  
Steven Gregory Sugden, M.D., Roseville, CA  
Sajida Zubi Suleman, M.D., Louisville, KY  
Michael Warren Tsappis, M.D., Beverly, MA  
Victor M. Vazquez-Moreno, M.D., Toa Alta, PR  
Vasu Venkatachalam, M.D., Midlothian, VA  
Erika Phillis Wartena, M.D., Cambria, CA  
Laura Elizabeth White, M.D., Philadelphia, PA  
Gregory James Williams, M.D., New Braunfels, TX  
Shankar Basava Yalamanchili, M.D., Montgomery, AL  
Robert Sun Yew Young, M.D., Honolulu, HI



**Announcing diplomates of the ABPN for: Maintenance of Certification in the subspecialty of  
Child and Adolescent Psychiatry awarded April 21, 2014**

Maria Maria Anleu, M.D., South Beloit, IL  
Srilata Anne, M.D., Tuscaloosa, AL  
Suzanne Louis Aoun, M.D., Mounds View, MN  
Jonathan Eric Aronowitz, M.D., New York, NY  
Elisa Perette Bell, M.D., Chicago, IL  
Bryan John Bergh, M.D., Minneapolis, MN  
Karin Elizabeth Borgmann-Winter, M.D., Conshohocken, PA  
Mark Christopher Brown, M.D., M.P.H., El Paso, TX  
Shiraz Mahmud Butt, M.D., Oak Brook, IL  
Katherine B. Canfield, M.D., Santa Fe, NM  
Vivien Chan, M.D., Irvine, CA  
Nicole Danforth, M.D., Chestnut Hill, MA  
Kamal-Neil Singh Dass, D.O., Solon, OH  
John J. DiLallo, M.D., Dobbs Ferry, NY  
Zana Dobroshi, M.D., Ph.D., New York, NY  
Elizabeth Therese Dolgos, M.D., Pensacola, FL  
Steven Eugene Domon, M.D., Little Rock, AR  
Robert Lloyd Doyle, M.D., M.A., D.D.S., Boston, MA  
Philip L. Farley, M.D., J.D., Sugar Land, TX  
Lisa Roxanne Fortuna, M.D., M.P.H., Melrose, MA  
Bellelizabeth Foster, M.D., Albuquerque, NM  
Lance C. Foster, M.D., Fayetteville, AR  
Mark James Friedman, M.D., Glenview, IL  
Paul Jack Fulton, D.O., Barrington, RI  
Dolores Garcia-Moreno, M.D., New York, NY  
Mary-Margaret Gleason, M.D., New Orleans, LA  
John-Paul Gomez, M.D., Bethlehem, PA  
Lauri Theresa Green, M.D., North Prairie, WI  
A F M Z. Haque, M.D., Plainsboro, NJ  
Teresa Elizabeth Hermida, M.D., Manchester, ME  
James Michael Hetznecker, M.D., Havertown, PA  
Jeannie Ching-I Hu, M.D., Renton, WA  
Michelle Phillips Hubner, M.D., Tulsa, OK  
Anna Ivanenko, M.D., Kenilworth, IL  
Fredesvinda Jacobs-Alvarez, M.D., Orlando, FL  
Dexter Anthony Jensen, M.D., San Diego, CA  
Davinder P. Kakar, M.D., West Bloomfield, MI  
Sheryl Harumi Kataoka Endo, M.D., Los Angeles, CA  
Carol Luise Kessler, M.D., Ossining, NY  
Khadija Tawwab Khan, M.D., Oakbrook Terrace, IL  
Joseph Anthony Kithas, M.D., Las Vegas, NV  
Richard T. Kotomori Jr., M.D., Riverside, CA  
Gianluca La Monaca, M.D., Shepherdstown, WV  
Jacqueline Lebel, M.D., J.D., Tiverton, RI  
Richard Joonkoo Lee, M.D., Riverside, CA  
Carlos Guillermo Lopez, M.D., APO, AE  
Gary Marshall Mart, M.D., Chicago, IL

Maria Bernadette Mathias, M.D., Centerville, OH  
Paul Arthur Mattox, M.D., Durango, CO  
Fortunata Grace Milano, M.D., Medina, MN  
Richard Julian Nunes, M.D., Livermore, CA  
Murat Pakyurek, M.D., Roseville, CA  
Hector Jorge Parada, M.D., Chevy Chase, MD  
Ranna I. Parekh, M.D., Arlington, VA  
Alpa Ashok Patel, M.D., Northridge, CA  
Joyce Z. Pere, M.D., Greenwich, CT  
George L. Petzinger, M.D., Selah, WA  
Joseph Nicholas Pierri, M.D., Wexford, PA  
Clinton Conell Price, M.D., Seguin, TX  
Roxana Gabriela Raicu, M.D., Santa Fe, NM  
Maria Francesca Rodowski, M.D., Baltimore, MD  
Muhammad Wasim Sajid, M.D., Louisville, KY  
Elaine Ann Sandler, M.D., Evergreen, CO  
Giorgio Sant'Ambrogio, M.D., Boerne, TX  
Khawaja Shahzad, M.D., Ann Arbor, MI  
Ashima Sharma, M.D., Calabasas, CA  
Ioana M. Naumescu Shirley, M.D., Mountain Brk, AL  
Salman Siddiqui, M.D., Midlothian, VA  
Sarabjit Singh, M.D., Old Tappan, NJ  
Brian Daniel Smith, M.D., East Lansing, MI  
Philip Scott Smith, M.D., Washington, DC  
Ivy Ellen Sohn, M.D., Sudbury, MA  
Shella Rose Marie Solis, M.D., Dix Hills, NY  
Imran Trimzi, M.D., Wilmington, DE  
Margriet Ellen van Achterberg, M.D., Washington, DC  
Ingrid Vasiliu-Feltes, M.D., Miami, FL  
Wendi Michelle Waits, M.D., Alexandria, VA  
Marta Karolina Wasiak, M.D., Alachua, FL  
Karl Norman Zeff, M.D., Sacramento, CA  
Shoujie Zhang, M.D., Fresno, CA

**Announcing diplomates of the ABPN for: Maintenance of Certification in the subspecialty of  
Child and Adolescent Psychiatry awarded July 1, 2014**

Vishwas Jagdish Mashalkar, M.D., Sylvania, OH

**Announcing diplomates of the ABPN for: Maintenance of Certification in Psychiatry awarded  
July 1, 2014**

Benjamin Adyson Adewale, M.D., Alexandria, VA  
Maria-Victoria Agarin, M.D., Mineola, NY  
Trina Sue Cormack, M.D., Laredo, TX  
Mary Allison Felton, M.D., Columbia, MO  
Sofia Grewal, M.D., Saint Louis, MO  
L'Tanya Alicia Haith, M.D., Arnold, MD  
Victor Hong, M.D., Temple Terrace, FL  
Laja Idowu Ibraheem, M.D., Long Beach, CA  
Andrew Benjamin Johnson, M.D., Frederick, MD  
Kennard C. Kobrin, M.D., Fall River, MA  
Jayantilal Ramdas Patel, M.D., Lawrenceville, NJ  
Alberto A. Penalver, M.D., Coral Gables, FL  
Linda Mercado Peterson, M.D., Okemos, MI  
Gary Alan Roberson, M.D., whitfield, MS  
Clifton Antonio Smith, D.O., M.S., Saint Louis, MO  
Gisele Smith, M.D., Bear, DE  
Robert John Stine, M.D., Yorktown Heights, NY  
Daniel Tiang-Leng Tan, M.D., Houston, TX  
David Berman Walker, M.D., Bellevue, NE

**Announcing diplomates of the ABPN for: Certification in the subspecialty of Child and Adolescent Psychiatry awarded September 15, 2014**

Marilena Achim, M.D., Hudson, OH  
Otema Alice Adade, M.D., Upper Marlboro, MD  
Benjamin Andrew Adler, M.D., Corvallis, OR  
Ashley Jade Albarado, M.D., Baton Rouge, LA  
Shahzad Ali, M.D., Chapel Hill, NC  
Manish Aligeti, M.D., Lubbock, TX  
Mark Robert Allen, M.D., Merivale, Christchurch, S Island  
Nicole Modesto Almeida, M.D., Atlanta, GA  
Tahani Abdu Alqassem, M.D., Arlington, VA  
Ashish Anand, M.D., Mahwah, NJ  
Alexis Aplasca, M.D., Glen Allen, VA  
Anjela K. Arbogast, M.D., Christiansburg, VA  
Gurvinder Singh Arora, M.D., Mishawaka, IN  
Rania Attia, M.D., West Long Branch, NJ  
Janki Modi Avari, M.D., White Plains, NY  
Simran Singh Bagga, D.O., Glen Head, NY  
Rafiya A Baig, M.D., Townsend, DE  
Doriana Michiko Bailey, M.D., San Bruno, CA  
Arjun Bansal, M.D., Seattle, WA  
Argelinda Baroni, M.D., Brooklyn, NY  
Pravesh Basnet, MD, Springfield, IL  
Lisa Ann Batson, M.D., Middletown, NY  
Nicholas Eugene Batson, M.D., Middletown, NY  
Melissa Marie Batt, M.D., Denver, CO  
Smitha Battula, MBBS, M.D., Albany, GA  
Raman Baweja, M.D., Hummelstown, PA  
Rachel Anne Bennett, M.D., Merchantville, NJ  
Rebecca Dawn Berghorst, M.D., Chandler, AZ  
Nita S. Bhatia, D.O., Wappingers Falls, NY  
Shabnamzehra Pyarali Bhojani, M.D., Forest Hills, NY  
Drew Bianchi, M.D., New York, NY  
Hassan Ayaz Bokhari, M.D., Rockville, MD  
Brady Bradshaw, M.D., Cedar Rapids, IA  
Kjersti Anne Braunstein, M.D., Seattle, WA  
Claire Molly Brickell, M.D., Somerville, MA  
Michael Alan Brooks, D.O., J.D., Pittsburgh, PA  
Crystal Rose Bullard, M.D., Charlotte, NC  
Matthew David Burkey, M.D., Baltimore, MD  
Adam Sanford Burstein, D.O., Denver, CO  
Jennifer Cabrera, M.D., New York, NY  
Sabrina Mabel Caceres, D.O., Jacksonville, FL  
Kristin Lynn Canterbury, M.D., Hurricane, WV  
Kristen Lynn Carlo-Francisco, D.O., East Brunswick, NJ  
Michael Thomas Carpenter, M.D., Saint Cloud, MN  
Beau Alfonse Carubia, M.D., Denver, CO  
Shannon Caspersen, M.D., New York, NY

Tara Chandrasekhar, M.D., Durham, NC  
Shin Bey Chang, M.D., Baltimore, MD  
Jatinder Mohan Chawla, M.D., Kew Gardens, NY  
Christopher Chee, D.O., San Antonio, TX  
Shannon Marie Cheek, M.D., Columbus, OH  
Jeffrey Chen, M.D., San Jose, CA  
Kathryn Grace Cheney, M.D., New York, NY  
Peilin Alice Cheng, M.D., Arcadia, CA  
Steve Soman Chennankara, M.D., Temple, TX  
Damien Francis Chiodo, M.D., Wharton, NJ  
Tanishia DeSha Choice, M.D., Cambridge, MA  
Geneice Alanna Christian, M.D., Mountain View, CA  
Jessica Marie Cici, M.D., Minneapolis, MN  
Peter Joseph Clark, D.O., North Brunswick, NJ  
Sharonda Nicole Clark, M.D., Humble, TX  
Lisa Clement, M.D., Madison, WI  
John Coates, M.D., Hoffman Estates, IL  
Sara Marie Coffey, D.O., Tulsa, OK  
Mia Gintoft Cohen, M.D., White Plains, NY  
Adam Allan Coles, M.D., Denver, CO  
Jacquelyn Marie Collura, M.D., Pittsburgh, PA  
Erin Elizabeth Cordero, M.D., Glastonbury, CT  
German Enrique Corso Mendoza, M.D., McAllen, TX  
Caitlin Rose Costello, M.D., San Francisco, CA  
Joseph Crozier, M.D., Durham, NC  
Alex Cutler, M.D., Astoria, NY  
Julie Cyriac, M.D., New Hyde Park, NY  
Stephanie Marie Daly, M.D., Longmeadow, MA  
Kristin Little Dawson, M.D., Lexington, KY  
Anthony James Dedousis, M.D., Brooklyn, NY  
Jean Michelle Del Valle, M.D., Tampa, FL  
Shannon Lynne Delaney, M.D., New York, NY  
Erin Rose Dillon-Naftolin, M.D., Seattle, WA  
Kelly Wyatt Dion, M.D., Columbia, SC  
Nikita Noel Dixon, M.D., San Diego, CA  
Karen Sue Dobias, D.O., Ypsilanti, MI  
Beili Dong, M.D., MPH, Carmel, IN  
Julia Dorfman, M.D., Potomac, MD  
Anish Ranjan Dube, M.D., Santa Barbara, CA  
Zhanna Elberg, M.D., Amherst, NY  
Amanda Courtney Elliott, D.O., Walford, IA  
Stephen Carroll Elliott, M.D., Dallas, TX  
Ahmed Z Elmaadawi, M.D., Granger, IN  
Michael Tzvi Epstein, M.D., Pasadena, CA  
Christopher Erickson, M.D., Minneapolis, MN  
Saeed Eshraghi, M.D., Anaheim, CA  
Neevon Carl Esmaili, M.D., Los Angeles, CA  
Mia Everett, M.D., New York, NY  
Yasmeen Sayeed Fareeduddin, D.O., Arlington, VA  
Karen Adams Finch, M.D., San Francisco, CA  
Jennifer Erin Montgomery Fischer, M.D., Howard, WI

Carl Adam Fleisher, M.D., Belmont, MA  
Anthony Jacob Forgey, D.O., Flagstaff, AZ  
Christopher Fraser Fritzsche, M.D., Wilmington, NC  
Amy Beth Funkenstein, M.D., Providence, RI  
Sumana Gadde, M.D., Parkersburg, WV  
Milind Satish Gadgil, M.D., Denver, CO  
Bhavinkumar B Gajera, M.D., Paramus, NJ  
Alissa Renee Rescigno Garcia, M.D., Richmond Hill, GA  
Nidhi Garg, M.D., Hummelstown, PA  
Gabriel Rudolph Garza, M.D., Austin, TX  
Caroline C Geelan, D.O., New York, NY  
Bethany Maria Geib-Rosch, M.D., Durham, NC  
George Chengalathu Gettys, M.D., Lincolnwood, IL  
Janak Harendra Ghelani, M.D., Gardendale, AL  
Tresha Ann Gibbs, M.D., Bronx, NY  
Nicole Marie Gibler, M.D., Cincinnati, OH  
Soudabeh Givrad, M.D., Burlingame, CA  
Nicole Eid Gloff, M.D., Catonsville, MD  
Jeanne S Goodman, M.D., Brooklyn, NY  
Tina L Goodson, M.D., Fayetteville, AR  
Kimberly Gordon, M.D., New Orleans, LA  
Nicole Renee Graham, M.D., Cleveland, OH  
Laurie Beth Gray, M.D., Lincoln, MA  
Patrick Casey Gresham, M.D., Livonia, MI  
Sergiu Grozavu, M.D., San Diego, CA  
Elizabeth Carlton Grueneberger, M.D., Mount Pleasant, SC  
Carissa Bauer Gunderson, M.D., Iowa City, IA  
Elizabeth Nguyen Gutierrez, M.D., West Sacramento, CA  
Aida Hadziahmetovic, M.D., Phoenix, AZ  
Danella Marie Hafeman, M.D., Pittsburgh, PA  
Bahar Hashemi, M.D., Mountain View, CA  
Tamara Sonia Helfer, M.D., Boise, ID  
Ryan Michael Helm, M.D., Little Rock, AR  
Stacey Restrepo Helps, DO, Virginia Beach, VA  
Meghann Hennelly, M.D., Chicago, IL  
Lucas Shawn Henry, M.D., New Haven, CT  
Sara Blythe Heron, M.D., Oakland, CA  
Hwa Soo Hoang, M.D., Tenafly, NJ  
Pamela Edie Hoffman, M.D., Orange, CT  
Jennifer Elizabeth Holton, M.D., Atlanta, GA  
Ellen Margaret House, M.D., Nashville, TN  
Roya Ijadi-Maghsoodi, M.D., Los Angeles, CA  
Ijeoma Olachi Ijeaku, M.D., Beaumont, CA  
Subodh Jain, M. D., Springfield, MO  
Julie Overboe Jarvis, D.O., Fargo, ND  
Weerasinghege B.S. Jayasekara, M.B.B.S., Hewlett, NY  
Shamala Jeevarakshagan, M.D., Saint Paul, MN  
Jessica Jeffrey, M.D., Los Angeles, CA  
Kristina R Jiner, M.D., Blacklick, OH  
Sylvia Budd Johnson, M.D., Round Rock, TX  
Alicia Grattan Jorgenson, M.D., Bellevue, WA

Yukyung Jung, M.D., Oakland Gardens, NY  
Merima-Misirca Jurici, M.D., New Bedford, MA  
Robert P. Kallinicos, M.D., De Witt, NY  
Neha Kansara, M.D., M.B.B.S, Metairie, LA  
Cassie Daye Karlsson, M.D., Carmel, IN  
Martha Arwen Karlstad, M.D., Viroqua, WI  
Sophia Kassem, D.O., New Albany, OH  
Archana Kathpal, M.D., Watertown, NY  
Aaron J. Kauer, M.D., Iowa City, IA  
Michael Brian Kelly, M.D., Sacramento, CA  
Sean Patrick Kerrigan, M.D., Boston, MA  
Afshan Anjum Khan, M.D., Austin, TX  
Zishan Khan, M.D., Plano, TX  
Manpreet Khemka, M.D, Hattiesburg, MS  
Anna Ilinichna Khijniak, M.D., Irvine, CA  
Vininder Singh Khunkhun, M.D., Pittsburgh, PA  
Sapandeep Khurana, M.D., Las Vegas, NV  
Jared Kiddoe, M.D., Tallahassee, FL  
Devin Kim, M.D., Tucson, AZ  
Esther Kim, M.D., New York, NY  
Eugene Kimn, M.D., Los Angeles, CA  
Angela SY King, M.D., Honolulu, HI  
Adam Khuu Klapperich, D.O., Arden Hills, MN  
Jennifer Lynn Koch, M.D., Lexington, MA  
Sophia Kuo, M.D., Astoria, OR  
Mari Kurahashi, M.D., Brooklyn, NY  
Woo-Jin Kwak, D.O., Decatur, GA  
Stephanie I Wei Kwok, M.D., Houston, TX  
O'Nisha Shanette Lawrence, M.D., Philadelphia, PA  
Clara Lee, M.D., Milpitas, CA  
Ronald Hung Wei Lee, M.D., San Francisco, CA  
Dayna Jenay LePlatte-Ogini, M.D., Ann Arbor, MI  
Teresa Lim, M.D., Toronto, ON  
Muruga Anand Loganathan, M.D., Jeannette, PA  
Amy Christine Lowe, M.D., Baltimore, MD  
Gabriel E Lugo Rodriguez, M.D., Lakewood Ranch, FL  
Sarah M. Lytle, M.D., Cleveland, OH  
Nayyara Malik, M.D., Weatogue, CT  
Preetinder Kaur Mand, M.D., Redlands, CA  
Akeem Nassor Marsh, M.D., New York, NY  
Andrew Christopher Martin, D.O., Kihei, HI  
Elliott Burton Martin Jr., M.D., West Roxbury, MA  
Lady Aura Martinez Fernandez, M.D., San Antonio, TX  
Elizabeth Jo Mason, M.D., Columbia, SC  
Sasha Massachi, M.D., Rochester, NY  
Tushita Mayanil, M.D., Annapolis, MD  
Amy Marie Mayhew, M.D., Belmont, MA  
Jory Lynn Mazzola, M.D., Albuquerque, NM  
Anne McBride, M.D., Sacramento, CA  
Lynn Marie McCormick, M.D., Norwich, VT  
Alicia Dawn McGill, M.D., New York, NY



Elizabeth Clare McGuire, M.D., Los Angeles, CA  
Amy Meadows, M.D., Lexington, KY  
Anil Meesala, M.D., Bear, DE  
Elena Metcalf, M.D., Duluth, MN  
Rachel Lee Metheny, M.D., Miami, FL  
David Robert Meyer, D.O., Staunton, VA  
Dale Katherine Miller, M.D., Jacksonville Beach, FL  
Jennifer Melissa Milone, M.D., Jupiter, FL  
Gaurav Mishra, M.D., El Centro, CA  
Patrick Molitor, M.D., Dearing, GA  
Megan Marie Mroczkowski, M.D., New York, NY  
Melissa Muniz, M.D., Pittsburgh, PA  
Myo Thwin Myint, M.D., New Orleans, LA  
Herman Aronov Naftel, M.D., Chapel Hill, NC  
Meredith Zoe Naidorf, M.D., New York, NY  
Armin K. Nassiri, M.D., Cupertino, CA  
Michelle Odette Nazario-Malave, M.D., Houston, TX  
Courtney Diane Nixon, M.D., Oklahoma City, OK  
Abigail Babin Nodler, M.D., Boston, MA  
Demian Forest Obregon, M.D., Tampa, FL  
Kristine Urban Olivier Dr., M.D., Lafayette, LA  
Kenan Osmanovic, M.D., Somerset, NJ  
Hy Gia Young Park, M.D., Denver, CO  
Roey Pasternak, M.D., New York, NY  
Prem Nath Pathak, M.D., Bismarck, ND  
Panchajanya Paul, M.D., Indialantic, FL  
Juan D Pedraza, M.D., New York, NY  
Scott Robert Pekarul, M.D., Ypsilanti, MI  
Gregory Jonathan Postal, M.D., Bay Harbor Islands, FL  
Imraan A. Qureshi, M.D., McKinney, TX  
Mariam Rahmani, M.D., Gainesville, FL  
Dhanvendran Ramar, M.D., Watertown, NY  
Melissa Anne Ramirez, M.D., Scottsdale, AZ  
Ricardo Ramirez, M.D., Monterey Park, CA  
Lysette E. Ramos, M.D., Reading, PA  
Andres Alberto Ramos Henriquez, M.D., West Hartford, CT  
Kristin Lynn Remke Clary, D.O., Columbia, SC  
Stephen Carlos Remolina, M.D., Tucson, AZ  
Annette Reynolds, M.D., Lexington, KY  
Sandy H Rhee, D.O., North Aurora, IL  
Monique Vieira Ribeiro, M.D., Brookline, MA  
Hector Luis Rivera Reyes, M.D., Mayaguez, PR  
Aiyana Rivera-Rodriguez, M.D., White Plains, NY  
Maria Pia Rogines Velo, M.D., West Newton, MA  
Magdalena Romanowicz, M.D., Bedford, NH  
Marialba Romero Medina, M.D., San Juan, PR  
Melissa H Rooney, M.D., New York, NY  
Donna June Roybal, M.D., San Antonio, TX  
John C Rudersdorf, M.D., Saint Louis, MO  
Iustinian Rusu, M.D., Farmington, NY  
Abdolreza Saadabadi, M.D., Bakersfield, CA

Diana Patricia Sabagh Sabagh, M.D., Waterbury, CT  
Muskinni Salau, M.D., Columbia, MO  
Chase Baldwin Samsel, M.D., Pawtucket, RI  
Sajjad Raza Sarwar, M.D., Macomb, IL  
Shane William Savage, M.D., Newnan, GA  
Craig A Schiltz, M.D., San Francisco, CA  
Kelly Schofield, M.D., Chapel Hill, NC  
Sarah Morgan Schrauben, M.D., Portland, OR  
Jennifer Olson Schumann, M.D., Eugene, OR  
Manan Shah, M.D., Prince Frederick, MD  
Shaneel Shailesh Shah, M.B.B.S., Lyndhurst, NJ  
Tarik Shaheen, M.D., Charlottesville, VA  
Wael Shamseddeen, M.D., Farmington Hills, MI  
Aikiesha Nicole Shelby, M.D., Longwood, FL  
Mardoche Sidor, M.D., Astoria, NY  
Deepan Singh, M.D., Arverne, NY  
Bridget Mechele Smith, M.D., Brookhaven, MS  
Monique Dase Smith, M.D., North Pole, AK  
Tim Smith, M.D., International Falls, MN  
Christopher Edward Snowdy, M.D., Burbank, CA  
Dimple Sodhi, M.B.B.S., Melville, NY  
Jasdeep Kaur Sohi, M.D., Mentor, OH  
Jennifer Beth Sokol, D.O., Blue Bell, PA  
Jason Edward Spivey, M.D., Euclid, OH  
Justin Kuhns Spooner, M.D., Jacksonville, FL  
Amanda Square, M.D., New Haven, CT  
Kishore Kumar Sriram, M.D., Fort Wayne, IN  
Jessica Ann Stewart, M.D., Brooklyn, NY  
Samantha Andrien Stewart, M.D., Venice, CA  
Rene Jovanie Stokes, M.D., MPH, Laurel, MD  
Laura Allison Stone, M.D., Irving, TX  
Griffin Alexander Stout, M.D., Columbus, OH  
Jenee Gibson Stubbs, M.D., Humble, TX  
Chad Michael Sylvester, M.D., Saint Louis, MO  
Michael Huan Tang, M.D., Waban, MA  
Patrick Conan Tapia, M.D., Birmingham, AL  
Marianne W Tateosian, D.O., Mineola, NY  
Emily Tejani, M.D., Fair Oaks, CA  
Grace Thammasuvimol, M.D., Elkridge, MD  
Reena Thomas, M.D., Rahway, NJ  
Crystal Gaynelle Thomas-Rozea, M.D., Twinsburg, OH  
Alexander Mueller Timchak, M.D., Oak Park, IL  
Mandana Torabi, M.D., New York, NY  
Nitin Toteja, M.D., Brooklyn, NY  
Lorriann Tran, M.D., Baltimore, MD  
Christian Joseph Trentacosta, M.D., Staten Island, NY  
Reena Dilip Trivedi, M.D., Pleasanton, CA  
Elizabeth Ugochi Ucheoma-Cofield, M.D., Rowlett, TX  
Mai Uchida, M.D., Cambridge, MA  
Daniel Jay Uderitz, M.D., Johns Island, SC  
Monique Upton, M.D., Apopka, FL

Michael Martin Urda, M.D., Carrboro, NC  
Jennifer Lee Vande Voort, M.D., Rochester, MN  
Michelle K. Vanden Noven, M.D., Shorewood, WI  
Tamara Vanderwal, M.D., Branford, CT  
Elizabeth Ann Vannucci, M.D., Germantown, TN  
Shikha Verma, M.D., Gurnee, IL  
Carolina Vidal, M.D., Baltimore, MD  
Marina Ghayathrie Vijayakanthan, M.D., Winchester, MA  
Rekha Vijayan, M.D., Watertown, NY  
Amelia Kharman Villagomez, M.D., Tucson, AZ  
John Michael Vraciu, DO, North Canton, OH  
Paula Marie Wadell, M.D., Sacramento, CA  
Sasha Danchig Waring, M.D., Oakland, CA  
Elizabeth Sarah Wassenaar, M.D., Cincinnati, OH  
Jadon Ray Webb, M.D., Highlands Ranch, CO  
Brooke Ellyce Weingarden, D.O., Orchard Lake, MI  
Susan Weinstein, M.D., Ardsley, NY  
Nicole Cherie Welsh, M.D., Reno, NV  
Richard Thomas Weyler, M.D., Ivyland, PA  
Kerry Elise Wilkins, M.D., Northborough, MA  
Annie Noelle Williams, D.O., Macomb, MI  
Emily Van Leeuwen Williams, M.D., Marco Island, FL  
Kerry-Ann Lorraine Williams, M.D., Cambridge, MA  
Lawrence David Willison IV, M.D., PhD, Los Angeles, CA  
Katherine McHugh Winner, M.D., Dayton, OH  
Benjamin Wiseman, M.D., Charlottesville, VA  
Justyna Sylwia Wojas, M.D., Saint Petersburg, FL  
Matthew Arnot Wright, M.D. Ph.D., New York, NY  
Marika Inga Wrzosek, M.D., Peoria, IL  
Qun Wu, M.D., Chicago, IL  
Amy Wysocki, M.D., Dubois, PA  
Tou Cher Yang, M.D., Plymouth, MN  
William Yu, D.O., Brooklyn, NY  
Kashmeer Zablan, M.D., West Hartford, CT  
Connie Lynn Zajicek, M.D., Friendswood, TX  
Maria Carolina Zerrate Parra, M.D., New York, NY  
Ashley Zucker, M.D., Upland, CA

**Announcing diplomates of the ABPN for: Certification in Psychiatry awarded September 15, 2014**

Muhammad Ali Abbas, M.D., Howell, NJ  
Saleha Abbas, M.D., Lower Gwynedd, PA  
Kafia Hafeez Abbasi, M.D., Boise, ID  
Chadi Abdallah, M.D., Fairfield, CT  
Nancy Ramzy Abdelmalak, M.D., Elk Grove, CA  
Sara Abdijadid, D.O., Bakersfield, CA  
Olga A. Abduakhadov, M.D., Brooklyn, NY  
Harmony Raylen Abejuela, M.D., Watertown, MA  
Nesrin Karim Abu Ata, M.D., North Sioux City, SD  
Sahar Salem Abzakh, M.D., Wayne, NJ  
Alejandro L Acevedo Hernandez, M.D., San Juan, PR  
Sabeena Acharya, M.D., Clovis, CA  
Alexandra Levine Ackerman, M.D., New York, NY  
Marra Gillian Ackerman, M.D., New York, NY  
Graig Alan Aders, M.D., Georgetown, TX  
Sanjay Gautam Adhia, M.D., Sugar Land, TX  
Augustine Osondu Adiboshi, M.D., Fort lauderdale, FL  
Pranayjit V Adsule, M.B.B.S., Washington, DC  
Tushar Murli Advani, M.D., Chicago, IL  
Noman Afzal, M.D., Rensselaer, NY  
Pratibha Agarwal, M.D., East Meadow, NY  
Radha Gayatri Agepati, M.D., Alexandria, VA  
Manish Sahai Aggarwal, M.D., Elk Grove, CA  
Francisco Rafael Agrait-Taboas, M.D., Boston, MA  
Adnan Ahmed, M.B.B.S, Prior Lake, MN  
Bashir Ahmed, M.D., Springfield, MO  
Fazal Ahmed, M.D., Lombard, IL  
Mohammed Muzammil Ahmed, M.D., San Diego, CA  
Mohsin Saeed Ahmed, M.D., New York, NY  
Zaheer Uddin Ahmed, M.D., Clovis, CA  
Kyung Heup Ahn, M.D., Westport, CT  
Amir Ahuja, M.D., Little Silver, NJ  
Meesha Ahuja, M.D., Providence, RI  
Sailaja V Akella, D.O., Fishkill, NY  
Marlene Ann Marie Aking, M.D., Elk Grove, CA  
Hilary Akpudo, M.B.B.S., Spring, TX  
Sam Al-Saadi, M.D., M.S., Harrisburg, PA  
Marie Rose Joseph Alam, M.D., Chevy Chase, MD  
Laura Albert, M.D., Denver, CO  
Rajendra Aldis, M.D., Jamaica Plain, MA  
Cara Jae Alexander, M.D., Kirkland, WA  
Elizabeth DeVillers Alfson, M.D., Wakefield, MA  
Ammar Hassan Ali, M.D., Marshall, MN  
Fahad Ali, M.D., Bryn Mawr, PA  
Jermaine A. Ali, M.D., Louisville, KY  
Muneer Ali, D.O., Buffalo, NY  
Osama Ali, M.D., Lexington, KY  
Zahra Tina Ali Mohammad, M.D., Lewisville, TX  
Daniel Gregory Allen, M.D., Hill AFB, UT

Melissa Kay Allen, D.O., Missouri City, TX  
Stephen Clare Allison, M.D., Sausalito, CA  
Tamara Danielle Almeyda, M.D., Wakefield, MA  
Marieliz Veronica Alonso Calderon, M.D., New York, NY  
Abdullah S. S. S. Alozairi, M.D., Toronto, ON  
Gara Alsaadi, M.D., Woodbury, MN  
Murat Ibrahim Altinay, M.D., Cleveland, OH  
Franco Alvarez III, M.D., Rosamond, CA  
Francisco Jose Amador Miranda, M.D., San Juan, PR  
Autumn Ambroday, D.O., Excelsior, MN  
Kiyomi Elyse Ameriks, D.O., South Pasadena, CA  
Veronica Amey, M.D., Salina, KS  
Rohul Amin, M.D., Silver Spring, MD  
Shweta Amin, M.D., Norwalk, CT  
Claire Elizabeth Andersen, M.D., San Diego, CA  
Ashleigh Brooke Anderson, D.O., Bethlehem, PA  
Marissa Lea Andres-Kim, M.D., Encino, CA  
Kelly Sue Andrzejczyk-Beatty, D.O., McAlester, OK  
Maximus Nwakalunna Anitube, M.D., McKinney, TX  
Mohammad Imran Anjum, M.D., Milwaukee, WI  
Adeel Ansari, M.B.B.S., San Antonio, TX  
Gabriel Juan Aranovich, M.D., San Francisco, CA  
Anthony Archer, D.O., Portland, OR  
Armen Clyde Arevian, M.D., Santa Monica, CA  
Miklos Argyelan, M.D., Glen Oaks, NY  
Straight Line Arla, M.D., San Antonio, TX  
Lacey Armstrong, M.D., Bismarck, ND  
Eric Arnold, M.D., Oakland, CA  
Zoe Aurora Sarnat Aron, M.D., Los Angeles, CA  
Hansel Llaniel Arroyo Llantín, M.D., New York, NY  
Charles Ralph Arthur III, M.D., Baltimore, MD  
Misty Dawn Ary, M.D., Birmingham, AL  
Michael Sam Ascher, M.D., Philadelphia, PA  
Fady Ashamalla, M.B.Ch.B., Orlando, FL  
Hany Shawky Fayez Ashamalla, MD, MSc., Glendale, AZ  
Jessica Lefebvre Aslam, M.D., Jamesville, NY  
Yuval Asner, M.D., Owings Mills, MD  
Abraham Akram Assad, M.D., Coralville, IA  
Mostafa Sehameldin Assadalla Sherazy, M.D., Scottsdale, AZ  
Clarisa Virginia Atencio, M.D., New York, NY  
David Matthew Atkinson, M.D., Eagan, MN  
Jasmine Atwal, M.D., Sacramento, CA  
Ramiz Audi, M.D., Norfolk, VA  
Rozy Aurora, M.D., Valhalla, NY  
Andrei Avenido, M.D., Antioch, TN  
Carla Isabel Aviles-Lee, M.D., San Francisco, CA  
Olayinka Modupe Ayeni, M.D., The Woodlands, TX  
Gayle Yvonne Ayers, D.O., Levelland, TX  
Tanya Azarani, M.D., Brooklyn, NY  
Jessica Azoff, D.O., Bourbonnais, IL  
Shaweta Babbar, M.B.B.S., Milford, CT

Funda S. Bachini, M.D., Tempe, AZ  
Lucas Paul Bachmann, M.D., Woodbury, MN  
Suman Kumar Reddy Baddam, M.D., New Haven, CT  
Hasani Kigos Baharanyi, M.D., Atlanta, GA  
Mirza Baig, M.D., Minneapolis, MN  
Kala Bailey, M.D., Coppell, TX  
Priyadarshan Bajpayi, M.D., Bellmore, NY  
Alia Ramos Bajwa, M.D., Philadelphia, PA  
Kathryn Baker, M.D., Ann Arbor, MI  
Matthew James Baker, D.O., Kettering, OH  
John M Balaicuis, M.D., Philadelphia, PA  
Sabish Balan, M.D., New York, NY  
Charleen Ruth Balcer Rowekamp, D.O., Esko, MN  
David Thomas Baldes, M.D., Duluth, MN  
Chandrika Balgobin, D.O., Fairfax, VA  
Gary Matthew Balian, M.D., Pontiac, MI  
Dalia Balsamo, M.D., New Haven, CT  
David Joshua Banayan, M.D., Chicago, IL  
Vijayta Geeta Bansal, M.D., Highland Park, IL  
Sharmistha Barai, M.D., Albuquerque, NM  
Jonathan Joseph Barker, M.D., Portland, OR  
Melanie Barrett, M.D., Bryan, TX  
Jonathan Barton, M.D., Philadelphia, PA  
Dieter K. Bartschat, M.D., Chapin, SC  
Subhash Bashyal, M.D., Saint Louis, MO  
Jeremy S. Bass, M.D., Birmingham, AL  
Ria Antoinette Battaglino, M.D., Apex, NC  
Anthony Battista, M.D., SOMERVILLE, MA  
Priyanka Baweja, M.D., Brooklyn, NY  
Kelly Davis Baylan, M.D., Temple, TX  
Kathleen Tappen Baynes, M.D., Rochester, NY  
Joshua Arneas Bazell, M.D., New York, NY  
Josue Fernando Becerra, M.D., Columbus, GA  
Gayane Begoyan, M.D., Glendale, CA  
Ashley Erin Belcher, D.O., BLUE SPRINGS, MO  
Helen Masresha Bellete, M.D., M.P.H., Jessup, MD  
Alfredo Bellon Velasco, M.D., Ph.D., Hummelstown, PA  
Irina Vladi Benaur, M.D., Princeton, NJ  
Stephanie Beneski-Barlow, D.O., Brighton, NY  
Yusra Benhalim, M.D., Irving, TX  
Talya R. Benoff, M.D., Providence, RI  
Timothy Gerard Benson, M.D., Watertown, MA  
Anna Fay Berg, M.D., Milwaukee, WI  
Afton Patricia Bergel, M.D., Rocky Point, NY  
Raviv Brian Berlin, M.D., New York, NY  
Kyle Alan Bernheim, M.D., Woodland Hills, CA  
Wil C Berry, M.D., Salem, OR  
Cristiane Stefani Bertuol, M.D., La Jolla, CA  
Luis Emilio Betancourt, M.D., Waxhaw, NC  
Atit Bhattachan, M.B.B.S., Pittsburgh, PA  
Nadeem Bhatti, M.D., Irving, TX

Emilie Bhe, M.D., Sacramento, CA  
Zoe R. L. Billinkoff, M.D., Providence, RI  
Christina Yvette Bilyeu, M.D., Vacaville, CA  
Tracy Lynn Binius, M.D., Oak Park, IL  
Kawal Bir, M.D., Houston, TX  
Dianna Bisek, M.D., Rochester, MN  
Jhilam Biswas, M.D., Needham Heights, MA  
Eric Richard Black, M.D., Springfield, IL  
Taylor McCallum Black, M.D., Seattle, WA  
Zoe Blacksin, M.D., New York, NY  
Leigh Fylstra Blalock, M.D., Durham, NC  
Michael Sinclair Blue, M.D., New Orleans, LA  
Michael Adams Bolton, M.D., Laguna Niguel, CA  
Yara Angelica Bonet Pagan, M.D., Barceloneta, PR  
Karen Bos, M.D., San Mateo, CA  
Michael Lewis Boucher, M.D., Los Angeles, CA  
Jessica Boudreaux, D.O., Broussard, LA  
Sarah A. Bougary, M.B.B.S., Pittsburgh, PA  
Lee Michael Bourgeois, M.D., Lewisville, NC  
Amy Evelyn Bourne, M.D., Middleton, WI  
Eric Neil-Jensen Boyum, M.D., Oskaloosa, IA  
Buck Braden, D.O., Greensboro, NC  
Claire Alease Bradley, M.D., AMARILLO, TX  
Ricki-Leigh Laura Brampton, M.D., Corpus Christi, TX  
Andrea S Brandon, M.D., New York, NY  
Jennifer Moore Brandstetter, M.D., Brecksville, OH  
Kimberly Brandt, D.O., Columbia, MO  
Harsimran Brar, M.D., New Hyde Park, NY  
Raminder Kaur Brar, M.D., South Bend, IN  
Sukhjit Brar, M.D., Clovis, CA  
Emily L Bray, D.O., Newburyport, MA  
Courtney Marionette Brewer, M.D., Richmond, VA  
Christina Ann Brezing, M.D., New York, NY  
Donna Cheryl Brister, D.O., Parkville, MO  
Daniel Bristow, M.D., Lake Oswego, OR  
Shyvonne Nashelle Brooke, M.D., New York, NY  
Carson Brown, M.D., San Francisco, CA  
Elizabeth N Brown, D.O., Phoenix, AZ  
Henry Brown, D.O., Phoenix, AZ  
Jeremy Anthony Brown, M.D., Bolingbrook, IL  
Matthew A Brown, D.O., Chicago, IL  
Nicolas Brown, M.D., Portland, OR  
Chevelle Sabrina Hadassah Brudey, M.D., Dallas, TX  
Michael John Brus, M.D., New York, NY  
Sharilee Bryant, M.D., Loma Linda, CA  
Ricardo David Budjak, M.D., Santa Rosa, CA  
Melissa Park Bui, M.D., Boston, MA  
Irena Bukelis, M.D., Vestavia, AL  
Peter Michael Bulow, M.D., New York, NY  
Alicia Burbano, M.D., Albuquerque, NM  
John McClure Burger, M.D., San Diego, CA

Johanna Burke, M.D., Belmont, MA  
Julia Denise Burrow, M.D., Perrysburg, OH  
Ankur Ajit Butala, M.D., New York, NY  
Ahmar Butt, M.B.B.S., Wyandanch, NY  
Tayyba Buttar, M.D., Winston Salem, NC  
Mayra Cristina Cabrera, M.D., New York, NY  
Baruch Rael Cahn, M.D., Ph.D., Los Angeles, CA  
Mary Rosa Buckler Cairns, M.D., Austin, MN  
Jacqueline Calderone, M.D., Denver, CO  
David Call, M.D., Washington, DC  
Bryce Callister, D.O., Colorado Springs, CO  
Andrene Alicia Campbell, M.D., Mount Vernon, NY  
Kendra Campbell, M.D., New York, NY  
Lindsay Jo Campbell, M.D., Charleston, SC  
Nedson Campbell, M.D., New Haven, CT  
Ulas Mehmet Camsari, M.D., BLACKSHEAR, GA  
Kelly Schwartzenburg Cannon, M.D., Baton Rouge, LA  
Erin Capone, M.D., New Orleans, LA  
Rachel Anne Caravella, M.D., New York, NY  
Jessica Malena Carbajal Sarmiento, M.D., Little Rock, AR  
Alonso Cardenas, M.D., Valencia, CA  
Damira Caric-Sicenica, M.D., Ph.D., Pittsburgh, PA  
Stacey Brandt Carloni, M.D., Hooksett, NH  
Erik Sean Carlson, M.D., Seattle, WA  
Tamar Chaya Carmel, M.D., Pittsburgh, PA  
Regina Maria Carney, M.D., Miami Beach, FL  
Brent Randall Carr, M.D., New Orleans, LA  
Amanda Nicole Carrera-Alvarez, M.D., New York, NY  
Traci Reed Carroll, M.D., Johnson City, TN  
Chelsea Mary Carson, M.D., Evans, GA  
Carlos Arturo Carvajal, M.D., New York, NY  
Carmen Elizabeth Casasnovas, M.D., New York, NY  
Robin Casey, M.D., Chapel Hill, NC  
Lauren Cashion, M.D., Annapolis, MD  
Kristi Linnet Cassleman, D.O., Fpo, AP  
Sara R Catania, D.O., Springfield, MO  
Jordan Gregory Cates, M.D., Burlington, IA  
Kyle R Cedermark, M.D., Minneapolis, MN  
Binu Chacko, M.D., Jericho, NY  
Anuradha C. Challa, M.D., Lansing, MI  
Indira Devi Challa, M.D., Murfreesboro, TN  
Srikanth Challagundla, M.D., Charleston, WV  
Andrew Chambers, M.D., Glen Allen, VA  
Danielle Chammas, M.D., San Francisco, CA  
Beverly Anne Chang, M.D., Roseville, CA  
Niraj Chapla, M.D., Salisbury, MD  
Nicole Charder, M.D., New York, NY  
Nadia Elizabeth Charguia, M.D., Chapel Hill, NC  
Cynthia Ann Chavira, M.D., Los Angeles, CA  
Gomathie Chelvayohan, M.D., Ann Arbor, MI  
Albert Chen, M.D., Camarillo, CA



Jasper James Chen, M.D., Cheyenne, WY  
Juliana Chen, M.D., Newton, MA  
Michael S Chen, M.D., East Brunswick, NJ  
Stephanie Yu-Hsuan Chen, M.D., Jamaica Plain, MA  
Victor Chen, MD, Gilroy, CA  
Marsha Alexis Chenoweth, M.D., Bellevue, WA  
Megan Chiarelli, M.D., Seattle, WA  
Vidyashree Darasaguppe Chikkaramanjegowda, M.D., Jamestown, ND  
Tammy Angela Chin, M.D., San Francisco, CA  
Siu Ping Chin Feman, M.D., Cambridge, MA  
Joel Patrick Chisholm, M.D., Weaverville, NC  
Shivani Verma Chmura, M.D., San Carlos, CA  
Rebecca Eunjoo Cho, M.D., Hoffman Estates, IL  
Steven Choi, D.O., Columbia, SC  
Jake Harley Choiniere, D.O., Seattle, WA  
Vandana Chopra, M.D., San Fernando, CA  
Asifa Choudhry, M.D., Irmo, SC  
Virginie-Anne Chouinard, M.D., Belmont, MA  
Nagib Chowdhury, M.D., Springfield, MO  
Michael Louis Christie, M.D., Rochester, NY  
Li Chu, M.D., TORONTO, ON  
Madison Chu, M.D., Greenwood Village, CO  
Meriam B Chua, M.D., Dover, DE  
Amara Chudhary, M.D., Anderson, SC  
Shaun Cory Chung, M.D., Orange, CA  
Michael Churchwell, M.D., Evanston, IL  
Michal Carlyle Cieraszyński, D.O., Vinton, VA  
Stephanie Lee Cincotta, M.D., Newton, MA  
Alejandra Clark, M.D., Upland, CA  
Frank Alexander Clark, M.D., Radford, VA  
Heather Clark, M.D., Clemmons, NC  
Kristen Clark, M.D., East Windsor, NJ  
Sara Clark, M.D., Seattle, WA  
Rebecca Clendenin, M.D., San Francisco, CA  
Kelly Lynn Coffman, M.D., Atlanta, GA  
Hope I Cohen Webb, D.O., Rochester, MN  
Emily Seifert Collins, M.D., Alpharetta, GA  
Jeannie Collins, M.D., Fayetteville, NC  
Michael David Combs, M.D., Brooklyn, NY  
Mariana Compagnone, M.D., Cardiff By The Sea, CA  
Laura Jane Conley-Olsen, M.D., Greenbrier, AR  
Jesse Contovasilis, M.D., Old Bethpage, NY  
Megan P Coons, M.D., New York, NY  
Nelson E. Cordero Torres, M.D., Miami, FL  
Maria Isabel Cordova Gonzalez, M.D., Mayaguez, PR  
Raul Gustavo Corredor Gutierrez, M.D., Miami, FL  
Carolina Maria Covarrubias, M.D., Marina del Rey, CA  
Nicholas Crall, D.O., Charlottesville, VA  
Jennifer Creedon, M.D., New Orleans, LA  
Tracy Leigh Crews, M.D., Buckeye, AZ  
Ronald Salamat Cristobal, M.D., Austin, TX

Megan Crochet, M.D., New Orleans, LA  
Amanda Jane Crosier, M.D., Albany, NY  
Andrea Crowell, M.D., Atlanta, GA  
Cesar Cruz, M.D., San Gabriel, CA  
Natasha Cunningham, M.D., Durham, NC  
Jason Curry, D.O., Tucson, AZ  
Sidiki Dabo, M.D., New York, NY  
David Abolarin Dada, M.D., Ocala, FL  
Mohammed Hasan Daher, M.D., Stockton, CA  
Danielle Nguyen Dahle, M.D., Cambridge, MA  
Allison Dailey, M.D., Chillicothe, OH  
Rachel Jane Dalthorp, M.D., Oklahoma City, OK  
Kathleen Daly, M.D., Pueblo, CO  
Ahmed M. Damtew, M.D., Dalton, GA  
Kristine Rasmussen Dangremond, M.D., Pueblo, CO  
Scott David Daniels, M.D., Provo, UT  
Srinivas Dannaram, M.B.B.S., Omaha, NE  
Tracy Das, M.D., Johns Creek, GA  
Mihai D. Dascalu, M.D., Watkins Glen, NY  
Jawad Daud, M.D., Miami, FL  
JOHN DAULA, M.D., Fort Wainwright, AK  
Allison Kolkhorst Davidson, D.O., Needham, MA  
Kelly Jo Davidson, M.D., Mentor, OH  
Deborah C Davis, M.D., Greer, SC  
Valerie Rae Davis, M.D., Costa Mesa, CA  
Marcus De Carvalho, M.D., Ponte Vedra Beach, FL  
Daniel Peter De Cecchis, M.D., Chesapeake, VA  
Danilynn Gonzales De Claro, M.D., Floral Park, NY  
Nilsa De Jesus Rosario, M.D., Tampa, FL  
Kelley Jane De Leeuw, M.D., Imperial Beach, CA  
Inge Alexandra De Weille, M.D., Webster, NY  
Breehan Summer Dean, M.D., St Petersburg, FL  
Almeria Anne Decker, M.D., Cincinnati, OH  
Leslie Ann Deckter, M.D., Cincinnati, OH  
Alex Deem, M.D., Tampa, FL  
Jonathan Villas Dela Luna, M.D., Providence, RI  
Daniel Delgado, M.D., Panama City, FL  
Leticia Delgado, M.D., Miami, FL  
Matthew DeLiere, M.D., Broomfield, CO  
Dustin DeMoss, D.O., Fort Worth, TX  
Robert Edward Dempsey, D.O., Mattawan, MI  
Sandeep Denduluri, M.D., Bellaire, TX  
Xiaolin Deng, M.D., Ph.D., Aberdeen, SD  
Nora Marion Wilson Dennis, M.D., Hillsborough, NC  
Danica Chandra Denton, D.O., Phoenix, AZ  
Michael DePalma, D.O., Tucson, AZ  
Emily J Deringer, M.D., Brooklyn, NY  
Priyanka Mukund Deshmukh, M.D., Long Beach, CA  
David DeVellis, M.D., Chelsea, MI  
Eric Devon, M.D., Philadelphia, PA  
William Frederick DeWolf, M.D., Wexford, PA

Nikhil Dhawan, M.D., Dexter, MI  
Namita Dhiman, M.D., Lynchburg, VA  
Sheetal Pramod Dhoke, M.D., Lima, OH  
Girishkumar V. Dhorajia, M.D., Bloomington, IL  
Utpal Dhruve, M.D., Chicago, IL  
Shanna Diaz, D.O., Albuquerque, NM  
Raquel Joselyn Diaz Guerrero, M.D., Columbia, MO  
Patricia Jean Dickmann, M.D., Saint Paul, MN  
Marie DiDario, D.O., Brick, NJ  
Viriana Del C. Diez Gutierrez, M.D., San Juan, PR  
Michael DiGiacomo, M.D., Williamsville, NY  
Lydia Christine DiTirro, D.O., Lakeport, CA  
Linda Do, D.O., Torrance, CA  
Matthew Dean Dobbertin, D.O., Omaha, NE  
Carmen Dobrescu, M.D., Gurnee, IL  
Yuriy Dobry, M.D., San Francisco, CA  
Jennifer Dore, M.D., San Carlos, CA  
Nicole Marie Dorio, D.O., Stewartsville, NJ  
Wilder Thorne Doucette, M.D., Lebanon, NH  
Heather Downhour, M.D., Indianapolis, IN  
Carolyn Doyle, M.D., Oakland, CA  
Marley Doyle, M.D., Brighton, MA  
Vanessa Hope Doyle, M.D., Cincinnati, OH  
Albana Dreshaj, D.O., Cleveland, OH  
Taly Drimer-Kagan, M.D., Apex, NC  
Jerita Johanna Dubash, D.O., Christiansburg, VA  
Erick Ducut, M.D., Chicago, IL  
Stephen Christopher Dudley, M.D., Fayetteville, NC  
Caitlin A. Dufault, M.D., Clovis, NM  
Laurentiu Dumitrescu, M.D., Sausalito, CA  
Lance Russell Dunlop, M.D., Highland Park, NJ  
Walter Seton Dunn, M.D., Los Angeles, CA  
Dora Isabel Duque, M.D., Union City, NJ  
Rebecca Durkin, M.D., Chicago, IL  
Preeti Dusaj, M.B.B.S., Grand Island, NE  
Justin Matthew Dyniewski, M.D., Fort Worth, TX  
Erikka Daniene Dzirasa, M.D., M.P.H., Durham, NC  
Stacy Marie Eagle, M.D., New York, NY  
Chadd Kawika Eaglin, M.D., McAlester, OK  
Erika Beth Ebert, M.D., Sunapee, NH  
Linslee Marie Egan, M.D., Encino, CA  
John Egger, M.D., Chicago, IL  
James Michael Eicher, M.D., Wyoming, MI  
Nicholas Koeppen Eilbeck, M.D., South Euclid, OH  
Tiana Sati Ekhande, D.O., Dewitt, MI  
Rebecca Eleanya, M.D., MPH, Chambersburg, PA  
Bryan Ellerson, M.D., Miami Beach, FL  
Emily Cordelia Elliott, M.D., New York, NY  
Charli Sheena-Shaliss Ellis, D.O., Dallas, TX  
Tatyana Ellison, M.D., Long Beach, CA  
Richard Ellsasser, M.D., New York, NY

Daniel Ojonugwa Emina, M.D., San Francisco, CA  
Robert John Enriquez, M.D., San Diego, CA  
James Douglas Eplett Jr, M.D., Medfield, MA  
Chad Erickson, M.D., Park Rapids, MN  
Laura Erickson-Schroth, M.D., New York, NY  
Richard John Ernst, D.O., Bethesda, MD  
Kristin Valderas Escamilla, M.D., Austin, TX  
Evelyn Escobar, D.O., Bayonne, NJ  
Gary Sean Escola, M.D., New York, NY  
Stacey Espaillat, M.D., Bethlehem, PA  
Jose Francisco Espaillat Inchautegui, M.D., Newport News, VA  
Gilbert Esser, M.D., Albuquerque, NM  
Mervat Estefanos, M.D., Greenville, SC  
Mercedes German Estrella, M.D., Suffern, NY  
Nicholas Evangelidis, M.D., Manhattan, KS  
Colin Mark Evans, M.D., New Bern, NC  
Jamie Lorraine Evans, M.D., Roanoke Rapids, NC  
Faraaz Fakhri, M.D., Gainesville, FL  
Scott Benjamin Falkowitz, D.O., New York, NY  
Marianne Farag, D.O., Springfield, NJ  
Monica Faria, M.D., Los Angeles, CA  
Omar Farooqi, M.D., Chino, CA  
Bella Leah Fatakhof, M.D., Forest Hills, NY  
Kimberly Ann Fenzl, M.D., Chicago, IL  
Joel Fernandes, M.D., Gainesville, FL  
Dominick R. Fernandez, M.D., Hagatna, GU  
Francesco Alessandro Ferrari, M.D., New York, NY  
Noor Jarun Ferrell, D.O., Sugar Land, TX  
Adarezza I. Ferrer, M.D., La Jolla, CA  
Brian Blake Ferris, M.D., Lubbock, TX  
Carol Lynn Ferro, M.D., Pasadena, CA  
Patricia A. Fertig, D.O., Tappan, NY  
Christine Marie Fiechter, D.O., Mesa, AZ  
Bryan Gary Fillette, M.D., Houston, TX  
Sarah Fineberg, M.D., New Haven, CT  
Aikaterini Fineti, M.D., Worcester, MA  
Weston Scott Fisher, M.D., San Francisco, CA  
Reed Cromwell Flaschen, M.D., New York, NY  
Haskel Fleishaker, M.D., New York, NY  
Stephen Alford Fleming, M.D., Athens, GA  
Seth Adam Flesher, M.D., M.P.H., New York, NY  
Francisco Javier Fletes, M.D., Honolulu, HI  
Sarah Florence, M.D., Chicago, IL  
Dimy Fluyau, M.D., North Miami Beach, FL  
Joseph Flynn, M.D., Greenwich, CT  
Teresa Mary Foley, M.D., Rochester, MN  
Logan Gary Foltz, M.D., Salt Lake City, UT  
Louis Forouhar-Graff, M.D., West Hartford, CT  
Simmie Lorene Foster, M.D., Ph.D., Cambridge, MA  
Reginald Francis, M.D., Sunset, LA  
Candace Fraser, D.O., New Kensington, PA

David Freeman, M.D., Richmond, VA  
Izhak Fridman, M.D., Oceanside, CA  
Josef Froehlich, M.D., Lima, OH  
Ayme Veronica Frometa, M.D., Maywood, NJ  
Falyne Jessica Fry, M.D., Detroit, MI  
Liusong Jason Fu, M.D., Germantown, TN  
Amy Fuglei, M.D., Davis, CA  
Lance Robert Fuller, M.D., Clemmons, NC  
Michael James Fuller, M.D., Denver, CO  
Whitney Nicole Fulton, M.D., Huntington, WV  
Jonathan Funk, M.D., Atascadero, CA  
Mary Terese Gabriel, M.D., Washington, DC  
Amanda Beth Gabrielson, M.D., Minneapolis, MN  
Brian Gadbois, M.D., Tampa, FL  
Matthew M. Gaines, D.O., SLC, UT  
Princess Gloria Gaitawe-Johnson, M.D., Evansville, IN  
Alkesh Bhupendra Gajjar, M.D., Yorktown, VA  
Albert Gerard Galante, M.D., Wayne, NJ  
Gregory Mark Gale, M.D., New York, NY  
Miriam Galescu, M.D., Gaithersburg, MD  
Lenoy Galvez, M.D., Lodi, NJ  
Matthew Gambino, M.D., Chicago, IL  
Sevil Gamer, M.D., New York, NY  
William Bryce Gammeter, M.D., Sioux Falls, SD  
Babuji Reddy Gandra, MBBS, Duluth, MN  
Deepali Gangahar, M.D., Baltimore, MD  
Amanda Kristen Gangoo, M.D., Long Island City, NY  
Nader Ganim, M.D., Miami Beach, FL  
Enquan Gao, M.D., Saint Louis, MO  
Alicia Susana Garcete Guaps, M.D., Long Island City, NY  
Dianelys Garcia, M.D., Bergenfield, NJ  
Renee Michelle Garcia, M.D., Covina, CA  
Elena Francisca Garcia Aracena, M.D., Stamford, CT  
Kawish Garg, M.D., greencastle, PA  
Thaddeus Markham Garland, M.D., Mclean, VA  
Nicholas Garo, M.D., New York, NY  
Justin Paul Garrett, D.O., Liberty Lake, WA  
Matthew English Gaskins, M.D., Columbia, SC  
Jennifer Rose Gatchel, M.D., Boston, MA  
Marie Anne Gebara, M.D., Pittsburgh, PA  
Gibson George, M.B.B.S., Philadelphia, PA  
Erika Antoinette Gerz, M.D., New York, NY  
Richard Edward Gestring, M.D., Saint Charles, MO  
John D. Giannone, M.D., Quincy, MA  
Jesus Manuel Gil Gutierrez, M.D., Wesley Chapel, FL  
Scott Gilchrist, M.D., Morgantown, WV  
Akashdeep Gill, M.D., Los Angeles, CA  
Gurkiran Gill, M.B.B.S., Seminole, FL  
Jasleen Gill, M.B.B.S., Minneapolis, MN  
John Gillean, M.D., Denver, CO  
Stacey Lyn Gillespie, M.D., Lancaster, NH

Sarah Meagher Gillman, M.D., Baltimore, MD  
Fred Wetter Gioia, M.D., Dallas, TX  
Dan Giurca, M.D., Yonkers, NY  
Moataz Kamel Giurgius, M.D., La Mirada, CA  
Sean Glass, M.D., Boston, MA  
Ritu Goel, M.B.B.S., Severn, MD  
Melissa Goelitz, M.D., San Francisco, CA  
Rachel Goldberg, M.D., Vienna, VA  
Benjamin Goldstein, M.D., Wilsonville, OR  
Bahar Golestan, M.D., Phoenix, AZ  
Vivienne Alice Gomes, M.D., New Bedford, MA  
Mercy Mary Gonzalez, M.D., Miami Lakes, FL  
Merlita Ariany Gonzalez, M.D., San Antonio, TX  
Rafael A. Gonzalez Alonso, M.D., Guaynabo, PR  
Elena Gonzalez Ammatuna, M.D., Dallas, TX  
Alexis T Gonzalez Luquis, M.D., Carolina, PR  
Nereida Gonzalez-Berrios, M.D., Houston, TX  
Anthony Gotay, M.D., Denville, NJ  
Elaine Gould, D.O., Bridgeport, CT  
Hanady Abdulhady Gouta, M.B.B.S., Hamden, CT  
Bhaskar Yaduraya Gowda, M.D., Chesterfield, MO  
Shanthi Gowrinathan, M.D., Los Angeles, CA  
Rakesh Goyal, M.B.B.S., Hartford, CT  
Larissa Anne Grace, M.D., Rancho Cucamonga, CA  
Leona Jean Graham, M.D., Dothan, AL  
Steven R Graham, M.D., Pittsburgh, PA  
Nara Granja Ingram, M.D., Nashville, TN  
Bradley Grant, D.O., Charlottesville, VA  
Alexander Graypel, M.D., Saint Louis, MO  
Jennifer Greco, M.D., Metairie, LA  
Vanessa Rose Green, D.O., Belton, TX  
Erica Lisa Greenberg, M.D., Boston, MA  
Stacy Lynn Greeter, M.D., Portland, OR  
Severin Winter Grenoble, M.D., Daphne, AL  
Judith Grimmond, M.D., Tampa, FL  
Eugene Grudnikoff, M.D., Bayside, NY  
Lorena M. Grullon-Figueroa, M.D., New York, NY  
Beth Grunschel, M.D., Trumbull, CT  
Sandeep Gude, M.D., Orangeburg, SC  
Alma Guerra, M.D., Rochester, NY  
Maria Alvarado Guerrero, M.D., Leesburg, FL  
Gioia Mia Guerrieri, D.O., Bethesda, MD  
Manuel Andres Guillen, M.D., Santa Fe, NM  
Jeffrey Paul Guina, M.D., Beavercreek, OH  
Elizabeth Kwak Guinto, M.D., N Bethesda, MD  
Medhat Guirguis, M.B.Ch.B., Lubbock, TX  
Anisha Gulati, M.D., North Charleston, SC  
Elisa Gumm, D.O., Tucson, AZ  
Nishanie Gunawardane, D.O., Great Neck, NY  
Gregory J. Gunyan, D.O., Floral Park, NY  
Rahul Gupta, M.D., Atlanta, GA

Sandeep Gupta, M.D., Ottawa Hills, OH  
Sathyan Gurumurthy, M.D., New York, NY  
Bahar Hadjiesmaeiloo, M.D., Philadelphia, PA  
Colleen Hagemann, M.D., New Orleans, LA  
Crystal Hagood, M.D., Atlanta, GA  
Michael M Halassa, M.D., New York, NY  
James Haliburton, M.D., Victoria, TX  
Julia Halm, D.O., Perrysburg, OH  
Cliff Scott Hamilton, M.D., Westfield, NJ  
Robert Hamm, M.D., Paris, TN  
Christopher Hammond, M.D., New Haven, CT  
Lawrence Hao Han, M.D., Downingtown, PA  
Kamna Handa, M.B.B.S., Springfield, IL  
Lauren Hanna, M.D., Glen Oaks, NY  
Hillary Hanson, M.D., Sioux Falls, SD  
Liina Hanson, M.D., Melbourne Beach, FL  
Robin Elizabeth Hanson, D.O., Philadelphia, PA  
Fasiha Haq, M.D., Pearland, TX  
Ashlee Breanna Hardesty Van Ginkel, M.D., Salt Lake City, UT  
Katherine Harding, M.D., Shenorock, NY  
Bethany L Harper, M.D., Yellow Springs, OH  
David Eugene Harris, D.O., Palm Harbor, FL  
Jacob Harris, M.D., Boise, ID  
Miranda Rachelle Harris, M.D., Augusta, GA  
Helena Hart, M.D., Folsom, CA  
Jocelyn Ann Hart, M.D., Ann Arbor, MI  
Abigail Hartzler, M.D., Mill Valley, CA  
Habeeba Hashimi, M.D., Santa Clara, CA  
Robert Joseph Haskell, M.D., Los Angeles, CA  
Ahmed Nabeel M. Hassan, M.D., FRCPC, Toronto, ON  
Heather N Hauck, M.D., New Bern, NC  
James Matthew Haug, M.D., Denver, CO  
Joshua Haugh, D.O., Shrewsbury, MA  
David C Hauser, M.D., Baltimore, MD  
Molly Hawke, M.D., Gahanna, OH  
James Donald Hawthorne III, M.D., Lexington, KY  
Elizabeth Hay, M.D., La Porte, IN  
Fumitaka Hayashi, M.D., Saddle River, NJ  
Munya Hayek, M.D., Boston, MA  
Jason Hayes, D.O., Sahuarita, AZ  
John Kendall Hearn, M.D., Denver, CO  
Jared Charles Heathman, M.D., League City, TX  
Marc Aaron Heiser, M.D., Los Angeles, CA  
Gregory Helton, M.D., Durham, NC  
David Henderson, M.D., New Orleans, LA  
Gregory Shannon Henderson, M.D., Sneads Ferry, NC  
Carolyn Jean Gonter Hendricks, M.D., De Pere, WI  
Melissa Hendriks, M.D., Royal Oak, MI  
James Robert Henry, M.D., San Francisco, CA  
Agdel Jose Hernandez-Colon, M.D., Fort Lee, NJ  
Mariela D. Herrera, M.D., Bronx, NY

Mariela Herrera Rojas, M.D., Billings, MT  
Benjamin Lane Hersey, M.D., Apple Valley, MN  
Kristin Marie Hess, D.O., Nashville, TN  
Benjamin Hidy, M.D., Del Mar, CA  
Bruce Shawn Hill, M.D., Washington, DC  
Michelle M Hill, M.D., Waynesville, MO  
Shannon Lynne Hillier, D.O., MPH, Corpus Christi, TX  
Aisha Hines, D.O., Plano, TX  
Sarah Hodulik, M.D., New York, NY  
Hemalatha Holenarasipura Rajanna, M.B.B.S., Brookfield, WI  
Andrea Holinga, M.D., Colleyville, TX  
Yael Holoshitz, M.D., New York, NY  
Jamie A. Hom, M.D., Philadelphia, PA  
Rebecca Eve Hommer, M.D., Washington, DC  
Ji Su Hong, M.D., Creve Coeur, MO  
Larry Vernon Hook, M.D., Maple Grove, MN  
Bryan Hopping, D.O., BROOKLYN, NY  
Hooman Hormozian, M.D., Porter Ranch, CA  
Thomas Horn, D.O., Chesterfield, MO  
Elizabeth Ann Horstmann, M.D., Los Angeles, CA  
Daniel Hosta, M.D., Loveland, OH  
Marcus James Houston, M.D., Moraga, CA  
Jonathon Richard Howlett, M.D., San Diego, CA  
John Hsieh, M.D., Houston, TX  
Jian Hu, M.D., Miami Beach, FL  
Wei Hu, M.D., Mayfield Heights, OH  
Xiaohong Hu, M.D., Edmond, OK  
Victoria Huan, M.D., Astoria, NY  
Alice Xin Huang, M.D., San Francisco, CA  
Jacqueline Hubbard, M.D., St Pete Beach, FL  
Timberly Kay Humbert, M.D., Brookline, MA  
Kurt Derek Humphrey, M.D., Kaneohe, HI  
Peter Chu Chen Hung, M.D., Torrance, CA  
Amber Hunt, D.O., Indianapolis, IN  
Ted Bryan Hunter, M.D., Detroit, MI  
Adam Hunzeker, M.D., Pinehurst, NC  
Mohamed Mokhtar Hussien-Bakr, M.D., Palmdale, CA  
Cord David Huston, M.D., Shawnee, KS  
Amanda Katherine Bowles Hutchison, M.D., Denver, CO  
Lisa Brooks Hutchison, M.D., Durham, NC  
Eric Dirk Huttenbach, M.D., Worcester, MA  
Nga Thu Huynh, M.D., Memphis, TN  
Joshua Hvidding, M.D., Honolulu, HI  
Bryan Ray Hyler, M.D., San Marcos, CA  
Amer Ali Mukred Ibrahim, M.B.B.S., Fargo, ND  
Ihab Ibrahim, M.D., Brooklyn, NY  
Said Ali Ibrahimi, M.D., Tucson, CA  
Richard Idell, M.D., Tyler, TX  
Ajirioghene Igbide, M.D., Silver Spring, MD  
Koji Iizuka, M.D., Valdosta, GA  
Obinna Ogbonnaya Ikwechegh, M.D., Winston Salem, NC



Muhammad Imran, M.D., Kansas city, MO  
Joseph Insler, M.D., Westwood, MA  
Mfon Malachy Inyang, M.D., Leesburg, GA  
Mudassar Iqbal, M.B.B.S., New York, NY  
Navneet Iqbal, M.B.B.S., Palo Alto, CA  
Rizwan Iqbal, M.D., Middletown, CT  
Nikhath Irfana, M.B.B.S., Neenah, WI  
Joseph Waheb Iskandar, D.O., Troutville, VA  
Sadaf Islam, M.D., Clarence Center, NY  
Aviv Itzhaki, M.D., Hendrson, NV  
Allison Yuri Iwaoka-Scott, M.D., San Francisco, CA  
Ajani Dechaun Jackson, M.D., Folsom, CA  
Lynn Marie Jacobson, M.D., Lexington, KY  
Catline Jacques, M.D., Arlington, MA  
Robert Jaffe, M.D., New York, NY  
Shabana Mahmood Jaffri, M.D., Pensacola, FL  
Sonal Jagasia, M.D., Arlington, VA  
Miljen Jagodic, M.D., West Milwaukee, WI  
Jagan Mohan Rao Jakkula, M.B.B.S., Thief River Falls, MN  
Erika Katherine Jakobson, D.O., Bayville, NY  
Stephanie Ann Jallen, M.D., Bismarck, ND  
Jason James, M.D., Houston, TX  
Joan Elizabeth James, M.D., Iowa City, IA  
Tara-Willow Ferren James, M.D., Spokane, WA  
Imran Ahmed Jamil, M.D., Jersey City, NJ  
Shanti Jampani, M.B.B.S., Weston, FL  
Sonal Jandial, D.O., Pasadena, CA  
Agnieszka E Janicka, M.D., Providence, RI  
Delanie Jean Janke, M.D., Cincinnati, OH  
Shonda Renee Janke-Stedronsky, M.D., Georgetown, TX  
Cory Daniel Jaques, M.D., Los Angeles, CA  
Neil Jariwala, M.D., Vincennes, IN  
Suzanne Geier Jasberg, M.D., Minneapolis, MN  
Gagandeep Singh Jattana, M.D., Pittsford, NY  
Ajay Laxmandas Jeetwani, M.B.B.S., Springfield, IL  
Charles Wesley Jenson, M.D., Klamath Falls, OR  
Maurice Jeter, M.D., Fulton, MD  
Nirmala Reddy Jetty, M.D., Birmingham, AL  
Anik Jhonsa, M.D., Philadelphia, PA  
Bejoy John, M.D., Quincy, IL  
Amber Johnson, M.D., Wheat Ridge, CO  
Gia Elaine Johnson, M.D., Stone Mountain, GA  
Justin Michael Johnson, M.D., Chapel Hill, NC  
Robert Johnston, M.D., Sudbury, MA  
Mirjana Jojic, M.D., New York, NY  
Gwendolyn R Jones, M.D., Pinehurst, NC  
Heather Donielle Jones, M.D., Smyrna, GA  
Ian Matthew Jones, M.D., Los Angeles, CA  
Jessica Michelle Jones, M.D., Draper, UT  
Monique Jones, M.D., Beaverton, OR  
Ann Joseph, M.D., Highlands Ranch, CO

Makesha Ann Joyner, M.D., Silver Spring, MD  
Sarah Juul, M.D., Atlanta, GA  
Asiya Kabir, M.D., New Hyde Park, NY  
Saili Kalaskar, M.B.B.S., Hartford, CT  
Sean Nicolas Kaley, M.D., Charlottesville, VA  
Diana Lynn Kallis, M.D., Palm Springs, CA  
Mohammad Shahid Kamal, M.D., Greenwood, IN  
Samer Mahdi Kamal, M.D., Beaumont, CA  
Sanjeev Madhav Kamat, M.D., Saint Louis, MO  
Kurtis Sachio Kaminishi, M.D., Los Angeles, CA  
Madhavi Kandel, M.B.B.S., Charlottesville, VA  
Yoshio Arturo Kaneko, M.D., Boston, MA  
Xin Kang, M.D., Diamond Bar, CA  
Arun Kumar Kantamneni, M.D., Atlanta, GA  
Tulasi Kanukuntla, M.B.B.S., Thief River Falls, MN  
Larry Kaplan, D.O., Brookline, MA  
Troy Brandon Kapral, M.D., Snellville, GA  
Chris Anthony Karampahtsis, M.D., M.P.H., Watertown, MA  
Anwarul Karim, M.D., Jamesville, NY  
Arjun Girish Karkhanis, M.D., Austin, TX  
Bianca Cabrera Karris, M.D., Fpo, AP  
Michael Edward Kase, M.D., Bakersfield, CA  
Chandrakala Kathiravan, M.D., Wilmington, DE  
Elionora Katz, M.D., Hampton, VA  
Adam Kaufman, M.D., New York, NY  
Aarti Kaul, M.D., Cedar Park, TX  
Eva Kaul, M.D., Albuquerque, NM  
Gunit Kaur, M.D., Richmond, VA  
Harpreet Kaur, M.D., Baltimore, MD  
Inderjeet Kaur, M.D., Lenexa, KS  
Jasleen Kaur, M.B.B.S., East Meadow, NY  
Mandeep Kaur, M.B.B.S., Brooklyn, NY  
Rupinder Kaur, M.D., Elk Grove, CA  
Bobby Kaura, M.D., Redlands, CA  
Bhavna Kaushik, M.D., Greenville, NC  
Sailaja Kavuru, M.D., Roanoke, VA  
Aneela Kazi, M.D., Bethesda, MD  
Noor Ahmed Kazi, M.D., Chester, PA  
Iram Fatima Kazimi, M.D., Sugar Land, TX  
Niranjan KC, M.B.B.S., Elkhorn, NE  
Mary Elizabeth Kelleher, M.D., South Orange, NJ  
Lori Kels, M.D., Arlington, VA  
Rachna Mukesh Kenia, M.D., New York, NY  
Sowmya Kodali Kenia, M.D., Wilmington, DE  
Jeffrey Kerner, M.D., Bronx, NY  
Andrew Kerstein, D.O., Overland Park, KS  
Moiria Kathryn Kessler, M.D., Stanford, CA  
Georgia Lee Ketchum, M.D., Durham, NC  
Alex Sogomon Keuroghlian, M.D., Boston, MA  
Abdul Aleem Khan, M.D., Southgate, MI  
Ahmed Raza Khan, M.D., Stanford, CA

Erum Khan, M.D., Columbia, MO  
Mohd Aleem Khan, M.D., Danville, VA  
Shazia Khan, M.D., Middletown, DE  
Arash John Khatami, M.D., San Diego, CA  
Monika Aneja Khiani, M.D., Chicago, IL  
Miraslava E Khmurets, M.D., Alexandria, VA  
Walter James Kilpatrick, D.O., Brookline, MA  
David Kim, D.O., Anchorage, AK  
Fadalia Darlene Kim, M.D., Norman, OK  
Richard Mutembei Kinyamu, M.D., Brooklyn, NY  
Natasha Kiryankova-Dalseth, M.D., Philadelphia, PA  
Deborah Anne Kissinger, D.O., Kailua, HI  
Eunjie Klegar, M.D., Westport, CT  
Matthew Klein, D.O., Mesa, AZ  
Daniel Kline, M.D., Vinton, VA  
Cory Klippel, M.D., Tampa, FL  
Kathryn Ann Klunk, M.D., Bellevue, WA  
Peter Russell Knudsen, M.D., Sacramento, CA  
Aruna Devi Kodali, M.D., North Canton, OH  
Steven Edward Koehl Jr., D.O., Columbia, SC  
Aaron M Koenig, M.D., Brookline, MA  
Noam Yeshaya Koenigsberg, M.D., Hollywood, FL  
Carol Ann Koenigsberger, M.D., Ph.D., San Diego, CA  
Bradley Kohoutek, M.D., Fargo, ND  
Sharad Koirala, M.B.B.S., Richmond, VA  
Anne Kokayeff, M.D., Saint Paul, MN  
Tiwalola Olufunke Kolawole, M.D., Norwich, CT  
Srinivas Kolipaka, M.D., Cumming, GA  
Venkata Kolli, M.B.B.S., Omaha, NE  
Urszula Kopec, M.D., Woodside, NY  
Maria Thottungal Koshy, M.D., Elk Grove, CA  
Jenny Kosman, M.D., Sarasota, FL  
Antigone Demosthenous Kostas, M.D., Greenwich, CT  
Jay Kothari, M.D., Tucson, AZ  
Khyati Kothari, M.B.B.S., East Amherst, NY  
Supriya Sharma Kothavale, D.O., New York, NY  
Joanna Marie Koutros, M.D., University Heights, OH  
Elizabeth DeRose Kowal, M.D., Ada, MI  
Nicholas Kramer, M.D., Elkhart, IN  
Matthew D. Krasucki, M.D., Brookfield, WI  
Philip Krick, D.O., New York, NY  
Nithin Krishna, M.B.B.S., Clarksville, MD  
Priya Krishnasamy, M.D., Palisades, NY  
Kira Marie Krivy, D.O., Wexford, PA  
Joseph Lee Kugler, M.D., Austin, TX  
Sarah Suzanne Kuhn, M.D., Charleston, SC  
Rebecca Adia Kuhns, M.D., Durham, NC  
Alok Kumar, M.D., Chantilly, VA  
Mukesh Kumar, MBBS, Little Canada, MN  
Neeta Kumari, M.D., Temecula, CA  
Maya Kun, D.O., Brooklyn, NY

Diana Kurlyandchik, M.D., Brooklyn, NY  
Karole Kuslak, D.O., Wauwatosa, WI  
Mercedes Kristen Kwiatkowski, M.D., Redwood City, CA  
Steven Kwoh, M.D., Phoenix, AZ  
Hubert Labio, M.D., Burlington, IA  
Daniel Jonathan Lache, M.D., Morton, PA  
Darnell Ladson, D.O., Huber Heights, OH  
Joshua Lee LaGrant, M.D., Honolulu, HI  
Sheila Chitsaz Lahijani, M.D., Chicago, IL  
Maha Lahoud-Bladykas, M.D., Seminole, FL  
Mary K. Lajoy, M.D., Portland, OR  
Colin Barclay Lamb, M.D., Cape Elizabeth, ME  
Jason V Lambrese, M.D., Somerville, MA  
Khris S. Lampon Torres, M.D., Mayaguez, PR  
Qiuxia M. Lan, M.D., New Hyde Park, NY  
Jacqueline Landess, M.D., Denver, CO  
Jennifer Lynne Landucci, M.D., Dayton, OH  
Sara Michelle Lane, M.D., White Plains, NY  
Zachary Lane, M.D., Durham, NC  
Kerri Lia Entin Langer, M.D., Centennial, CO  
Kathryn Alexis Langham, M.D., San Diego, CA  
Alan Langlieb, M.D., Phoenix, MD  
Adrienne Alicia Langlinais, M.D., Charleston, SC  
Laura Marie LaPlante, M.D., Seattle, WA  
Aaron Edward Larson, M.D., Wadena, MN  
Nabi Ghulam Latif, M.D., Irvine, CA  
Simone Gabrielle Lauderdale, M.D., New York, NY  
Sarah Liesl Laughon, M.D., Chapel Hill, NC  
Allen Lavender, D.O., Fayetteville, GA  
Tamar Lavy, M.D., Astoria, NY  
Holly Beth Law, M.D., Crofton, MD  
Ryan Edward Lawrence, M.D., New York, NY  
Tonya Nicole Lawrence, M.D., Elkins Park, PA  
Dung-Nghi Ngo Le, M.D., Goleta, CA  
Hoa Thuan Le, D.O., Brooklyn, NY  
Sophia Giang Le, D.O., Orange, CA  
Jay Howard Leathers, M.D., Yorba Linda, CA  
Amy Lynn Ledgerwood, M.D., Penn Yan, NY  
Christina Yi-Shen Lee, M.D., Irving, TX  
Daniel James Lee, M.D., DeRidder, LA  
David Myung-Jin Lee, M.D., Cherry Hill, NJ  
Jae Seung Lee, D.O., Fullerton, CA  
Robert Lee, M.D., Nacogdoches, TX  
Soo Jung Lee, M.D., Hoffman Estates, IL  
Walter Korea Lee, M.D., Denver, CO  
Rupinder Kaur Legha, M.D., Brookline, MA  
Sari Lehrhoff, M.D., Springfield, NJ  
Evan Sean Leibu, M.D., New York, NY  
Olga Leibu, M.D., New York, NY  
John Leikauf, M.D., Menlo Park, CA  
Gary Lelonek, M.D., Bronx, NY

Chad Lennon, M.D., Laurel, MD  
Galina Novgorodsky Lensky, M.D., Philadelphia, PA  
Amber Faith Lerma, M.D., Moraga, CA  
Clark Costigan Lester, M.D., Corbin, KY  
Kimberly Ann Leventhal, M.D., Salem, MA  
Maria Levine, M.D., Granada Hills, CA  
Danielle Levy, M.D., New Orleans, LA  
Charles P Lewis, M.D., Rochester, MN  
Jun Li, M.D., New York, NY  
Kara Martin Lichtman, M.D., Brooklyn, NY  
John Lichtsinn, M.D., Minneapolis, MN  
Justin Liegmann, M.D., Bloomfield Hills, MI  
Biana Sarah Lifschitz, M.D., Cherry Hill, NJ  
Cindy Ann Lim, M.D., new york, NY  
Shengxi Lin, M.D., Marlboro, NJ  
Daniel Faver Linhares, M.D., New York, NY  
Norman Litchfield, M.D., Boise, ID  
Jason Shixie Liu, M.D., Fresh Meadows, NY  
Joseph Liu, M.D., Rancho Cucamonga, CA  
Dorothy Liu-Barbaro, M.D., Del Mar, CA  
Deirdre Lloyd, M.D., San Antonio, TX  
Kimberly C Lo, M.D., Los Angeles, CA  
George H. Loeffler, M.D., San Diego, CA  
Celeste Lopez, M.D., San Francisco, CA  
Claudia Isabel Lopez, M.D., San Juan, PR  
Danielle Kristen Lopez, M.D., Snellville, GA  
Lance A Lopez, M.D., Twentynine Palms, CA  
Jennifer D. Lorenz, M.D., North Las Vegas, NV  
Lynne Ann Love, M.D., Dallas, TX  
Jisha Lovin Kuriakose, M.B.B.S., Newhyde park, NY  
Ginger Lovingood, M.D., Maryville, TN  
Christopher Lowden, M.D., Chicago, IL  
Elaine I Lu, M.D., Cupertino, CA  
Aracelis Johanna Lu Brea, M.D., Bronx, NY  
Heidee Lund, M.D., Salt Lake City, UT  
Sean Xiao Luo, M.D., New York, NY  
Mechibelle Mabanta Lynch, M.D., Reno, NV  
Sonja Lynn, D.O., Minneapolis, MN  
Christina Pitts Lynn, M.D., Columbia, SC  
Zhendong Jeff Ma, M.D., Ph.D., Bellevue, WA  
Meredith Macgregor, M.D., New York, NY  
Patrick MacIver, M.D., Tampa, FL  
Joanna Vaz MacLean, M.D., Providence, RI  
Evan Zane Macosko, M.D., Boston, MA  
Alexandra Sarah Macy, M.D., Haverford, PA  
Praveen Reddy Madadi, M.D., M.P.H., Parker, TX  
Pavan Kundan Madan, M.D., Davis, CA  
Ragavan Mahadevan, M.D., Little Rock, AR  
Bryant Keith Mahaffey, M.D., Decatur, AL  
Aman Mahajan, M.B.B.S., Wauwatosa, WI  
Muhammad Hassan Majeed, M.B.B.S., Brooklyn, NY

Salman Majeed, M.B.B.S., Hummelstown, PA  
Heather Kimberly Mak, M.D., Katy, TX  
Tushar Jamnadas Makadia, M.B.B.S., Pittsburgh, PA  
Apurva Narendrakumar Makadiya, M.D., Laurel, MD  
Nasuh Malas, M.D., Ypsilanti, MI  
Tara Malekshahi, M.D., New York, NY  
Meghan Malhotra, M.D., Holtsville, NY  
Rathna S. Mallela, M.D., Stony Brook, NY  
Mohit Manandhar, M.D., Hartford, CT  
Hosain Manesh, M.D., Charleston, SC  
Ruby Mangsatabam, M.D., Edison, NJ  
Srinagesh Mannekote Thippaiah, M.B.B.S., New Hyde Park, NY  
Shiva Mansourkhani, M.D., El Paso, TX  
Michael Brian Mantz, M.D., Orange, CA  
Roma Manzoor, M.D., Overland Park, KS  
Natalie March, M.D., Kennesaw, GA  
Reetta Marja Marciano, M.D., Bluffton, SC  
Karen Theresia Marcus, M.D., Berkeley, CA  
Christopher Paul Marett, M.D., Cincinnati, OH  
Anthony Thomas Marfeo, M.D., Newton, MA  
Tatjana Maric, M.D., Grand Rapids, MI  
Kristi Ann Maroni, M.D., Hilliard, OH  
Ames Tadeo Marquez, M.D., El Paso, TX  
Laura Francesca Marrone, M.D., San Diego, CA  
Kevin Marsee, M.D., Redondo Beach, CA  
Robert Paul Marseille, M.D., Oak Park, IL  
Rebecca Marshall, M.D., Portland, OR  
Ashley Lynden Martin, M.D., Philadelphia, PA  
Clinton Martin, M.D., Hoover, AL  
Wendy M. Martin, M.D., Brookline, MA  
Cecile Marie-Rose Martineau, M.D., New York, NY  
Adolfo Martinez Castelo, M.D., Tucson, AZ  
Tania Consuelo Martinez-Jimenez, M.D., Allentown, PA  
Tobias Francis Marton, M.D., San Francisco, CA  
Raman Marwaha, M.B.B.S., Philadelphia, PA  
Brian Scott Maser, M.D., Orange, CA  
Sarah Masoodsinaki, M.D., New York, NY  
David Massey, M.D., Fayetteville, AR  
Christina Shamara Mather, M.D., San Francisco, CA  
Eva Marina Mathews, M.D., Baton Rouge, LA  
Alka Mathur, M.D., San Jose, CA  
Melissa Camille Matthews, M.D., Citrus Heights, CA  
Darrick May, M.D., Albuquerque, NM  
Geoffrey Joseph May, M.D., Dallas, TX  
Jacob Stephens Mays, D.O., Atlanta, TX  
Sara Mazaheri, M.D., Vienna, VA  
Alex McCormick, D.O., Beavercreek, OH  
Mary McCormick, M.D., Dublin, GA  
Michael Ralph McCormick, M.D., Greenwood Village, CO  
Raynia Letitia McGee, M.D., Elgin, SC  
Scott McIntosh, M.D., Pensacola, FL

Brandon Chad McKinney, M.D., Pittsburgh, PA  
Shalice Dionne McKnight, D.O., Alexandria, VA  
Laura McLafferty, M.D., Marlton, NJ  
David McMahan, D.O., Green Bay, WI  
Courtney Lockhart McMickens, M.D., New Haven, CT  
Talia Danielle McNamara, M.D., Savannah, GA  
Deana Jo McReynolds, M.D., Dayton, KY  
Stephan Meadors, M.D., Birmingham, AL  
Gavin Meany, M.D., Fargo, ND  
Abraham Blain Medaris, M.D., O Fallon, MO  
Daniel Medeiros Almeida, M.D., West Chester, OH  
Amit Mediratta, M.D., Brooklyn, NY  
Amishi Mehta, M.D., Chicago, IL  
Reema Mehta, M.D., New York, NY  
Melanie Melville Santos, M.D., Houston, TX  
Elizabeth Rachel Menefee, M.D., Barberton, OH  
Melissa Ann Merhege, M.D., Albuquerque, NM  
Jessica Veronica Merkel-Keller, M.D., Baltimore, MD  
Eric G. Meyer, M.D., Apo, AP  
Andrew J Mietz, M.D., Rochester, NY  
Peter Bishoy Mikhail, M.D., New Haven, CT  
Christine Louise Miller, D.O., West Hartford, CT  
Jeffrey D. Miller, M.D., Roslyn, NY  
Jennyffer Peralta Miller, M.D., Avon, CT  
Richard William Miller, M.D., East Greenwich, RI  
Samantha A Miller, M.D., Bronx, NY  
Jennifer Minami, M.D., New York, NY  
Joseph Thomas Mingoia, M.D., Melbourne, FL  
Hassan M. Minhas, M.B.B.S., Providence, RI  
Erica Louise Mitchell, M.D., Minneapolis, MN  
Paul Anthony Mitrani, M.D., East Setauket, NY  
Marissa Miyazaki, M.D., New York, NY  
Dhruv Modi, M.B.B.S., Ogdensburg, NY  
Jeffrey Craig Moffat Jr., M.D., Running Springs, CA  
Adebowale Mofikoya, M.D., Sun Prairie, WI  
Robin Jean Mogul, M.D., Shaker Heights, OH  
Adil Amaan Mohammed, M.D., Leesburg, FL  
Meerabai Mohapatra, M.D., Riverside, CA  
Ghouse Mohiuddin, M.D., D.O., Addison, IL  
Hammad Mohsin, M.B.B.S., Yonkers, NY  
Thetsu Mon, M.D., Brighton, MA  
Elana Monchar, M.D., Elizabeth, NJ  
Desiree Ann Montes, D.O., Claremont, CA  
Kristin Moore, M.D., Chicago, IL  
Nakita Monique Moore, M.D., Temple, TX  
Sean Moore, M.D., Seattle, WA  
Sonal Kishore Moratschek, M.D., Shaker Heights, OH  
Alvaro Moreno, M.D., Dickinson, TX  
Stacy Bridgette Morgan, D.O., Daytona Beach, FL  
Wynne Shepard Morgan, M.D., Worcester, MA  
Danielle Brooke Morgan-Goerke, D.O., Minneapolis, MN

Jessica Wallace Morine, M.D., Boston, MA  
Abby Hope Morris, M.D., Chevy Chase, MD  
Susie Morris, M.D., Los Angeles, CA  
Lindsey Mortenson, M.D., Ann Arbor, MI  
Wayne Stuart Moss, M.D., North Platte, NE  
Rachel L Moster, M.D., Bronx, NY  
Radhika Movva, M.D., Sewickley, PA  
Karen Jennings Mu, M.D., San Francisco, CA  
Heather Muhr, D.O., Berkeley, CA  
Shubi Razdan Mukatira, M.D., Germantown, TN  
Tilottoma Mukherjee, M.D., Waltham, MA  
Emily Hazel Mukherji, M.D., Somerville, MA  
Firoz Bashirahmed Munshi, M.D., Fresno, CA  
Daniel Abel Murray, M.D., Saint Louis, MO  
Phillip Michael Murray, M.D., New York, NY  
Claude Murugen, M.D., Houston, TX  
Tanvir Mushtaq, M.D., Wheaton, IL  
Kerry Lynn Musick, M.D., Bluefield, WV  
Rafael Bienvenido Mustafa Michel, M.D., Brooklyn, NY  
Manasa Musunuri, M.D., Louisville, KY  
Padmapriya Musunuri, M.B.B.S., Chalfont, PA  
Muhammad Arslan Muzaffar, M.B.B.S., Barboursville, WV  
Sona Neelesh Nadkarni, M.D., Wexford, PA  
Christopher Nadorff, M.D., Columbus, OH  
Madhavi Latha Nagalla, MD, Kentwood, MI  
Shivana Devi Naidoo, M.D., Queens Village, NY  
Manish Manmadhan Nair, M.D., Plano, TX  
Behrouz Namdari, M.D., Durham, NC  
Cyrus Nasserian, M.D., Glendora, CA  
Padmavathy Nataraj, M.D., Hoover, AL  
Leigh Nicole Nathan, M.D., New Haven, CT  
Martin David Nau, M.D., Brooklyn, NY  
Sadiq Naveed, M.D., Lenexa, KS  
Salma Nazneen, M.D., Jamaica, NY  
Mouhamed A. Ndiaye, M.D., Waterbury, CT  
Derek William Neal, M.D., League City, TX  
Susan Teresa Neilan, M.D., Hudson, OH  
Susan Proctor Nelsen, M.D., Coralville, IA  
Jessica Nelson, M.D., Lubbock, TX  
Rosallynn Nelson, M.D., Houston, TX  
Deina Sayed Nemiary, M.D., Vestavia, AL  
Morgan Walker Nesmith, M.D., Tampa, FL  
Samuel Neuhut, M.D., Bay Harbor Islands, FL  
Bhusan Neupane, M.D., Roanoke, VA  
Michael David Nevarez, M.D., Boston, MA  
Daniel Newman, M.D., Atlanta, GA  
Melody Dannette Newson, M.D., Omaha, NE  
Matthew R Newton, D.O., Dayton, OH  
Dan Hai Nguyen, M.D., Portland, OR  
Nam Hoang Nguyen, D.O., Auburn, WA  
Nhu Doan Nguyen, M.D., Costa Mesa, CA



Sanh Van Nguyen, D.O., Denver, CO  
Theresa Toquyen Nguyen, D.O., Kirksville, MO  
Elizabeth Nicholson, M.D., Charlotte, NC  
Matthew J. Niedzwiecki, M.D., Cranston, RI  
Brian Lewis Niehaus, M.D., San Carlos, CA  
Elizabeth Street Niemiec, M.D., Newport, RI  
Marelise Nieuwenhuizen, M.B.Ch.B., South Charleston, WV  
Catalina Maria Nino, M.D., Jackson Heights, NY  
Ahmed Raslaan Nizar, M.D., Jamesville, NY  
Shawn Noor, M.D., University Place, WA  
Gulam Ali Akther Noorani, M.D., M.P.H., Sewickley, PA  
Kenneth Christopher Novoa, M.D., Boston, MA  
Brendan Joseph O'Connor, M.D., Saint Louis, MO  
Jessica O'Neil, D.O., Essex Junction, VT  
Maria Luisa Obregon, M.D., San Antonio, TX  
Betsy Shapiro OBrien, M.D., New York, NY  
Kelechi Okeoma Ogbonna, M.B.B.S., Valley Stream, NY  
Kiyoko Rachel Ogoke, M.D., Bronx, NY  
Olajide Kayode Oguntuase, M.B.B.S., Kansas City, MO  
Ejine Okoroafor, M.D., Las Vegas, NV  
Mayumi Okuda Benavides, M.D., New York, NY  
Chandra M Oleksiewicz, M.D., Portland, OR  
Adeliza Olivero, M.D., East Boston, MA  
Jessica Anne Olsen, M.D., Palm Beach Gardens, FL  
Natasha Smith Onasanya, M.D., M.P.H., Eagle River, AK  
Kalu Onuma, M.D., Saint Louis, MO  
David L Orme, M.D., Pleasant View, UT  
Adela Yrma Ortega, M.D., Mays Landing, NJ  
Christian Ortiz, M.D., Dallas, TX  
Austin Ballard Osborn, M.D., Memphis, TN  
Mary Kathryn Osborne, M.D., Montgomery, AL  
Geneva Marie Osteen, M.D., Baltimore, MD  
Kingsley Osuagwu, M.B.B.S., Kansas City, MO  
Uzoma Chris Osuchukwu, M.D., Lindenhurst, NY  
Melanie Violet Ottenbacher, M.D., Corpus Christi, TX  
Judith Lawrence Outten, M.D., Rydal, PA  
Ashley M Overley, M.D., New York, NY  
Eisaku Oyama, M.D., Forest Hills, NY  
Adewale Olatunji Oyemade, M.D., New Orleans, LA  
Larry U Ozowara, M.D., New York, NY  
Ajay Kumar Pachipulusu, M.B.B.S., Rosemount, MN  
Christine Pacold, M.D., Alma, MI  
Auralyd Padilla, M.D., Northborough, MA  
Jaya Padmanabhan, M.D., Waltham, MA  
Mariela Teresa Padro, M.D., Long Island City, NY  
Joshua Joel Pagano, D.O., Garner, NC  
Pegah Pajouhi, M.D., Folsom, CA  
Sarita Pal, M.D., Phoenix, AZ  
Kosmas Casey Alexander Paleos, M.D., New York, NY  
Michelle Lynn Palumbo, M.D., Brookline, MA  
Pavan Pamadurthi, M.D., Frisco, TX

Diana Marie Pandey, M.D., Minneapolis, MN  
Alexander Papp, M.D., San Diego, CA  
Tayyab I Paracha, M.D., Purcellville, VA  
Priyanki Pareek, M.B.B.S., Highland Park, NJ  
Keyur Hareshbhai Parikh, M.D., Menomonee Falls, WI  
Sonia Sabharwal Parikh, M.D., Redwood City, CA  
Minkyung Park, M.D., Rockville, MD  
Sylvia Park, M.D., Pikesville, MD  
Thomas Soon Park, M.D., Ann Arbor, MI  
Kristin Leann Parkinson, M.D., Columbia, MO  
Darshan Patel, M.D., Mableton, GA  
Himanshu Rasiklal Patel, M.D., Mesa, AZ  
Rachit H. Patel, M.D., Stamford, CT  
Rajesh Manharbhai Patel, M.D., Wayne, NJ  
Sangeeta Girish Patel, M.D., Denver, CO  
Kamal Pathak, M.D., Miami Beach, FL  
Smita Patibandla, M.D., Fishers, IN  
Mary Howard Estler Patrick, M.D., Huntington, WV  
Nancy Ann Pattison, M.D., East Grand Rapids, MI  
Sean Edward Paul, M.D., Celebration, FL  
Robert Harrison Paull, M.D., San Antonio, TX  
Keith Pearlman, M.D., Brooklyn, NY  
Joanna Kristine Pearson, M.D., Carrboro, NC  
William Shelton Pearson, M.D., Ocean Springs, MS  
Stephanie Lee Peglow, M.D., West Haven, CT  
Jaya Praveen Kumar Penagaluri, M.D., Towson, MD  
Cristian Penciu, M.D., Danbury, CT  
Anne Elizabeth Penner, M.D., Denver, CO  
Marilyn Peraza, M.D., Miami, FL  
David Lewis Perez, M.D., Brookline, MA  
Jesus Perez, M.D., Bakersfield, CA  
Maria Milagros Perez-Coste, M.D., New York, NY  
Joseph Perry, M.D., Guilford, CT  
Melissa Perry, M.D., North Tonawanda, NY  
Denise Renee Persichino, D.O., Rancho Cucamonga, CA  
Erik John Petersen, M.D., Richmond, VA  
Christine Elizabeth Petrich, M.D., San Antonio, TX  
Sanja Petrovic-Stojkovic, M.D., Boston, MA  
Alena S Petty, D.O., Phoenix, AZ  
Asa Pannel Pharr, M.D., New Orleans, LA  
Jessica Catherine Phelps, M.D., Pewaukee, WI  
Willy Philiias, M.D., Glen Oaks, NY  
Blake Phillips, M.D., Brooklyn, NY  
Ira Phillips, M.D., Nashville, TN  
Joshua David Phillips, M.D., Lake Geneva, WI  
Madeleine Philpot, M.D., Rolla, MO  
Nyota May Pieh, M.D., New York, NY  
Lemaire Leo Pierre, M.D., Minneapolis, MN  
Matthew Pierson, M.D., Salt Lake City, UT  
Donald J Pilch, M.D., Syracuse, NY  
Trinadha Rao Pilla, M.D., Chatham, IL

Nicholas Karol Piotrowski, M.D., Farmers Branch, TX  
Sarah Piper, M.D., Oakland, CA  
Christopher Francis Pirok, M.D., Manhattan Beach, CA  
Mustafa Pirzada, M.D., Parkland, FL  
Jessica Lauren Plauche, M.D., New York, NY  
Suhasini Pokala, M.D., Columbia, MO  
Venkat Polavarapu, M.D., Pittsburgh, PA  
Zoya Popivker, D.O., Baltimore, MD  
Angelo Algas Potenciano, M.D., Slingerlands, NY  
Michael Francis Potesta, M.D., Youngstown, OH  
Mon Cherukarayil Poulouse, M.D., Grand Rapids, MI  
Vinita Prasad, M.B.B.S., Wadsworth, OH  
Gabriela Prieto, M.D., Albuquerque, NM  
Mili Priyanka, M.D., Allston, MA  
Jessica Prowell, M.D., Gainesville, FL  
David Johann Puder, M.D., Redlands, CA  
Dara N Pumphrey-Ruiz, M.D., Oak Park, IL  
Manoj Puthiyathu, M.D., Hackensack, NJ  
Kristen Pyrc, M.D., Durham, NC  
Anatoliy Pyslar, M.D., Skokie, IL  
Asfia Qaadir, D.O., Rochester, MN  
Sofia Qadir, M.D., Windermere, FL  
Rabia Qazi, M.D., Chadds Ford, PA  
Uyen-Khanh Quang-Dang, M.D., San Francisco, CA  
Brian Quinn, M.D., Louisville, KY  
Elmer Quintero, M.D., Niskayuna, NY  
Mariam Rabya Qureshi, M.D., Eden, NC  
Mahmudur Rabbi, M.D., Culpeper, VA  
Revital Racin, M.D., Newton, MA  
Alexandar Ivanov Raev, M.D., Portland, ME  
Sonia Raheja, M.D., San Francisco, CA  
Rahim Nizar Rahemtulla, M.D., New York, NY  
Sabreen Rubaida Rahman, M.D., Farmington Hills, MI  
Sheeba Rahman, M.D., Holtsville, NY  
Sasha Rai, M.B.B.S., Lakewood, CO  
Samina Raja, M.D., Fairfax, VA  
Shirley Mary Rajan, M.D., Worcester, MA  
Meena Rajendren, M.D., Oakland, CA  
Anthony John Ramirez, M.D., Warner, NH  
Rhodelynn Pasion Ramos, M.D., Waipahu, HI  
Ujjwal Premchand Ramtekkar, M.B.B.S, MPE, Saint Louis, MO  
Navtej Randhawa, M.D., Chicago, IL  
Sundeeep Singh Randhawa, M.D., New York, NY  
Swati Rao, M.D., Sacramento, CA  
Vandana Sethi Rao, M.D., Dallas, TX  
Aparna Nimish Raote, M.D., Jersey City, NJ  
Erica Kirsten Rapp, M.D., Denver, CO  
Pramit Rastogi, M.D., Baltimore, MD  
Ijaz Rasul, MD, Chapel Hill, NC  
Rohini Ravindran, M.D., Flower Mound, TX  
Mustafa M Rawaf, D.O., Las Vegas, NV

Shona Lee Ray-Griffith, M.D., Little Rock, AR  
Ubha Rayamajhi, M.D., Virginia Beach, VA  
Syed-Asad Raza, M.D., Plano, TX  
Syed Kamran Razi, M.D., Loudonville, NY  
Melissa M. Rector, M.D., Houston, TX  
Navin Reddy, M.D., Washington, DC  
Sankrant Reddy, M.D., Springfield, IL  
Sukruthi Reddy, M.D., Foster City, CA  
David Frederick Redinger, M.D., Louisville, KY  
Harpreet Reeba, M.D., Glendale, NY  
Sarah Reed, M.D., Sacramento, CA  
Laura Reese, M.D., Ann Arbor, MI  
Kevin Reeves, M.D., Columbus, OH  
Nicholas Peter Reeves, M.D., San Francisco, CA  
Guyton Register, M.D., Roanoke, VA  
Kristen Jonelle Reid, M.D., New Haven, CT  
Abby Lynn Reineck, M.D., Guilford, VT  
Michael M Reinhardt Jr., M.D., Brooklyn, NY  
Keith W. Reitz, M.D., Watertown, NY  
Fathima Reyman, M.B.B.S., Raleigh, NC  
Nabil A. Rezk, M.D., Forest Hills, NY  
Krista Dawn Rhodes, M.D., Charleston, WV  
Sabeen Jawad Riaz, M.B.B.S, McKinney, TX  
Natalie Barbara Virginia Riblet, M.D., Hanover, NH  
Elizabeth Connie Ricciardi, D.O., Las Vegas, NV  
Timothy Reynolds Rice, M.D., New York, NY  
Erica Martin Richards, M.D. PhD, Washington, DC  
India Christine Richards, M.D., Austin, TX  
Sarah L. Richards Kim, M.D., New York, NY  
Anne Shelton Richardson, M.D., Huntersville, NC  
Adam Richmond, M.D., Lone Tree, CO  
Jeffrey Richmond, M.D., Morgantown, WV  
Kenneth Raphael Richmond, M.D., Fort Monroe, VA  
James Allen Rigell, M.D., Madison, WI  
Janice A Rios Loubriel, M.D., San Juan, PR  
Kimberly Catherine Riquelme, D.O., Glen Oaks, NY  
Jared Tristan Ritter, M.D., Palm Coast, FL  
Karla Varela Rivera, M.D., San Antonio, TX  
Erick Rizzotto, M.D., San Anselmo, CA  
Eric Adam Robbins, M.D., Hollywood, FL  
Toya Denise Roberson, M.D., Chicago, IL  
Inna Z Roberts Dr., M.D., Princeton, NJ  
Kimberly Robinson, M.D., Campbell Hall, NY  
Xiomara de Los Angeles Rocha-Cadman, M.D., Old Greenwich, CT  
Joshua Joseph Rodgers, M.D., Houston, TX  
Claudia Patricia Rodriguez, M.D., Brighton, MA  
Mark Anthony Rodriguez, M.D., Phoenix, AZ  
Rachel Rodriguez, M.D., New York, NY  
Yajaira Rodriguez, M.D., Manlius, NY  
Sarah Ley Roff, M.D., Portland, OR  
Adriana Belen Rojas Jimenez, M.D., San Juan, PR

Heide Hullsiek Rollings, M.D., Chicago, IL  
Daniel Romulus Roman, M.D., New York, NY  
Sally D. Romano, M.D., Middlebury, CT  
Luke Billmeyer Rosen, D.O., Vancouver, WA  
Miri Rosen, M.D., Flushing, NY  
Isabel Ross, M.D., Albuquerque, NM  
Rachel Amy Ross, M.D., Boston, MA  
Kasia Gustaw Rothenberg, M.D., Ph.D., Shaker Heights, OH  
Daniel Flaherty Rowe, M.D., Worcester, MA  
Lisa Marie Ruiz, M.D., Salt Lake City, UT  
Madlena Todorova Rush, D.O., Winston Salem, NC  
Valaiporn Joy Rusmintratip, M.D., Atherton, CA  
Daniel Francis Ruthven, M.D., Baltimore, MD  
Wesley Ryan, M.D., seattle, WA  
Helen Hyun Ryu, M.D., Flushing, NY  
Tammy Saah, M.D., San Jose, CA  
Leila Sadeghi, M.D., Newport, RI  
Emily A Sadik, D.O., Portland, OR  
Renee Catherine Saenger, M.D., Tarrytown, NY  
Sina Safahieh, M.D., Newport Beach, CA  
David Safani, M.D., Orange, CA  
Yauss Safavi, M.D., New Haven, CT  
Gregory Lee Sahlem, M.D., Mount Pleasant, SC  
Ayesha Sajid, M.B.B.S., Fishers, IN  
Sumera Salamat, M.D., Tomball, TX  
Mario Luis Salguero Galland, M.D., La Jolla, CA  
Anoosh Salman, M.D., Champaign, IL  
Amandeep Singh Saluja, M.D., Kentwood, MI  
Samuel Inimbom Samuel, M.D., Macon, GA  
Irina Feodor Samuels, M.D., Centreville, VA  
Maria Chona Pili San Gabriel, M.D., New York, NY  
Marsal Sanches, M.D., Bismarck, ND  
Dustin Gabriel Sanchez, M.D., Santa Monica, CA  
Joel Manuel Sanchez, M.D., Grand Ledge, MI  
Brandon Davis Sanders, M.D., Chicago, IL  
Gurpreet Singh Sandhu, M.D., Granger, IN  
Harjesus Singh Sandhu, M.B.B.S., University Place, WA  
Jaskaran Singh Sandhu, M.D., Fresno, CA  
Amritpal Singh Sasan, M.D., Brampton, ON  
Christopher Saslo, D.O., Ewing, NJ  
Sean Andrew Sassano-Higgins, M.D., Pasadena, CA  
Manjula Sathish, M.D., Ridgeland, MS  
Claudia Makadon Sauerteig, M.D., Philadelphia, PA  
Simona Sava, M.D., Middleboro, MA  
Jasmine Kaur Sawhney, M.D., Rockville, MD  
Jolene Katherine Sawyer, M.D., Los Angeles, CA  
Therese Ann Scavelli, M.D., Canton, OH  
Richard Schenkelberg, M.D., Springfield, IL  
Justin J. Schleifer, M.D., Providence, RI  
Scott T Schmidt, D.O., Rochester, MN  
Carla Wilhelmina Schnitzlein, D.O., Deridder, LA

Heather Schultz, M.D., Ann Arbor, MI  
Leah Schupp, M.D., Madison, WI  
Holly Nichole Schwartz, M.D., Los Angeles, CA  
Lori Sara Schwartz, M.D., Baltimore, MD  
Dumetz Rashad Scott, M.D., Columbia, SC  
Taylor Paige Scott, M.D., Crofton, MD  
Jeffrey Lorren Seal, M.D., San Francisco, CA  
Laura Seal, M.D., Des Moines, IA  
Samuel Anthony Sears, M.D., Dunlap, IL  
Dale Sebastian, M.B.B.S., New Haven, CT  
Wander Stenio Segura, M.D., Fairfield, CA  
Ritu Sehgal, M.D., Manchester, CT  
Huzaifa Abukari Seidu, M.D., Atlanta, GA  
Abdelrahman Selim, M.D., Bronx, NY  
Kamalendra Sen, M.D., Briarwood, NY  
Jacqueline Marie Sergie, M.D., New York, NY  
Karen Beth Seroussi, M.D., Austin, TX  
Carmen Rebeca Serpa, M.D., Clawson, MI  
Justine Sever, D.O., Tampa, FL  
Cherie Sgambati, D.O., Nashville, TN  
Bitu Shaghaghi, D.O., Pittsburgh, PA  
Chirag Gopaldas Shah, M.D., Brookfield, WI  
Kairav Rameshchandra Shah, M.D., Secaucus, NJ  
Kaushal Yogeshbhai Shah, M.D., Johnson City, TN  
Lasha D Shah, M.D., New York, NY  
Nikita K. Shah, M.D., New York, NY  
Vishal Pankajkumar Shah, M.D., Stow, OH  
Imran Mohammad Shakir, D.O., Itasca, IL  
Mahwish Shakir, M.D., Houston, TX  
Amin Shamal, M.D., Tracy, CA  
Ravi Shankar, M.D., Columbia, MO  
Kimberly Ann Shapiro, M.D., Studio City, CA  
Arlenne Shapov, M.D., Chula Vista, CA  
Rifat Manzoor Sharif, M.D., Shrewsbury, MA  
Bikash Sharma, M.D., Ellicott City, MD  
Preya Sharma, M.D., La Verne, CA  
Rajeev Sharma, M.D., Alexandria, VA  
Shephali Sharma, M.D., Austin, TX  
Sidharth Gautam Sharma, M.D., Dublin, CA  
Surendra Kumar Sharma, M.D., Knoxville, TN  
Erika M. Shavers, M.D., Aurora, IL  
Efrat Shavit, M.D., Concord, MA  
Inbar Shavit, M.D., Houston, TX  
Albert Cornelius Shaw, M.D., Columbia, MO  
Pamela Catherine Shay, D.O., Columbia, IL  
Patrick Shea, M.D., SLC, UT  
Fatima Mahnaz Sheikh, M.D., Puyallup, WA  
Raj Nanji Shekhat, M.D., Atlanta, GA  
Emily Jane Sheldon, M.D., Denver, CO  
Jillian Alexis Shellabarger, M.D., Yellow Springs, OH  
Seth Sherman, M.D., San Francisco, CA

Shashidhar Reddy Sheshani, M.D., Sarasota, FL  
David E Sheski, M.D., Los Angeles, CA  
Nitasha Shetty, M.D., New Haven, CT  
Marianna Shimonova, M.D., Seattle, WA  
Dmitriy Shmaryan, D.O., Studio City, CA  
Jerad Ray Shoemaker, M.D., Longview, WA  
Mark Charles Shoptaugh Jr., M.D., Baton Rouge, LA  
Seleena Meher Shrestha, M.D., Springfield, IL  
Dario Martin Shuster, M.D., Belle Harbor, NY  
Dil Ara Siddika, D.O., Jericho, NY  
Ayesha Silman, M.D., Philadelphia, PA  
Rebecca Silver, M.D., Charlotte, NC  
Michael Baran Silverberg, M.D., Berwyn, PA  
George Nick Silvers, M.D., Miami Beach, FL  
Thomas P. Simeone, M.D., Cranston, RI  
Alka Singal, M.D., Pembroke Pines, FL  
Jennifer Singarayer, M.B.B.S., Manlius, NY  
Devin Singh, M.D., Kissimmee, FL  
Joshna Singh, M.B.B.S., Williamsville, NY  
Karamjit Singh, M.D., Oakdale, CA  
Kuldeep Singh, M.D., Springfield, IL  
Karthik Sivashanker, M.D., Jamaica Plain, MA  
Bridget Skidmore, M.D., Morgantown, WV  
Stephanie Lynn Skow, M.D., Lihue, HI  
Maryn Sloane, M.D., New York, NY  
Zuzana Slobodnikova, M.D., Madison, MS  
Robert Dale Smeed Jr., M.D., Tampa, FL  
Darryl Curtis Smith, M.D., New York, NY  
Healy Gottlieb Smith, M.D., Brooklyn, NY  
Katherine Elise Smith, M.D., Shreveport, LA  
Laura Beth Smith, M.D., Moore, OK  
Laura Elizabeth Smith, D.O., Columbia, MO  
Lianne Kimberley Morris Smith, M.D., New York, NY  
Melissa Smith, M.D., Atlanta, GA  
Tracy Snell, D.O., Ph.D., Ferndale, MI  
Loren Sobel, M.D., Pittsburgh, PA  
Kim Elaine Soden, M.D., Ann Arbor, MI  
Janet Modad Soeprono, M.D., Mercer Island, WA  
Thomas Modad Soeprono, M.D., Seattle, WA  
Stacy Ann Solheim, D.O., Dayton, OH  
Xiaoling Song, M.D., Elmhurst, NY  
Rishi Sood, M.D., Long Island City, NY  
Christopher Sorensen, M.D., Pittsford, NY  
Max Spaderna, M.D., Nashville, TN  
Marc Jonathan Spelar, M.D., Charleston, WV  
Daniel Bonneson Spencer, M.D., Pawtucket, RI  
Lee Samuel Spencer, M.D., Dallas, TX  
Jessica Anne Sperber, M.D., San Diego, CA  
Domenick John Sportelli, D.O., Montville, NJ  
Lauren Spring, M.D., Stony Brook, NY  
Rajeev Srivastava, M.D., Williamsburg, VA

Andrea Dawn St. Clair, D.O., Tulsa, OK  
Diane St. Fleur, M.D., Syracuse, NY  
Michael Dillard Stark, M.D., Greenwood, IN  
Christopher Scott Stauffer, M.D., San Francisco, CA  
Alexander Stegeman, D.O., Saint Paul, MN  
Joshua David Stein, M.D., Minnetonka, MN  
Massoud Stephane, M.D., Portland, OR  
Felix Sterling, M.D., Brooklyn, NY  
Adam Philip Stern, M.D., Boston, MA  
Mirica Artine Stevens, D.O., Cleveland, OH  
Jon David Stiffler, M.D., New York, NY  
Kelly Nicole Stinson, M.D., Dayton, OH  
Veronika Stock, M.D., Boston, MA  
Mihaela Valentina Stoica, M.D., Irving, TX  
Danijela Stojanac, M.D., New Haven, CT  
Stephanie Stolberg, M.D., New York, NY  
Terri Stonehocker, M.D., Norman, OK  
Joel Strauch, M.D., Minneapolis, MN  
Marissa Stridiron, M.D., West Orange, NJ  
Devin Michael Stroman, M.D., Los Angeles, CA  
Linda A Stull, D.O., Clarendon Hills, IL  
Michael X Su, M.D., Havertown, PA  
Akm Sulaman, M.D., Midlothian, VA  
Catherine Elizabeth Sullivan, M.D., Brighton, MA  
Scott Matthew Summers, M.D., Sacramento, CA  
Xiaowei Sun, M.D., Great Neck, NY  
Dawn Sung, M.D., Moraga, CA  
Kristen DeAnn Sutley, M.D., Edina, MN  
Jennifer L Sweet, M.D., New York, NY  
Matthew J. Swenson, M.D., Provo, UT  
Fauzia Nisar Syed, M.D., Columbia, MD  
Magdalena Ewa Szklarska-Imiolek, M.D., Rochester, NY  
Fawad Taj, M.D., Cleveland, OH  
Makan Talayeh, M.D., Los Angeles, CA  
Soheyla Talebimarandi, M.D., San Diego, CA  
Alison Tam, M.D., Brighton, MA  
Bih Bikelle Tambi, M.D., Jacksonville, FL  
Haiwang Tang, M.D., Edmond, OK  
Kunal Bhikhalal Tank, M.B.B.S., Grove City, OH  
Paul S Taraska, M.D., Greenwood, IN  
Mudassar Tariq, M.D., Houston, TX  
Tetyana Tarnavsky, M.D., Sharon, MA  
Nelya Tarnovetsky, M.D., Staten Island, NY  
Shannon Lindsay Terkell, M.D., Riverside, RI  
Akanksha Thakur, M.D., New Orleans, LA  
Gloria Patricia Thambirajah, M.D., Poughkeepsie, NY  
Jayaselvi Thanaseelan, M.D., Sugar Land, TX  
Poonam K. Thandi, M.D., Houston, TX  
Mona Thapa, M.B.B.S., New Haven, CT  
Richa Thapa, M.D., Little Rock, AR  
Shalini Tharani, M.D., Glendale, CA



Shilpa Thayyullathil, M.D., Brooklyn, NY  
Jeanne Marie Theobald, M.D., Denver, CO  
Ketty Thertus, M.D., Boston, MA  
Melinda Thiam, M.D., Columbia, SC  
Paul Thisayakorn, M.D., Cleveland, OH  
Lisa Elaine Thom, M.D., Tucson, AZ  
Kelton Manor Thomas, M.D., Dallas, TX  
Natasha Merlyn Thomas, M.D., Pasadena, CA  
Sandra Thomas, M.D., Roswell, GA  
Megan Patricia Thompson, D.O., Baton Rouge, LA  
Tiffany Nicole Thomure, M.D., Georgetown, TX  
Michelle Lynn Thorpe, M.D., Parsippany, NJ  
Wales Thottathikunnath George, M.B.B.S., Prospect Hill, NC  
Jeremy Easton Thueson, M.D., Seattle, WA  
Nuria J Thusius, M.D., Rochester, MN  
Nina Marie Tioleco, M.D., New York, NY  
Dimas Tirado-Morales, M.D., Cordova, MD  
Jacob Robert Tjaden, D.O., Saint Paul, MN  
Christina Tjok, M.D., Houston, TX  
Lindsay Shotts Tobler, M.D., Kansas City, MO  
Helen Tobon, M.D., Rancho Cordova, CA  
Stephen Philip Tokraks, D.O., San Diego, CA  
Mirela E Toma-Opruta, M.D., Ridgewood, NY  
Kathryn Katie Tompkins J, M.D., Boston, MA  
Ramanpreet Toor, M.D., Bellevue, WA  
Erin Sullivan Torday, M.D., Philadelphia, PA  
Vanessa Torres-Llenza, M.D., Washington, DC  
Ashley D'Ann Toutouchi, M.D., Houston, TX  
Daniel Towns, D.O., Portland, OR  
Travis Townsend, M.D., Albuquerque, NM  
Sinh Tran, M.D., Irvine, CA  
Tho Van Tran, M.D., Orange, TX  
Maria del Pilar Trelles Thorne, M.D., New York, NY  
Joseph Trettel Jr, M.D., Ph.D., Meriden, CT  
Dimitrios M. Tsatiris, M.D., Brecksville, OH  
Igor Vladimirovich Tseyko, M.D., Pittsburgh, PA  
Andrey Tsyss, D.O., Austin, TX  
Jennilee Ann Tuazon, M.D., Los Angeles, CA  
Jimena Tuis-Elizalde, M.D., Milford, CT  
Peter Emmanuel O. Turkson, D.O., Cleveland Heights, OH  
Ana Thomas Turner, M.D., Gainesville, FL  
Mary Elizabeth Turner, M.D., Portland, OR  
Alisa Turok, M.D., New York, NY  
Marlene Carino Tuscano, M.D., Phoenix, AZ  
Allison Tweedie, M.D., Fairfax, VA  
Maureen Ann Ullrich, M.D., Denver, CO  
Sri Venkata S.N.V.V. Uppalapati, M.B.B.S., Ann Arbor, MI  
Marina Urman Yotam, M.D., Redwood City, CA  
Stefan Ursu, M.D., Houston, TX  
Irmute Usiene, M.D., Ridgewood, NJ  
Ifeyinwa Ngozi Utah, M.B.B.S., Henrico, VA

Susan Chukwuchebeanyi Uyanna, M.D., De Pere, WI  
Munachim Ifeoma Uyanwune, M.D., Towson, MD  
Shri Kant Vaish, M.D., Lexington, KY  
Emil Vakar, D.O., Metuchen, NJ  
Elia Margarita Valladares Juarez, M.D., Charlottesville, VA  
Lucas C. Van Dyke, M.D., Oakland, CA  
Christopher Andrew Van Schenck, M.D., Ripon, CA  
David Vargas, M.D., Oak Park, CA  
Seema Susan Varghees, M.D., Austin, TX  
Maria Varvara, M.D., New York, NY  
Shawn Vasdev, M.D., Oakville, ON  
John Michael Vaszari, M.D., Seattle, WA  
Carrie Anne Hoyt Vaudreuil, M.D., Boston, MA  
Snehamala Veeravalli, M.D., Owensboro, KY  
Nina M Vega Vazquez, M.D., Juana Diaz, PR  
Ramakrishna Reddy Veluri, M.D., Irving, TX  
Sangeetha Venkataramanan, M.D., McDonough, GA  
Geetika Mehrishi Verma, M.D., Edmond, OK  
Shweta Verma, M.D., Burke, VA  
Heather Speller Vestal, M.D., Boston, MA  
Kelley Jean Victor, M.D., Pittsburgh, PA  
Silvie Rajbhandari Vijayananda, M.D., Overland Park, KS  
Dmitry Vilensky, M.D., State College, PA  
Jennifer Ann Ilene Vinch, M.D., Shelby Township, MI  
Kristen E. Vines, M.D., Columbus, GA  
Jamie Vizcarra, D.O., Rensselaer, NY  
Michelle L. Vo, M.D., Salt Lake City, UT  
Charles Jacob von Bose, D.O., Kaysville, UT  
Anvi Kandarp Vora, M.D., New York, NY  
Ha Vu, D.O., Addison, TX  
Shubhrajana Singh Wadyal, M.D., Inverness, IL  
Aryan Wahab, M.D., Ajax, ON  
Sarah Mallard Wakefield, M.D., Lubbock, TX  
Ryan Wakim, M.D., Morgantown, WV  
Blair Easton Walker, M.D., Austin, TX  
Cory Rae Walker, D.O., Houston, TX  
Marie Christine Walker, M.D., Brentwood, MO  
Emma K. Wall, M.D., Santa Barbara, CA  
Erin Wallace, M.D., Portland, OR  
Leorah M Walsh, M.D., Durham, NC  
Le-Ben Wan, M.D., Long Island City, NY  
Jagdeep Singh Wander, M.D., Salem, VA  
Joshua Junhua Wang, M.D., Plano, TX  
Linda Lanlan Wang, M.D., Temple City, CA  
Ying Wang, M.D., Quincy, MA  
Jennifer Erin Ward, M.D., Austin, TX  
Monica Ward, M.D., Atlanta, GA  
Rachel Allen Ward, M.D., Gaylord, MI  
Nisha Warikoo, M.B.B.S., Irvine, CA  
Jessica L. Warner, M.D., Providence, RI  
Larry Wedell Warner, M.D., Gonzales, LA

Mark B Warren, M.D., Caldwell, ID  
Michael Washinsky, D.O., Durango, CO  
Tobias Wasser, M.D., Southbury, CT  
Andrea Patrice Watkins, M.D., Silver Spring, MD  
Terese Zakiya Watkins-Laptiste, M.D., New York, NY  
Rachel Waxman, M.D., Woodmere, NY  
Matthew Way, M.D., Port Angeles, WA  
Susanne Elizabeth Weber, M.D., Seattle, WA  
Samuel H Wedes, M.D., Livonia, MI  
Sara Weekly, M.D., Brooklyn, NY  
Jodi Weinstein, M.D., New York, NY  
Mark Weisman, M.D., Tampa, FL  
Ashley Weiss, D.O., New Orleans, LA  
Kija Marie Weldon, M.D., Tiffin, IA  
Nicole Nelson Welle, M.D., Fergus Falls, MN  
Melissa Anne Wellner, M.D., Severna Park, MD  
David John Whaley, M.D., Sioux Falls, SD  
Stephanie Ross White-Bateman, M.D., Concord, MA  
Laura Brave Whiteley, M.D., Providence, RI  
James Edward Wicht, M.D., Bethesda, MD  
Robert B. Wieck, D.O., Whiteman Afb, MO  
Mary Kathleen Wilber, D.O., Cambridge, MA  
Stephen Alexander Wilkes, M.D., Lyndhurst, OH  
Arthur Robin Williams IV, M.D., New York, NY  
Daisy Williams, D.O., Hummelstown, PA  
David Russel Williams, M.D., Augusta, GA  
Joseph Benjamin Williams, M.D., Raleigh, NC  
Kirsten Williams, M.D., Boise, ID  
Nolan Ryan Williams, M.D., San Francisco, CA  
Wendol Arthur Williams, M.D., Madison, CT  
Genevieve Anne Williamson, M.D., North Ferrisburgh, VT  
Alex Brent Wills, M.D., Boise, ID  
Barbara Ann Wilson, M.D., Lyme, NH  
Jo Ellen Wilson, M.D., Nashville, TN  
John Wilson, M.D., Portland, OR  
Gerald Scott Winder, M.D., Ann Arbor, MI  
John William Wirick, M.D., Covington, KY  
Renee Tovah Witlen, M.D., Belmont, MA  
Justine Reeder Wittenauer, M.D., Medina, OH  
Allyson Witters, M.D., Nashville, TN  
Jonathan Pittman Wolf, M.D., Potomac, MD  
Keith Marshall Wood, M.D., San Francisco, CA  
Dahlia Ditsworth Woods, M.D., Mountain View, CA  
Katharine Woods, D.O., West Hartford, CT  
Brandon Michael Workman, D.O., Daniels, WV  
Elizabeth Anne Worsham, M.D., Jacksonville, FL  
Peter Wu, M.D., Brooklyn, NY  
Weiran Wu, M.D., San Antonio, TX  
Chunying Xu, M.D., Horseheads, NY  
Huiping Xu, M.D., Houston, TX  
Audra Yadack, M.D., Pawtucket, RI

Hardik Yadav, M.B.B.S., Baltimore, MD  
Sanjay Yadav, M.D., Chestnut Hill, MA  
Jennifer Mae Yager, D.O., Albany, NY  
Limei Yang, M.D., Norman, OK  
Yu Yang, M.D., Forest Hills, NY  
Yvonne Sue Yang, M.D., Los Angeles, CA  
Rama Krishna R. Yarasani, M.D., Waltham, MA  
Virginia Dejesus Yates, M.D., Augusta, GA  
Javaidia Beena Yazdani, M.D., Houston, TX  
Brandon Yeager, M.D., Corvallis, OR  
Jessica Michele Yeatermeyer, M.D., Washington, DC  
Vladislav L. Yeganov, M.D., Dallas, TX  
Lynn Yen, M.D., Los Angeles, CA  
Johnathon Prentice Yost, M.D., Mattoon, IL  
Amy Younai, M.D., Huntington, NY  
Byron Mark Anthony Young, M.D., Brooklyn, NY  
Branden Youngman, D.O., Philadelphia, PA  
Mohammed Younus, M.D., Baltimore, MD  
Angela Hweicin Yu, M.D., Anaheim, CA  
KwiYun Cassie Yu, M.D., Seattle, WA  
Lawrence Yu, M.D., Tustin, CA  
Xiaohong Yu, M.D., Chicago, IL  
Benjamin Louis Yudkoff, M.D., Newton, MA  
David Edmond Yunis, M.D., Lewes, DE  
Christal Costello Yuo, M.D., Pittsburgh, PA  
Syed Kamil Ali Zaidi, M.D., Pinellas Park, FL  
Isheeta Zalpuri, M.B.B.S., Cerritos, CA  
Tauheed Zaman, M.D., San Francisco, CA  
Jade Zapata, M.D., San Francisco, CA  
Gisoo Zarrabi, M.D., Torrance, CA  
Gilberto E. Zayas Pla, M.D., San Diego, CA  
Tamara Zec, M.D., New Haven, CT  
Asima Ali Zehgeer, M.D., Avon, CT  
Peter Zemenides, M.D., Chicago, IL  
Stamatis Andreas Zeris, M.D., Minneapolis, MN  
Fei Zhang, M.D., Melbourne, FL  
Yuanfen Zhang, M.D., Potomac, MD  
Danhong Zhao, M.D., Sioux Falls, SD  
Adrian Zhubi, M.D., Naperville, IL  
Zainab Zia, M.B.B.S., plano, TX  
Jonathan Derk Zimmerman, M.D., New York, NY  
Manish Zinzuvadia, M.D., New York, NY  
Michelle Diane Zipperman, M.D., Seattle, WA  
Svetlana Zoueva, M.D., Greenville, NC  
Jarred Cory Zucker, M.D., Brooklyn, NY

**Announcing diplomates of the ABPN for: Certification in Psychiatry, Part II, awarded September 26, 2014**

Qamrun Abedin, M.D., Bedford, NY  
Luis Francisco Acevedo Rodriguez, M.D., Caguas, PR  
Bello Abdullahi Adejoh, M.D., Chesterfield, MO  
Kayode Omoshola Adunbarin, M.D., Moorestown, NJ  
Naeem Aftab, M.D., Newburgh, NY  
Ghazala Nizam Ahmed, M.D., Fort Wayne, IN  
Fetih Akgul, M.D., Fargo, ND  
Lilian Roldan Aldana-Bernier, M.D., Maplewood, NJ  
Usman Ali, M.D., Hollidaysburg, PA  
Phillip James Archer, M.D., Southfield, MI  
Eram Baig, M.D., Hawthorne, CA  
Wellesley Bailey, M.D., Eagleville, PA  
Osama Bankesly, M.D., Bellevue, WA  
Alla Victorovna Baskakova, M.D., Cincinnati, OH  
John William Beckner Jr., M.D., Summerville, GA  
Stella Belyavsky, M.D., New York, NY  
Manjula Prakash Borge, M.D., Cambridge, MD  
Marta Renee Bowen, M.D., Durham, NC  
Irene Ciovica, M.D., Loma Linda, CA  
Michael Steven Cohen, M.D., Wynnewood, PA  
Jennifer Susan Colvin, M.D., Ph.D., Chapel Hill, NC  
Maria Teresa Daclan, M.D., Galloway, NJ  
Robert Joseph Dragert, D.O., Pennington, NJ  
Paulo Guinsatao Espanola, M.D., Stockton, CA  
Jessica Evelson, M.D., Boca Raton, FL  
Bonnie Ann Marie Fenyar, M.D., Toms River, NJ  
Allen Drew Fields, M.D., Richmond Hill, GA  
Lisa Danita Ford-Crawford, M.D., Mobile, AL  
Maria Esther Garcia, M.D., Cliffside Park, NJ  
Lakshmi Sunitha Garlapati, M.D., Grosse Pointe Shores, MI  
Javed Ghani, M.D., Saint James, NY  
Rhoda Jean Gottfried, M.D., Champaign, IL  
Roger L Greiger, M.D., Waban, MA  
Ryan Leland Hargraves, M.D., Colorado Springs, CO  
Brenda Fagan Harris, M.D., Asheville, NC  
David Keith Harris, M.D., Farmington Hills, MI  
Youssef Khalil Hassoun, M.D., Great Neck, NY  
Nelson Anibal Hernandez, M.D., Port Charlotte, FL  
Carolyn Paras Hizon, M.D., North Royalton, OH  
Sheikh Mohammad Israr, M.D., Fremont, CA  
Ibrahim Ali Khaja, M.D., Lombard, IL  
Niaz Ahmed Khan, M.D., Miramichi, NB  
Edward Joseph Kilbane, M.D., Palo Alto, CA  
Gisela E Knebl Kohl, M.D., Lewisville, NC  
Ryan C Kobyliniski, D.O., Edinboro, PA  
Mani Abraham Kurien, M.D., Rochester, NY  
Neelofar Lalani, M.D., Oklahoma City, OK  
Maria Theresa Liquete, M.D., Maryville, TN

Michelle Irene Lozano Camhi, M.D., San Diego, CA  
Edward Kalil Lulo, M.D., York, PA  
Kim-Oanh Thi Ly, M.D., Elk Grove, CA  
Bessy Martirosyan, M.D., Glendale, CA  
Marina Nikolayevna Metelitsin, M.D., Fort Lee, NJ  
Lobna Mohamed, M.D., Bethesda, MD  
Rachel Anne Morel, D.O., O Fallon, MO  
George L. Nodarse, M.D., Bogota, NJ  
Anne Regina O'Connell, M.D., Ashland, OR  
Celia Regina Oliveira, M.D., MPH, Washington, DC  
Diana M. Paez, M.D., New Britain, CT  
Dashrath Prahladbhai Patel, M.D., Bakersfield, CA  
Floarea Pentiuc, M.D., Jamaica Plain, MA  
Patrick Plantin, M.D., Baldwin, NY  
Rotsna Pradhan, M.D., Pawtucket, RI  
Madhavi Ratnam Prakash, M.D., Ph.D., Brookline, MA  
Aminur Rahman, M.D., Lucas, TX  
Shubha Raja, M.D., Leawood, KS  
Sailakshmi Ramanujam, M.D., Robbinsville, NJ  
Shama Rasool, M.D., Glen Head, NY  
William Jay Resnick, M.D., West Hollywood, CA  
Deidre L. Richards, M.D., Minot, ND  
Michelle Anne Rivera, M.D., Downingtown, PA  
Patricia Sarah Roy, M.D., McLean, VA  
Eric Brandon Rueth, M.D., Brooklyn, NY  
Anil Pal Saini, D.O., Montgomery, AL  
Tushar Sarker, M.D., Voorhees, NJ  
Salvatore Savatta, M.D., Brooklyn, NY  
Yakov Semenov, M.D., New York, NY  
Syed Shamsuddin, M.D., Saint John, NB  
Rubina Iftequar Sharief, M.D., Jersey City, NJ  
Sanjeev Kumar Sharma, M.D., El Paso, TX  
Jill Satzler Silbiger, M.D., Marietta, GA  
Lalitakala Sundar, M.D., Yonkers, NY  
Kaleem Uddin Syed, M.D., Columbia, MO  
Ritu Kaur Talwar, M.D., Bartlett, IL  
Dan Mario Udrea, M.D., Pittsburgh, PA  
Derick E. Vergne-Melendez, M.D., Lexington, MA  
Theodore Peter Wasik Jr., M.D., Boston, MA  
Samuel William Westmoreland, M.D., Clinton, NY  
Katherine Wilson Yarnell, M.D., Batesville, AR  
Rocco Michael Zaninelli, M.D., Ballston Lake, NY  
Ismin Zen, M.D., Biloxi, MS

**Announcing diplomates of the ABPN for: Certification in the subspecialty of Child and Adolescent Psychiatry, Part II, awarded November 7, 2014**

Digisha Agarwal, M.D., Springfield, IL  
Yousuf Ahmad, M.D., Waterford, NY  
Sibel Alev Algon, M.D., Stockton Springs, ME  
Ali Altahir, M.D., Woodbridge, VA  
Aura Marizol Ardon, M.D., New Fairfield, CT  
Victoria Lynne Barrow, M.D., Yorktown, VA  
Sudeshna Basu, M.D., Wethersfield, CT  
David Benhayon, M.D., Ph.D., Pittsburgh, PA  
Silvana Boroukhim, M.D., Newport Coast, CA  
Danielle McGovern Bradshaw, D.O., Columbia, MO  
Robert Harry Brady, M.D., Saint Louis, MO  
Luke Samuel Brewton, M.D., Bellevue, WA  
Kristina Michelle Bryant-Melvin, M.D., Proctorville, OH  
Andrew Butchart, D.O., New Berlin, WI  
Sheri Ann Butler, M.D., Seattle, WA  
Richard Francisco Camino Gaztamgide, M.D., Macon, GA  
Victoria Vadala Capobianco, D.O., Glen Head, NY  
Sarah Ann Caraisco, M.D., New York, NY  
Teri Lynn Carlson, M.D., Superior, CO  
Craig Carpenter, M.D., Galena, OH  
Rakesh Chadalavada, M.D., Richardson, TX  
Lawrence Chingwell Chan, D.O., West Covina, CA  
Elisa Long Chefitz, M.D., New Rochelle, NY  
Rachel Marian Collins, M.D., Evergreen, CO  
Joseph Andrew Cook, D.O., Newport Beach, CA  
Daniel Joseph Crawford, M.D., Seattle, WA  
Deborah Jean Crowley, M.D., Manhattan, KS  
Beatriz Helena D'Onghia Coutinho, M.D., Miami, FL  
Mayank H. Dalal, M.D., Columbia, SC  
Blair Curtis Davison, M.D., Missoula, MT  
Lisa Michelle Delaney Le, M.D., Fenton, MO  
Debra J. Den Herder, M.D., Berkeley, CA  
Ramona Anne Deveney, M.D., Richmond Hill, GA  
Kamal Preet Dhawan, M.D., Lancaster, CA  
Jeremiah E Dickerson, M.D., Burlington, VT  
Patrick Delery Drennan, M.D., New Orleans, LA  
Yael Dvir, M.D., Waltham, MA  
Kara Victoria Emerson, M.D., Nashville, TN  
Cody Jon Evans, M.D., Portland, OR  
Roseann Darlissa Fana-Perez, M.D., Forest Hills, NY  
April Louise Fields, M.D., Durham, NC  
Mary Buckley Flannery, M.D., White Plains, NY  
Bobga Sylvester Fomunung, M.D., Holland, MI  
Harvanit Kaur Gahunia, M.D., New York, NY  
Sarah Nduta Mbogo Gatumu, M.D., Indiana, PA  
Donna Renee Gill, M.D., Westfield, IN  
Balaji Gopidasan, M.D., Waterloo, ON

Robert Seth Gordon, M.D., M.P.H., Waterville, ME  
Victor George Grosu, M.D., Manalapan, NJ  
Gariane Phillips Gunter, M.D., Leesville, SC  
Michael Thomas Guppenberger, M.D., East Aurora, NY  
Andrew Todd Haber, M.D., Scottsdale, AZ  
Melvin A. Haggart, M.D., Fitchburg, WI  
Jeremy Armien Handy, M.D., Eagle, ID  
Jamie Lee Hanna, M.D., New Orleans, LA  
Michelle Renee Hausheer, M.D., Bentonville, AR  
Jabeen Hayat, M.D., Fresno, CA  
Emmeline Hazaray, M.D., Northbrook, IL  
Leigh Austin Hedrick, M.D., Portland, OR  
Chariny Michelle Herring, D.O., Tulsa, OK  
William Lyle Hinds III, M.D., Nashville, TN  
Stacie Lenore Hitchcock, M.D., Barnstable, MA  
Meredith A. Holbrook, M.D., Three Lakes, WI  
Tracie DeJarnette Holly, M.D., Sugar Land, TX  
Jeanne Hong, M.D., San Diego, CA  
Geoffrey Morgan Hopkins, M.D., Syracuse, NY  
Maryam Hosseinian, M.D., Farmington Hills, MI  
Matthew Gordon Hough, D.O., Pfafftown, NC  
Raushanah Ivery Hud-Aleem, D.O., McDonough, GA  
Junaid Akhtar Hussain, M.D., Mechanicsburg, PA  
Iman Ollie Hypolite, M.D., Bowie, MD  
Syed Amjad Imam, M.D., Norcross, GA  
Ibukun-Olu Akinyemi Isaacs, M.D., Waldorf, MD  
Sharmin Jahan, M.D., Valencia, CA  
Sadaf Javaid, M.D., Shreveport, LA  
Muhammad Junaid, M.D., Deerfield, IL  
Jason Richard Keifer, M.D., Honolulu, HI  
David Matthew Keller, D.O., San Antonio, TX  
Shamima Sultana Khan, M.D., Round Rock, TX  
Mylan Vaugeois Kohler, D.O., Manitowoc, WI  
Yelena Ilinichna Komissarova, M.D., High Point, NC  
Daniel Allen Korb, M.D., Billings, MT  
Juhee Elsa Lee, M.D., M.P.H., Irvine, CA  
Yunnie Lee, M.D., San Mateo, CA  
Scott Farrell Leibowitz, M.D., Chicago, IL  
Leonid Anatolyevich Levin, M.D., Sparks Glencoe, MD  
Julie Elizabeth Lewerenz, M.D., Charles Town, WV  
Amy Elizabeth Lister, M.D., Wayland, MA  
John Lops, D.O., Brooklyn, NY  
Bruce Merle Lovelace IV, M.D., Portsmouth, VA  
Mary John Maymana, M.D., Chandler, AZ  
Stephanie Renee Mayrant, M.D., Falls Church, VA  
Maria Annette McCarthy, M.D., Ph.D, Philadelphia, PA  
Leah Marie McCartt, M.D., LEXINGTON, SC  
Kelly Edward Melvin, M.D., Proctorville, OH  
Jennifer Lynn Mogul, M.D., Yarmouth, ME  
Pamela Jane Mosher, M.D., M.Div., Belmont, MA  
Laurie Kwai Lynn Mun, M.D., Burlingame, CA



Leslie Elaine Murray, M.D., M.P.H., Chesapeake, VA  
Sabina Mushtaq, M.D., Ramsey, NJ  
Bettina Karen Mutter, M.D., Orinda, CA  
Bobbita Nag, M.D., Waterloo, IA  
Samad E. Namin, M.D., Rye Brook, NY  
Taiwo Olushola Odedeyi, M.D., Brooklyn, NY  
Yana Oskin, M.D., Chicago, IL  
Sravanthi Pajerla, M.D., Troy, MI  
Scott Michael Palyo, M.D., New York, NY  
Damian Ross Parkinson, M.D., Tucson, AZ  
Justin James Parrott, M.D., Abilene, TX  
Casey Fay Patunoff, M.D., Colchester, VT  
Rachel E Pearson, M.D., Medford, MA  
Marie Rosette Pierre-Louis, M.D., Oceanside, NY  
Fe Maria Arriola Pimentel-Yager, M.D., Monroe City, MO  
Joan Rebecca Birnberg Pincus, M.D., Gainesville, FL  
Quazi Taibur Rahman, M.D., Brooklyn, NY  
Asif Rashid, M.D., Bethel, CT  
Ayesha Rashid, M.D., League City, TX  
Rachad Rayess, M.D., Anchorage, AK  
Lokesh Karur Reddy, M.D., Oceanside, NY  
Rodney Jay Reid, M.D., Ph.D., San Clemente, CA  
Allison Sara Remmers, M.D., Seattle, WA  
Myrangelisse Rios-Pelati, M.D., Rio Piedras, PR  
Vida Barnwell Robertson, M.D., Raleigh, NC  
Michael David Hume Rollin, M.D., Denver, CO  
Donovan Michael Ross, D.O., Hickory, NC  
Zinovi Rozenblat, M.D., Alhambra, CA  
Victor Lincoln Ruterbusch, M.D., Fpo, AP  
Beena Saad, M.D., New York, NY  
John Muir Sallee, M.D., Martin, TN  
Maria Paula Schirch, M.D., Los Angeles, CA  
Jeffrey I. Schulman, M.D., Saint Louis, MO  
Lisa Marie Sheehan, M.D., Evans, GA  
Sacheen Shrestha, M.B.B.S., Bismarck, ND  
Gabrielle Helen Silver, M.D., New York, NY  
Mark Lawrence Silverman, M.D., Birmingham, MI  
Stacy Michelle Simpson, M.D., Little Rock, AR  
Lydia Kay Sit, M.D., Philadelphia, PA  
Rangsun Sitthichai, M.D., Chelsea, MA  
Olga Marcus Smetkov, M.D., Sharon, MA  
Loretta Ann Sonnier, M.D., Birmingham, AL  
Randall Dean Staley Jr., M.D., Cave Springs, AR  
Ehsan Ullah Syed, M.D., Hummelstown, PA  
Cristiana Floriana Teodorescu, M.D., Saint Louis, MO  
Robyn Michelle Treadwell, M.D., Fpo, AP  
Elizabeth Turin, M.D., Towson, MD  
Valerie Jones Tutson, M.D., Los Angeles, CA  
Dan Ron Tzuang, M.D., Santa Ana, CA  
Reem Samir Utterback, M.D., Raleigh, NC  
Deepti-Sagar Varma, M.D., Holmdel, NJ

Jason Gupit Velasco, M.D., Ridgefield, CT  
Hema Vyas, M.D., Lincroft, NJ  
D'Loreyn Walker, M.D., Orland Park, IL  
Miroslaw Jan Walo, M.D., Evanston, IL  
Ashley Elizabeth Wheeler, M.D., Denver, CO  
Jennifer Lynn Wildpret, D.O., Pittsburgh, PA  
Katrijn Seynnaeve Wilson, M.D., Austin, TX  
Lora Hilary Wolk, M.D., Jamesville, NY  
Lu Ye, M.D., Dunlap, IL  
Yilmaz Yildirim, M.D., Rochester, NY  
Xiaoling Zhu, M.D., Danville, CA
